# Supplementary material for: Lipid management in ischaemic stroke or transient ischaemic attack in China: result from China National Stroke Registry III
Source: PubMed Central journal article supplement — BMJ Open. 2023 Mar 8;13(3):e069465. doi: 10.1136/bmjopen-2022-069465 (PMC10008417; doi:10.1136/bmjopen-2022-069465), 2023-03-08
Supplement: bmjopen-2022-069465.draft_revisions.pdf [file bmjopen-2022-069465.draft_revisions.pdf]

# BMJ Open

BMJ Open is committed to open peer review. As part of this commitment we make the peer review history of every article we publish publicly available.

When an article is published we post the peer reviewers' comments and the authors' responses online. We also post the versions of the paper that were used during peer review. These are the versions that the peer review comments apply to.

The versions of the paper that follow are the versions that were submitted during the peer review process. They are not the versions of record or the final published versions. They should not be cited or distributed as the published version of this manuscript.

BMJ Open is an open access journal and the full, final, typeset and author-corrected version of record of the manuscript is available on our site with no access controls, subscription charges or pay-per-view fees (<http://bmjopen.bmj.com>).

If you have any questions on BMJ Open's open peer review process please email [info.bmjopen@bmj.com](mailto:info.bmjopen@bmj.com)

# BMJ Open

## Lipid management in Ischemic Stroke or Transient Ischemic Attack in China: Result from China National Stroke Registry III

|                               |                                                                                                                                                                                                                                                                                                                                                                                                                                                                                                                                                                                                                                                                                                                                                                                                         |
|-------------------------------|---------------------------------------------------------------------------------------------------------------------------------------------------------------------------------------------------------------------------------------------------------------------------------------------------------------------------------------------------------------------------------------------------------------------------------------------------------------------------------------------------------------------------------------------------------------------------------------------------------------------------------------------------------------------------------------------------------------------------------------------------------------------------------------------------------|
| Journal:                      | <i>BMJ Open</i>                                                                                                                                                                                                                                                                                                                                                                                                                                                                                                                                                                                                                                                                                                                                                                                         |
| Manuscript ID                 | bmjopen-2022-069465                                                                                                                                                                                                                                                                                                                                                                                                                                                                                                                                                                                                                                                                                                                                                                                     |
| Article Type:                 | Original research                                                                                                                                                                                                                                                                                                                                                                                                                                                                                                                                                                                                                                                                                                                                                                                       |
| Date Submitted by the Author: | 11-Nov-2022                                                                                                                                                                                                                                                                                                                                                                                                                                                                                                                                                                                                                                                                                                                                                                                             |
| Complete List of Authors:     | Xu, Yuyuan; Beijing Tiantan Hospital,<br>Chen, Weiqi; Beijing Tiantan Hospital<br>Wang, Mengxing; Beijing Tiantan Hospital<br>PAN, YUESONG; Beijing Tiantan Hospital, China National Clinical<br>Research Center for Neurological Diseases<br>Li, Zixiao; Beijing Tiantan Hospital, Neurology<br>Liu, Liping; Beijing Tiantan Hospital, Neurology; China National Clinical<br>Research Center for Neurological Diseases,<br>Zhao, Xingquan; Beijing Tiantan Hospital, Neurology<br>Wang, Yilong; Beijing Tiantan Hospital, Department of Neurology<br>Li, Hao; Beijing Tiantan Hospital<br>Wang, Yongjun; Beijing Tiantan Hospital, China National Clinical<br>Research Center for Neurological Diseases<br>Meng, Xia; Beijing Tiantan Hospital, Department of Neurology; Capital<br>Medical University |
| Keywords:                     | Neurology < INTERNAL MEDICINE, Lipid disorders < DIABETES &<br>ENDOCRINOLOGY, Stroke medicine < INTERNAL MEDICINE, Stroke <<br>NEUROLOGY                                                                                                                                                                                                                                                                                                                                                                                                                                                                                                                                                                                                                                                                |
|                               |                                                                                                                                                                                                                                                                                                                                                                                                                                                                                                                                                                                                                                                                                                                                                                                                         |

SCHOLARONE™  
Manuscripts

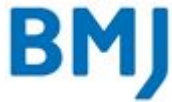

I, the Submitting Author has the right to grant and does grant on behalf of all authors of the Work (as defined in the below author licence), an exclusive licence and/or a non-exclusive licence for contributions from authors who are: i) UK Crown employees; ii) where BMJ has agreed a CC-BY licence shall apply, and/or iii) in accordance with the terms applicable for US Federal Government officers or employees acting as part of their official duties; on a worldwide, perpetual, irrevocable, royalty-free basis to BMJ Publishing Group Ltd ("BMJ") its licensees and where the relevant Journal is co-owned by BMJ to the co-owners of the Journal, to publish the Work in this journal and any other BMJ products and to exploit all rights, as set out in our [licence](#).

The Submitting Author accepts and understands that any supply made under these terms is made by BMJ to the Submitting Author unless you are acting as an employee on behalf of your employer or a postgraduate student of an affiliated institution which is paying any applicable article publishing charge ("APC") for Open Access articles. Where the Submitting Author wishes to make the Work available on an Open Access basis (and intends to pay the relevant APC), the terms of reuse of such Open Access shall be governed by a Creative Commons licence – details of these licences and which [Creative Commons](#) licence will apply to this Work are set out in our licence referred to above.

Other than as permitted in any relevant BMJ Author's Self Archiving Policies, I confirm this Work has not been accepted for publication elsewhere, is not being considered for publication elsewhere and does not duplicate material already published. I confirm all authors consent to publication of this Work and authorise the granting of this licence.

1  
2  
3  
4 **Lipid management in Ischemic Stroke or Transient Ischemic Attack in China:**  
5  
6 **Result from China National Stroke Registry III**  
7  
8  
9

10  
11 Yu-Yuan Xu, MD<sup>a, b</sup>; Wei-Qi Chen, MD<sup>a, b</sup>; Meng-Xing Wang, PhD<sup>b</sup>; Yue-Song  
12  
13 Pan, PhD<sup>b</sup>; Zi-Xiao Li, MD<sup>a, b</sup>; Li-Ping Liu, MD<sup>a, b</sup>; Xing-Quan Zhao, MD<sup>a, b</sup>; Yi-  
14  
15 Long Wang, MD<sup>a, b</sup>; Hao Li, PhD<sup>b</sup>; Yong-Jun Wang, MD<sup>a, b, c, d</sup>; Xia Meng, MD<sup>a, b</sup>;  
16  
17  
18 on behalf of the CNSR-III Investigators  
19  
20  
21

22  
23  
24  
25 <sup>a</sup> Department of Neurology, Beijing Tiantan Hospital, Capital Medical University,  
26  
27 Beijing, China  
28

29  
30 <sup>b</sup> China National Clinical Research Center for Neurological Diseases, Beijing Tiantan  
31  
32 Hospital, Capital Medical University, Beijing, China  
33

34  
35 <sup>c</sup> Advanced Innovation Center for Human Brain Protection, Capital Medical  
36  
37 University, Beijing, China  
38

39  
40 <sup>d</sup> Research Unit of Artificial Intelligence in Cerebrovascular Disease, Chinese  
41  
42 Academy of Medical Sciences, 2019RU018  
43  
44  
45

46  
47  
48 **Running title:** Lipid management in Ischemic Stroke or TIA  
49

50  
51 Correspondence to Dr. Xia Meng: No. 119 South 4th Ring West Road, Fengtai  
52  
53 District, Beijing 100070, China. Email: mengxia45@163.com. Phone: +86 10  
54  
55 59978245. Fax: +86 10 59973383.  
56

57  
58 Number of Tables: 7  
59  
60

1  
2  
3  
4  
5  
6  
7  
8  
9  
10  
11  
12  
13  
14  
15  
16  
17  
18  
19  
20  
21  
22  
23  
24  
25  
26  
27  
28  
29  
30  
31  
32  
33  
34  
35  
36  
37  
38  
39  
40  
41  
42  
43  
44  
45  
46  
47  
48  
49  
50  
51  
52  
53  
54  
55  
56  
57  
58  
59  
60

Number of Figures: 1

Word count: 3444

**Keywords:** low-density lipoprotein cholesterol, lipid-lowering treatment, ischemic stroke, second prevention

For peer review only

## Abstract

**Background and purpose:** Dyslipidaemia is a significant risk factor for ischemic stroke and transient ischemic attack (TIA). This study aimed to assess the management of LDL-C and the goal achievement and to investigate the association between baseline low-density lipoprotein cholesterol (LDL-C) level, lipid-lowering treatment (LLT), and stroke recurrence in patients with ischemic stroke or TIA.

**Methods:** We derived data from the Third China National Stroke Registry (CNSR-III). The primary outcome was a new stroke, LDL-C goal (LDL-C<1.8mmol/L and LDL-C<1.4mmol/L, respectively) achievement rates, and LLT compliance within 3, 6, and 12 months. The association of baseline LDL-C level, LLT at discharge, and outcomes were assessed.

**Results:** Among the 15,166 patients, over 90% of patients received LLT during hospitalization and 2 weeks after discharge; the LLT compliance was 84.5% at 3 months, 75.6% at 6 months, and 64.8% at 12 months. LDL-C goal achievement for 1.8mmol/L and 1.4mmol/L was 35.4% and 17.6% at 12 months. LLT at discharge was associated with reduced risk of ischemic stroke recurrence (HR=0.687, 95% CI: 0.480-0.985, p=0.0411) at 3 months. The rate of LDL-C reduction from baseline to 3-month follow-up was not associated with a reduced risk of stroke recurrence, and major adverse cardiovascular events (MACE) at 12 months. Patients with baseline LDL-C  $\leq$ 1.4mmol/L had a numerically lower risk of stroke, ischemic stroke and MACE at both 3 months and 12 months.

1  
2  
3  
4 **Conclusions:** The goal achievement of LDL-C has increased mildly in the stroke and  
5  
6 TIA population in mainland China. Lowered baseline LDL-C level was significantly  
7  
8 associated with a decreased short- and long-term risk of ischemic stroke among stroke  
9  
10 and TIA patients. LDL-C<1.4mmol/L might be a safe standard for this population.  
11  
12  
13  
14  
15  
16  
17  
18  
19  
20  
21  
22  
23  
24  
25  
26  
27  
28  
29  
30  
31  
32  
33  
34  
35  
36  
37  
38  
39  
40  
41  
42  
43  
44  
45  
46  
47  
48  
49  
50  
51  
52  
53  
54  
55  
56  
57  
58  
59  
60

For peer review only

## Introduction

Low-density lipoprotein cholesterol (LDL-C) has been well established as an independent risk factor for ischemic stroke<sup>1</sup>. Intensive lipid-lowering treatment (LLT) has been proven to reduce cardiovascular event recurrence in ischemic stroke/TIA patients. The Stroke Prevention by Aggressive Reduction in Cholesterol Levels (SPARCL) study<sup>2</sup> showed that intensive atorvastatin treatment for five years reduced the risk of stroke recurrence up to 16% (HR 0.84, 95% CI 0.71-0.99; P<0.03) in ischemic stroke (IS) or transient ischemic attack (TIA). Recently, TST study<sup>3</sup> also demonstrated that IS/TIA patients who had a target LDL-C level of less than 70 mg/dl (1.8mmol/L) had a lower risk of subsequent cardiovascular events than those who had a target range of 90 to 110 mg/dl (HR 0.78, 95% CI 0.61-0.98; P=0.04). Therefore, European Stroke Organisation (ESO) and American Stroke Association (ASA) both updated the IS/TIA second prevention guideline with a recommendation of LDL-C target goal to less than 70mg/dl (1.8mmol/L)<sup>4,5</sup>.

However, there are still clinical questions not thoroughly investigated. Firstly, SPARCL and Treat Stroke to Target (TST) trials are randomized controlled trials conducted mainly in the Caucasian population<sup>2,6</sup>, while studies focusing on the Asian population on lipid management in stroke patients are limited. Since there are more intracranial artery stenosis (ICAS)<sup>7,8</sup> and cerebral small vessel disease (CSVD) patients in Asia<sup>9,10</sup>, especially in east Asia, the conclusions of these two trials in Asia should be discreet. Secondly, there were inconsistencies and conflicts about whether the lower LDL-C level could increase the risk of intracranial hemorrhage (ICH),



1  
2  
3  
4 especially during the acute or subacute phase. In the SPARCL study, subgroup  
5  
6 analysis indicated that atorvastatin treatment might increase the risk of ICH, which led  
7  
8 to a big concern for statin usage during the acute phase of IS/TIA <sup>11</sup>. In contrast, the  
9  
10 TST study showed that the incidence of ICH did not differ significantly between the  
11  
12 lower- and higher-target groups <sup>3</sup>. Thirdly, with emerging evidence from non-statin  
13  
14 therapies such as IMPROVE-IT <sup>12</sup>, FOURIER <sup>13</sup>, and ODYSSEY <sup>14</sup>, a lower LDL-C  
15  
16 target of less than 1.4mmol/L or even 1.0mmol/L has been recommended by  
17  
18 international guidelines. However, the benefit of a lower LDL-C target other than  
19  
20 1.8mmol/L has not been investigated.

21  
22 The Third China National Stroke Registry (CNSR-III) is one of the world's most  
23  
24 extensive IS/TIA cohort studies, which included comprehensive medical history,  
25  
26 centralized the Trial of Org 10172 in Acute Stroke Treatment (TOAST) classification  
27  
28 judication, and follow-up outcomes. We aim to collect data from CNSR-III to  
29  
30 investigate China's current lipid management situation and the association between  
31  
32 LDL-C level, LLT, and stroke recurrence in ischemic stroke or TIA patients.  
33  
34  
35  
36  
37  
38  
39  
40  
41  
42

## 43 **Methods**

### 44 **Patient and Public Involvement**

45  
46 The development and organization of the study depended on stroke center  
47  
48 organizations and networks in China. Our co-investigators conducted a series of  
49  
50 meetings and discussions with national stroke patients. Patient education is always an  
51  
52 important work of the organization. We provided standard educational materials and a  
53  
54  
55  
56  
57  
58  
59  
60

1  
2  
3  
4 research tutorial to each stroke center, to help to encourage familiarity with research  
5  
6 concepts and terminology. The discussion of study design and research method were  
7  
8 conveyed to the patients by co-investigators, using laypersons' language to facilitate  
9  
10 common understanding, and we solicited patients' feedback. We also conduct quality  
11  
12 control regularly to provide advice and service for patients. When results emerged, we  
13  
14 reviewed the results with patient co-investigators to obtain their perspectives and  
15  
16 feedback to ensure that we presented the findings in the most effective way beyond  
17  
18 the research community to general populations.  
19  
20  
21  
22  
23  
24  
25

### 26 **Study design and participants**

27  
28  
29 We derived data from the CNSR-III database. The CNSR-III is a nationwide clinical  
30  
31 registry of ischemic stroke or transient ischemic attack (TIA) based on etiology,  
32  
33 imaging, and biological markers in China from August 2015 to March 2018 <sup>15</sup>.  
34  
35 Consecutive patients were recruited consecutively if they were: (1) aged >18 years; (2)  
36  
37 patients with physician-diagnosed ischemic stroke or TIA; (3) within 7 days from the  
38  
39 onset of symptoms to enrolment; (4) patients who have provided consent to  
40  
41 participant in the study. Patients were excluded if they had silent cerebral infarction  
42  
43 with no symptoms or signs, or those who refused to participate in the registry. The  
44  
45 study protocol of the CNSR-III was approved by the ethics committee at Beijing  
46  
47 Tiantan Hospital (IRB approval number: KY2015-001-01) and all participating  
48  
49 centres. Every participant provided written informed consent before participation.  
50  
51  
52  
53  
54  
55  
56  
57  
58  
59  
60

1  
2  
3  
4 Among all the clinical centers included in CNSR-III, 169 centers voluntarily  
5  
6 participated in the prespecified blood biomarker substudy. All the patients at these  
7  
8 centers participated in this biomarker substudy. Patients participating in the biomarker  
9  
10 substudy provided a separate written informed consent form, including consent for  
11  
12 blood sample collection and further study of biomarkers.  
13  
14

15  
16  
17 A total of 15166 patients were eligible and had complete information at baseline.  
18  
19

### 20 **Data Collection and Management**

21  
22  
23 Patient information, including demographics, risk factors, comorbidities, medications,  
24  
25 selected laboratory tests, and hospital-level characteristics, were collected  
26  
27 systematically during hospitalization and at discharge by trained research coordinators  
28  
29 at each participating hospital. National Institutes of Health Stroke Scale (NIHSS)  
30  
31 score at admission, and ischemic stroke recurrence, composite vascular event, and  
32  
33 modified Rankin Scale (mRS) at 3 months and 1 year after stroke onset were also  
34  
35 collected.  
36  
37

38  
39  
40 Venous blood samples were collected from fasting patients within 24 hours from  
41  
42 admission. Serum specimens were extracted, aliquoted, and transported through the  
43  
44 cold chain to the central laboratory in Beijing Tiantan Hospital and stored at -80°C.  
45  
46

47  
48  
49 LDL-C measurements were centrally and blindly assayed by enzymatic method on the  
50  
51 Cobas 8000 analyzer c702 module (Roche Diagnostics, Mannheim, Germany).  
52  
53

### 54 **Follow-Up and Clinical Outcome Evaluations**

55  
56  
57  
58  
59  
60

1  
2  
3  
4 Patients were followed up by face-to-face interviews at 3 months and by telephone  
5  
6 interviews at 6 and 12 months by trained research coordinators based on a  
7  
8 standardized interview protocol. Information collected at each follow-up included  
9  
10 cardio-/cerebrovascular events, all causes of death, and medications use. Vascular  
11  
12 events were confirmed from the treating hospital, and death was either confirmed on a  
13  
14 death certificate from the attending hospital or the local civil registry.  
15  
16  
17

18  
19 The primary outcome was a new stroke (defined as a new neurological deficit lasting  
20  
21 more than 24 hours or re-hospitalization with a diagnosis of ischemic stroke,  
22  
23 intracerebral hemorrhage, and subarachnoid hemorrhage), LDL-C goal (LDL-  
24  
25 C<1.4mmol/L, and LDL-C<1.8mmol/L, respectively) achievement rates and LLT  
26  
27 compliance in China within 3, 6, and 12 months. The secondary outcomes included  
28  
29 major adverse cardiovascular events (including stroke, myocardial infarction, or  
30  
31 vascular death) and all caused death at 3 months and 12 months.  
32  
33  
34  
35  
36

37 All reported efficacy and safety outcomes were verified by a central independent  
38  
39 adjudication committee blinded to study treatment assignments and baseline LDL-C  
40  
41 level.  
42  
43  
44

45 Patients were categorized into four groups according to baseline LDL-C levels and  
46  
47 lipid-lowering treatment during hospitalization and after discharge: LDL-  
48  
49 C≤1.4mmol/L, 1.4mmol/L<LDL-C ≤1.8mmol/L, 1.8 mmol/L<LDL≤2.6mmol/L,  
50  
51 LDL>2.6mmol/L.  
52  
53  
54

55 LLT compliance was defined as the continuation of LLT medication from discharge  
56  
57 to 3, 6, or 12 months after the onset of symptoms. Patients assigned to LLT at  
58  
59  
60

1  
2  
3  
4 discharge but later discontinuing LLT at any follow-up point within 3, 6, or 12  
5  
6 months were considered “non-persistent”. Patients were considered persistent if they  
7  
8 discontinued one medication but took another statin medication within 3, 6, or 12  
9  
10 months.  
11  
12  
13  
14

### 15 **Statistical analysis**

16  
17  
18  
19 Baseline variables were presented as median with interquartile range (IQR) for  
20  
21 continuous variables and percentages for categorical variables.  
22  
23

24 To analyze the association of baseline LDL-C levels and outcomes, we only included  
25  
26 those subjects who provided 3-month or 12-month bio-sample. Univariate and  
27  
28 multivariate Cox proportional hazard regression models were used. The model  
29  
30 included the following covariates: age, sex, education, current smoking, heavy  
31  
32 drinking, medical history, stroke severity on the NIHSS, history of stroke, history of  
33  
34 diabetes, and history of hypertension. Adjusted hazard ratios (HRs) with 95%  
35  
36 confidence intervals (CIs) were calculated. The dose-response-relationship curves  
37  
38 were also presented.  
39  
40  
41  
42  
43  
44

45 To analyze the effect of discharge LLT on outcomes, we excluded subjects who  
46  
47 reached the end point (stroke recurrence or MACE, death, and loss to follow-up)  
48  
49 during hospitalization. We performed a univariate model and multivariable analysis  
50  
51 by adjusting for age, sex, education, current smoking, heavy drinking, medical  
52  
53 history, stroke severity on the NIHSS, history of stroke, history of diabetes, and  
54  
55 history of hypertension.  
56  
57  
58  
59  
60

In addition, to analyze the association of 3-month LDL-C change with stroke recurrence and MACE in 12 months, we excluded subjects who reached the end point (stroke recurrence or MACE, death, and loss to follow-up) within 3 months.

Related statistical analyses in the study was performed by SAS 9.4 software. All statistical analysis adopted a two-sided test which will be performed at a 5% significance level.

## Results

### Characteristics of study participants

From August 2015 to March 2018, a total of 15166 patients with acute stroke and TIA were recruited to the CNSR-III trial and entered our final analysis. The average age of 62.2±11.3 years, 31.7% of patients were women, 14146 (93.3%) had an index event of stroke, and 1020 (6.7%) had a TIA <sup>15</sup>.

### Baseline LDL-C levels

There were 10,738 patients in LDL-C analysis set: 1407 (13.1%), 1636 (15.2%), 3655 (34.0%), and 4040 (37.6%) patients with an LDL-C ≤1.4mmol/L, LDL-C 1.4–1.8mmol/L, LDL-C 1.8–2.6mmol/L, LDL-C ≥ 2.6mmol/L, respectively (**Table 1**).

**Table 1. Baseline Characteristics for the LDL-C analysis set**

| Variables                  | LDL≤1.4mmol/L<br>N=1407 | 1.4 <<br>LDL≤1.8mmol/L<br>N=1636 | 1.8 <<br>LDL≤2.6mmol/L<br>N=3655 | LDL>2.6mmol/L<br>N=4040 | P<br>Value* |
|----------------------------|-------------------------|----------------------------------|----------------------------------|-------------------------|-------------|
| Women, n (%)               | 378 (26.9)              | 439 (26.8)                       | 1057 (28.9)                      | 1517 (37.6)             | <0.001      |
| Mean age, years (SD)       | 60.8±11.9               | 62.4±11.3                        | 62.2±11.3                        | 62.8±11.1               | <0.001      |
| Ethnicity (non-Han), n (%) | 30 (2.1)                | 49 (3.0)                         | 122 (3.3)                        | 104 (2.6)               | 0.07        |
| Current smoker, n (%)      | 435 (30.9)              | 525 (32.1)                       | 1239 (33.9)                      | 1198 (29.7)             | <0.001      |
| Heavy drinker, n (%)*      | 185 (13.2)              | 210 (12.8)                       | 545 (14.9)                       | 589 (14.6)              | 0.12        |

|    |                                  |                     |                     |                     |                     |        |
|----|----------------------------------|---------------------|---------------------|---------------------|---------------------|--------|
| 1  |                                  |                     |                     |                     |                     |        |
| 2  |                                  |                     |                     |                     |                     |        |
| 3  | Triglycerides (IQR)              | 1.3 (0.9-1.9)       | 1.3 (1.0-1.8)       | 1.3 (1.0-1.8)       | 1.5 (1.1-2.0)       | <0.001 |
| 4  | TC, mmol/L                       | 2.7 (2.4-3.1)       | 3.2 (3.0-3.5)       | 3.8 (3.5-4.1)       | 4.9 (4.5-5.5)       | <0.001 |
| 5  | HDL-C, mmol/L                    | 0.8 (0.7-1.0)       | 0.9 (0.8-1.1)       | 0.9 (0.8-1.1)       | 1.0 (0.8-1.2)       | <0.001 |
| 6  | LDL-C, mmol/L                    | 1.2 (1.0-1.3)       | 1.6 (1.5-1.7)       | 2.2 (2.0-2.4)       | 3.2 (2.9-3.8)       | <0.001 |
| 7  | BMI                              | 24.4 (22.5-26.4)    | 24.5 (22.7-26.6)    | 24.4 (22.5-26.4)    | 24.5 (22.7-26.7)    | 0.06   |
| 8  | Systolic pressure, mmHg          | 145.0 (132.5-160.0) | 146.5 (133.0-161.0) | 148.5 (135.0-163.5) | 150.0 (136.0-166.5) | <0.001 |
| 9  | Medical history, n (%)           |                     |                     |                     |                     |        |
| 10 | Ischemic stroke                  | 369 (26.2)          | 429 (26.2)          | 715 (19.6)          | 748 (18.5)          | <0.001 |
| 11 | TIA                              | 44 (3.1)            | 46 (2.8)            | 115 (3.6)           | 102 (2.5)           | 0.38   |
| 12 | Coronary heart diseases          | 147 (10.5)          | 193 (11.8)          | 366 (10.0)          | 449 (11.1)          | 0.20   |
| 13 | Atrial fibrillation              | 93 (6.6)            | 124 (7.6)           | 272 (7.4)           | 257 (6.4)           | 0.19   |
| 14 | Hypertension                     | 897 (63.8)          | 1045 (63.9)         | 2295 (62.8)         | 2516 (62.3)         | 0.62   |
| 15 | Diabetes mellitus                | 386 (27.4)          | 394 (24.1)          | 824 (22.5)          | 960 (23.8)          | 0.004  |
| 16 | Hypercholesterolemia             | 119 (8.5)           | 120 (7.3)           | 302 (8.3)           | 341 (8.4)           | 0.56   |
| 17 | NIHSS at admission, median (IQR) | 3.0 (1.0-6.0)       | 3.0 (1.0-6.0)       | 3.0 (1.0-6.0)       | 3.0 (1.0-6.0)       | <0.001 |
| 18 | NIHSS 0-3                        | 743 (52.8)          | 914 (55.9)          | 1974 (54.0)         | 2073 (51.3)         | 0.009  |
| 19 | NIHSS ≥4                         | 664 (47.2)          | 722 (44.1)          | 1681 (46.0)         | 1967 (48.7)         |        |
| 20 | mRS (IQR)                        | 0 (0-1.0)           | 0 (0-1.0)           | 0 (0-1.0)           | 0 (0-0)             | <0.001 |
| 21 | Stroke subtype, n (%)            |                     |                     |                     |                     |        |
| 22 | LAA                              | 303 (21.5)          | 390 (23.8)          | 933 (25.5)          | 1092 (27.0)         | 0.0095 |
| 23 | CE                               | 81 (5.8)            | 96 (5.9)            | 251 (6.9)           | 256 (6.3)           |        |
| 24 | SAO                              | 312 (22.2)          | 359 (21.9)          | 740 (20.3)          | 819 (20.3)          |        |
| 25 | Other                            | 21 (1.5)            | 16 (1.0)            | 38 (1.0)            | 47 (1.2)            |        |
| 26 | Unknown                          | 690 (49.0)          | 775 (47.4)          | 1693 (46.3)         | 1826 (45.2)         |        |
| 27 | Antiplatelet therapy, n (%)      | 1357 (97.4)         | 1569 (97.1)         | 3504 (96.7)         | 3894 (97.0)         | 0.57   |
| 28 | LLT, n (%)                       | 1359 (97.6)         | 1558 (96.4)         | 3498 (96.5)         | 3897 (97.1)         | 0.15   |
| 29 | Statin, n (%)                    | 1355 (97.3)         | 1556 (96.3)         | 3491 (96.3)         | 3887 (96.9)         | 0.27   |

TC: total cholesterol. HDL-C: high-density lipoprotein cholesterol. LDL-C: low-density lipoprotein cholesterol. BMI: body mass index. TIA: transient ischemic attack. NIHSS: National Institutes of Health Stroke Scale. mRS: modified Rankin Scale. LAA: large artery atherosclerosis. CE: cardiogenic embolism. SAO: small artery occlusion. LLT: lipid-lowering therapy.

Patients in the lower baseline LDL-C level group ( $\leq 1.4$  mmol/L) were more likely to be younger ( $p < 0.0001$ ) and had a greater prevalence of cardiovascular risk factors (previous stroke, hypertension, hypercholesterolemia, diabetes mellitus, and history of stroke) ( $p < 0.0001$ ) and a lower level of triglycerides, total cholesterol and high-density lipoprotein (HDL) ( $p < 0.0001$ ). About 97% of included patients had medication history of antiplatelet and lipid-lowering therapy, and the rates showed no difference among the four groups.

## Association between baseline LDL-C levels and outcomes at 3 months and 12 months

There were 656 (6.11%) new stroke occurrences at 3 months and 1037 (9.66%) at 12 months (Table 2).

**Table 2. Association between baseline LDL-C levels and outcomes at 3 months and 12 months**

|                           | Total | Events (n%) | HR (95% CI) Unadjusted | P value | HR (95% CI) Adjusted | P value |
|---------------------------|-------|-------------|------------------------|---------|----------------------|---------|
| <b>3 months</b>           |       |             |                        |         |                      |         |
| <b>Stroke recurrence</b>  |       |             |                        |         |                      |         |
| LDL≤1.4mmol/L             | 1407  | 69 (4.9)    | 0.72 (0.55-0.94)       | 0.01    | 0.74 (0.57-0.97)     | 0.03    |
| 1.4<LDL≤1.8mmol/L         | 1636  | 95 (5.8)    | 0.85 (0.68-1.08)       | 0.18    | 0.89 (0.70-1.12)     | 0.32    |
| 1.8<LDL≤2.6mmol/L         | 3655  | 219 (6.0)   | 0.88 (0.74-1.05)       | 0.17    | 0.91 (0.76-1.08)     | 0.28    |
| LDL>2.6mmol/L             | 4040  | 273 (6.8)   | Reference              | -       | Reference            | -       |
| <b>Ischemic stroke</b>    |       |             |                        |         |                      |         |
| LDL≤1.4mmol/L             | 1407  | 65 (4.6)    | 0.72 (0.55-0.95)       | 0.02    | 0.74 (0.56-0.98)     | 0.03    |
| 1.4<LDL≤1.8mmol/L         | 1636  | 88 (5.4)    | 0.84 (0.66-1.07)       | 0.16    | 0.87 (0.68-1.11)     | 0.27    |
| 1.8<LDL≤2.6mmol/L         | 3655  | 201 (5.5)   | 0.86 (0.72-1.04)       | 0.11    | 0.89 (0.74-1.07)     | 0.22    |
| LDL>2.6mmol/L             | 4040  | 257 (6.4)   | Reference              | -       | Reference            | -       |
| <b>Hemorrhagic stroke</b> |       |             |                        |         |                      |         |
| LDL≤1.4mmol/L             | 1407  | 4 (0.3)     | 0.52 (0.18-1.51)       | 0.23    | 0.55 (0.19-1.61)     | 0.28    |
| 1.4<LDL≤1.8mmol/L         | 1636  | 9 (0.6)     | 1.01 (0.46-2.19)       | 0.98    | 1.03 (0.47-2.26)     | 0.93    |
| 1.8<LDL≤2.6mmol/L         | 3655  | 20 (0.6)    | 1.00 (0.55-1.84)       | 0.99    | 0.93 (0.50-1.73)     | 0.82    |
| LDL>2.6mmol/L             | 4040  | 22 (0.5)    | Reference              | -       | Reference            | -       |
| <b>MACE</b>               |       |             |                        |         |                      |         |
| LDL≤1.4mmol/L             | 1407  | 71 (5.1)    | 0.72 (0.56-0.94)       | 0.01    | 0.75 (0.57-0.97)     | 0.03    |
| 1.4<LDL≤1.8mmol/L         | 1636  | 100 (6.1)   | 0.88 (0.70-1.10)       | 0.27    | 0.91 (0.72-1.15)     | 0.42    |
| 1.8<LDL≤2.6mmol/L         | 3655  | 231 (6.3)   | 0.91 (0.77-1.08)       | 0.29    | 0.93 (0.78-1.11)     | 0.43    |
| LDL>2.6mmol/L             | 4040  | 279 (6.9)   | Reference              | -       | Reference            | -       |
| <b>12 months</b>          |       |             |                        |         |                      |         |
| <b>Stroke recurrence</b>  |       |             |                        |         |                      |         |
| LDL≤1.4mmol/L             | 1407  | 114 (8.1)   | 0.76 (0.62-0.93)       | 0.009   | 0.77 (0.62-0.95)     | 0.01    |
| 1.4<LDL≤1.8mmol/L         | 1636  | 158 (9.7)   | 0.91 (0.76-1.08)       | 0.30    | 0.92 (0.76-1.10)     | 0.36    |
| 1.8<LDL≤2.6mmol/L         | 3655  | 339 (9.7)   | 0.87 (0.76-1.01)       | 0.06    | 0.89 (0.77-1.03)     | 0.12    |
| LDL>2.6mmol/L             | 4040  | 426 (10.5)  | Reference              | -       | Reference            | -       |
| <b>Ischemic stroke</b>    |       |             |                        |         |                      |         |
| LDL≤1.4mmol/L             | 1407  | 102 (7.6)   | 0.72 (0.58-0.90)       | 0.004   | 0.73 (0.59-0.91)     | 0.005   |
| 1.4<LDL≤1.8mmol/L         | 1636  | 145 (8.9)   | 0.89 (0.73-1.07)       | 0.22    | 0.90 (0.74-1.09)     | 0.27    |
| 1.8<LDL≤2.6mmol/L         | 3655  | 304 (8.3)   | 0.83 (0.72-0.97)       | 0.02    | 0.86 (0.74-1.00)     | 0.04    |
| LDL>2.6mmol/L             | 4040  | 400 (9.9)   | Reference              | -       | Reference            | -       |
| <b>Hemorrhagic stroke</b> |       |             |                        |         |                      |         |
| LDL≤1.4mmol/L             | 1407  | 12 (0.9)    | 0.96 (0.50-1.84)       | 0.89    | 0.97 (0.50-1.88)     | 0.93    |
| 1.4<LDL≤1.8mmol/L         | 1636  | 15 (0.9)    | 1.03 (0.56-1.87)       | 0.94    | 1.02 (0.56-1.88)     | 0.95    |
| 1.8<LDL≤2.6mmol/L         | 3655  | 37 (1.0)    | 1.13 (0.72-1.80)       | 0.59    | 1.10 (0.69-1.75)     | 0.69    |
| LDL>2.6mmol/L             | 4040  | 36 (0.9)    | Reference              | -       | Reference            | -       |



**MACE**

|                   |      |            |                  |       |                  |      |
|-------------------|------|------------|------------------|-------|------------------|------|
| LDL≤1.4mmol/L     | 1407 | 119 (8.5)  | 0.76 (0.62-0.93) | 0.008 | 0.77 (0.62-0.94) | 0.01 |
| 1.4<LDL≤1.8mmol/L | 1636 | 170 (10.4) | 0.94 (0.79-1.12) | 0.47  | 0.94 (0.79-1.13) | 0.50 |
| 1.8<LDL≤2.6mmol/L | 3655 | 363 (9.9)  | 0.90 (0.78-1.03) | 0.13  | 0.91 (0.79-1.05) | 0.20 |
| LDL>2.6mmol/L     | 4040 | 444 (11.0) | Reference        | -     | Reference        | -    |

LDL-C: low-density lipoprotein cholesterol. MACE: major adverse cardiovascular events.

Compared with patients with other LDL-C level subgroups, patients with LDL-C ≤1.4mmol/L had a numerically lower risk of stroke (HR=0.742, 95% CI: 0.568-0.970, p=0.0291), ischaemic stroke (HR=0.741, 95% CI: 0.562-0.976, p=0.0329) and MACE (HR=0.746, 95% CI: 0.573-0.972, p=0.0297) at 3 months. Similar results were found for the outcome of stroke (HR=0.767, 95% CI: 0.622-0.946, p=0.0131), ischaemic stroke (HR=0.731, 95% CI: 0.587-0.911, p=0.0052) and MACE (HR=0.766, 95% CI: 0.624-0.940, p=0.0106) in 12 months. Lower baseline LDL-C level was not associated with an increased risk of hemorrhagic stroke at both 3 months and 12 months (**Table 2**). Using a Cox regression model with restricted cubic splines, a larger magnitude of associations was also found between baseline LDL-C level and risk of stroke, ischemic stroke, hemorrhagic stroke, and MACE (**Figure 1**).

### **Lipid-lowering management, LLT compliance, and association of discharge LLT and outcomes**

LLT management and compliance of the included patients during hospitalization, at discharge, 3 months, 6 months, and 12 months were shown in **Table 3**.

**Table 3. Lipid-lowering Treatment (LLT) and the compliance of patients in**

#### **CNSR-III**

|         | Hospitalization | Discharge    | 3 months     | 6 months     | 12 months    |
|---------|-----------------|--------------|--------------|--------------|--------------|
| Non LLT | 547 (3.6)       | 1300 (8.6)   | 2590 (17.4)  | 3007 (22.4)  | 3754 (26.0)  |
| LLT     | 14506 (96.4)    | 13831 (91.4) | 12271 (82.6) | 11726 (77.6) | 10682 (74.0) |

#### **Compliance**

|                |   |   |              |              |             |
|----------------|---|---|--------------|--------------|-------------|
| Non-Persistent | / | / | 2147 (15.5)  | 3382 (24.5)  | 4863 (35.2) |
| Persistent     | / | / | 11684 (84.5) | 10449 (75.6) | 8968 (64.8) |

Over 90% of patients received LLT during hospitalization and 2 weeks after

discharge. The LLT compliance was 84.5% at 3 months, 75.6% at 6 months, and

64.8% at 12 months. The drug regimens of lipid-lowering treatment of the patients in

CNSR-III in 3 months, 6 months, and 12 months were shown in **Table 4**.

**Table 4. Lipid-lowering Treatment of the included patients in CNSR-III at 3-month, 6-month, 12-month follow-up (n=15166)**

| Treatment    | Patients with statins, N (%) |              |              |              |              |
|--------------|------------------------------|--------------|--------------|--------------|--------------|
|              | Hospitalization              | Discharge    | 3 months     | 6 months     | 12 months    |
| Atorvastatin | 10527 (69.41)                | 9851 (64.95) | 8656 (57.08) | 8228 (54.25) | 7470 (49.25) |
| <40mg        | 7442 (70.71)                 | 8770 (89.03) | 8284 (95.7)  | 7963 (96.78) | 7269 (97.35) |
| ≥40mg        | 3083 (29.29)                 | 1081 (10.97) | 372 (4.3)    | 265 (3.22)   | 198 (2.65)   |
| Rosuvastatin | 3546 (23.38)                 | 3395 (22.39) | 2903 (19.14) | 2779 (18.32) | 2489 (16.41) |
| <20mg        | 2876 (81.15)                 | 2983 (87.86) | 2650 (91.38) | 2536 (91.29) | 2313 (92.93) |
| ≥20mg        | 668 (18.85)                  | 412 (12.14)  | 250 (8.62)   | 242 (8.71)   | 176 (7.07)   |
| Simvastatin  | 272 (1.79)                   | 239 (1.58)   | 390 (2.57)   | 411 (2.71)   | 444 (2.93)   |
| Pravastatin  | 166 (1.09)                   | 165 (1.09)   | 137 (0.9)    | 128 (0.84)   | 100 (0.66)   |
| lovastatin   | 25 (0.16)                    | 24 (0.16)    | 33 (0.22)    | 33 (0.22)    | 30 (0.2)     |
| Fluvastatin  | 54 (0.36)                    | 53 (0.35)    | 52 (0.34)    | 43 (0.28)    | 47 (0.31)    |
| Pravastatin  | 61 (0.40)                    | 78 (0.51)    | 70 (0.46)    | 64 (0.42)    | 61 (0.4)     |

Compared with the non-discharge LLT group, LLT at discharge was associated with

reduced risk of ischemic stroke (HR=0.65, 95% CI: 0.45-0.94, p=0.02) and stroke

recurrence (HR=0.69, 95% CI: 0.48-0.99, p=0.04) at 3 months (**Table 5**).

**Table 5. The association of Discharge Lipid Lowering Therapy (LLT) and outcomes**

|                           | Total | Events, (n%) | HR (95% CI) Unadjusted | P value | HR (95% CI) Adjusted | P value |
|---------------------------|-------|--------------|------------------------|---------|----------------------|---------|
| <b>3 months</b>           |       |              |                        |         |                      |         |
| <b>Stroke recurrence</b>  |       |              |                        |         |                      |         |
| Discharge LLT             | 13248 | 269 (2.0%)   | 0.68(0.48-0.96)        | 0.03    | 0.69(0.48-0.99)      | 0.04    |
| Non discharge LLT         | 1181  | 35 (3.0%)    | Reference              |         | Reference            |         |
| <b>Ischemic stroke</b>    |       |              |                        |         |                      |         |
| Discharge LLT             | 13263 | 245 (1.9%)   | 0.68(0.47-0.98)        | 0.04    | 0.65(0.45-0.94)      | 0.02    |
| Non discharge LLT         | 1188  | 32 (2.7%)    | Reference              |         | Reference            |         |
| <b>Hemorrhagic stroke</b> |       |              |                        |         |                      |         |

|                           |       |            |                  |       |                 |      |
|---------------------------|-------|------------|------------------|-------|-----------------|------|
| Discharge LLT             | 13740 | 31 (0.2%)  | 0.71(0.25-2.01)  | 0.52  | 1.19(0.36-3.98) | 0.78 |
| Non discharge LLT         | 1266  | 4 (0.3%)   | Reference        |       | Reference       |      |
| <b>MACE</b>               |       |            |                  |       |                 |      |
| Discharge LLT             | 13248 | 299 (2.3%) | 0.71(0.51-1.003) | 0.052 | 0.74(0.52-1.04) | 0.08 |
| Non discharge LLT         | 1181  | 37 (3.1%)  | Reference        |       | Reference       |      |
| <b>12 months</b>          |       |            |                  |       |                 |      |
| <b>Stroke recurrence</b>  |       |            |                  |       |                 |      |
| Discharge LLT             | 13248 | 758 (5.7%) | 0.88(0.7-1.12)   | 0.30  | 0.89(0.7-1.14)  | 0.36 |
| Non discharge LLT         | 1181  | 75 (6.4%)  | Reference        |       | Reference       |      |
| <b>Ischemic stroke</b>    |       |            |                  |       |                 |      |
| Discharge LLT             | 13263 | 683 (5.2%) | 0.87(0.68-1.11)  | 0.26  | 0.86(0.67-1.10) | 0.23 |
| Non discharge LLT         | 1188  | 69 (5.8%)  | Reference        |       | Reference       |      |
| <b>Hemorrhagic stroke</b> |       |            |                  |       |                 |      |
| Discharge LLT             | 13740 | 86 (0.6%)  | 0.97(0.47-2.00)  | 0.94  | 1.23(0.56-2.69) | 0.60 |
| Non discharge LLT         | 1266  | 8 (0.6%)   | Reference        |       | Reference       |      |
| <b>MACE</b>               |       |            |                  |       |                 |      |
| Discharge LLT             | 13248 | 838 (6.3%) | 0.94(0.75-1.19)  | 0.60  | 0.96(0.76-1.21) | 0.72 |
| Non discharge LLT         | 1181  | 78(6.6%)   | Reference        |       | Reference       |      |

Patients who reached the end point (stroke recurrence or MACE, death, and loss to follow-up) during hospitalization were excluded.

### **LDL-C goal achievement and change of LDL-C from baseline to 3 months with outcomes at 12 months**

The overall blood lipid level at baseline, 3-month, and 12-month follow-up were shown in **Table 6**. LDL-C goal achievement for 1.8mmol/L were 28.3% at baseline, 46.7% at 3 months, and 35.4% at 12 months, respectively; while LDL-C goal achievement for 1.4mmol/L were 13.1% at baseline, 25.6% at 3 months, and 17.6% at 12 months, respectively.

**Table 6. Blood Lipid Level of the included patients at baseline, 3 months and 1 year in CNSR-III**

| Lipids, mmol/L                     | Baseline<br>N=10738 | 3M<br>N=6034    | 12M<br>N=4899   |
|------------------------------------|---------------------|-----------------|-----------------|
| Median triglycerides (IQR), mmol/L | 1.37(1.03-1.87)     | 1.32(0.98-1.81) | 1.46(1.04-2.16) |
| Total cholesterol, mmol/L          | 3.97(3.31-4.72)     | 3.74(3.13-4.54) | 3.92(3.25-4.76) |
| HDL-C, mmol/L                      | 0.93(0.78-1.12)     | 1.02(0.86-1.21) | 0.99(0.79-1.2)  |
| LDL-C, mmol/L                      | 2.31(1.73-2.97)     | 1.87(1.39-2.55) | 2.14(1.57-2.87) |
| LDL <1.4mmol/L, n (%)              | 1407 (13.1)         | 1547 (25.6)     | 862 (17.6)      |
| 1.4 < LDL ≤1.8mmol/L, n (%)        | 1636 (15.2)         | 1272 (21.1)     | 872 (17.8)      |

|                               |             |             |             |
|-------------------------------|-------------|-------------|-------------|
| 1.8 < LDL ≤ 2.6 mmol/L, n (%) | 3655 (34.0) | 1785 (29.6) | 1533 (31.3) |
| LDL > 2.6 mmol/L, n (%)       | 4040 (37.6) | 1430 (23.7) | 1632 (33.3) |

HDL-C: high-density lipoprotein cholesterol. LDL-C: low-density lipoprotein cholesterol.

We did not find that the LDL-C reduction rate from baseline to 3-month follow-up was associated with reduced risk of stroke and MACE at 12 months (Table 7).

**Table 7. Association of change of LDL-C from baseline to 3 months with outcomes at 12 months**

| Percentage of LDL level decrease (compared to baseline) | Total | Events, (n%) | HR (95% CI) unadjusted | P value | HR (95% CI) adjusted | P value |
|---------------------------------------------------------|-------|--------------|------------------------|---------|----------------------|---------|
| <b>12 months</b>                                        |       |              |                        |         |                      |         |
| <b>Stroke recurrence*</b>                               |       |              |                        |         |                      |         |
| <30%, n (%)                                             | 3526  | 137 (3.9)    | 1.48 (0.92-2.39)       | 0.11    | 1.42 (0.87-2.30)     | 0.16    |
| 30-50%, n (%)                                           | 1146  | 45 (3.9)     | 1.50 (0.88-2.56)       | 0.14    | 1.44 (0.84-2.47)     | 0.19    |
| >50%, n (%)                                             | 718   | 19 (2.7)     | Reference              |         | Reference            |         |
| <b>MACE‡</b>                                            |       |              |                        |         |                      |         |
| <30%, n (%)                                             | 3526  | 149 (4.2)    | 1.46 (0.92-2.20)       | 0.11    | 1.39 (0.88-2.21)     | 0.16    |
| 30-50%, n (%)                                           | 1146  | 47 (4.1)     | 1.41 (0.84-2.36)       | 0.19    | 1.36 (0.81-2.28)     | 0.24    |
| >50%, n (%)                                             | 718   | 21 (2.9)     | Reference              |         | Reference            |         |

\* Patients with stroke recurrence, death, and loss to follow-up within 3 months were excluded.

‡ Patients with MACE, death, and loss to follow-up within 3 months were excluded.

## Discussion

This national hospital-based study described the current LDL level and LLT of stroke patients in the real world. We described the LLT management and LDL-C goal achievement and found that lowered baseline LDL-C level was associated with a decreased risk of new ischaemic stroke and MACE at both 3 months and 12 months, without increasing risk of intracranial hemorrhage. In addition, LLT at discharge was associated with a reduced risk of CV events at 3 and 12 months. Our study may have important clinical implications with the large sample size of LDL-C levels of stroke patients and comprehensive prognostic characteristics recorded.

1  
2  
3  
4 Firstly, LDL-C of 1.4 mmol/l might be a reasonable target for the high-risk  
5  
6 population. Our study indicated that the LDL $\leq$ 1.4 mmol/L group, with the highest risk  
7  
8 factors, developed the lowest stroke and MACE at 3 and 12 months. The paradox of  
9  
10 high risk of stroke with low LDL-C level could be due to the previous intensive LLT  
11  
12 and rigid LDL-C control. It is consistent with the previous study that fixed-dose statin  
13  
14 regimens are less effective than targeting LDL-C levels of 1.8 or 1.4 mmol/l when  
15  
16 pre-treatment LDL-C levels exceed 4 mmol/L <sup>16</sup>. The target LDL-C of 1.4 mmol/l  
17  
18 recently advocated in particularly high-risk patients is most effective when pre-  
19  
20 treatment LDL-C exceeds about 3 mmol/l <sup>16</sup>. The TST trial found that an intensive  
21  
22 LDL-C lowering target of less than 1.8 mmol/L further reduced the risk of  
23  
24 cardiovascular events by approximately 20% during a median follow-up of 3.5 years  
25  
26 in patients with ischaemic stroke within 3 months or a TIA within 15 days, compared  
27  
28 with the higher target of 2.3–2.8mmol/L.<sup>3</sup> 2019 ESC/EAS Guidelines for the  
29  
30 management of dyslipidaemias set the most aggressive target of less than 1.4 mmol/L  
31  
32 and a reduction of more than 50% in LDL-C <sup>17</sup>.

33  
34  
35  
36  
37  
38  
39  
40  
41  
42  
43 Secondly, our findings proved the safety of the LDL-C level lower than 1.4mmol/L in  
44  
45 Chinese people: it did not associate with an increased risk of hemorrhagic stroke.

46  
47  
48  
49  
50  
51  
52  
53  
54  
55  
56  
57  
58  
59  
60  
Studies of LDL-C and ICH have reported conflicting results. In a twenty-year  
epidemiologic study, an excess risk of hemorrhagic stroke was observed in patients  
with uncontrolled hypertension and LDL-C <70 mg/dL (1.8mmol/L) <sup>18</sup>. However, in  
subgroup analysis of FOURIER trial <sup>19</sup>, among patients with prior stroke, the risk of  
hemorrhagic stroke did not increase, even when the median LDL-C decreased from

1  
2  
3  
4 2.4 mmol/L at randomization to 0.8 (0.5–1.2) mmol/L at 48 weeks in the evolocumab  
5  
6  
7 group. All stroke and ischemic stroke were reduced, with no difference in  
8  
9 hemorrhagic stroke. Meanwhile, in a systematic review and meta-analysis, the higher  
10  
11 level of LDL-C seemed to be associated with a lower risk of hemorrhagic stroke <sup>20</sup>.  
12  
13 Our study proved the efficacy and safety of that baseline LDL-C of <1.4 mmol/L in  
14  
15 stroke patients, providing evidence for the first and second prevention strategies.  
16  
17  
18 Thirdly, we described the epidemiological characteristics of LDL-C levels and LLT of  
19  
20 Chinese stroke patients. Compared to the study conducted in 2013 <sup>21</sup>, our study  
21  
22 indicated some progress in blood lipid management in mainland China. In our study,  
23  
24 about 97% of patients had a medication history of LLT before onset. Compared to the  
25  
26 LLT rate of 79.6% in 2013, over 90% of patients received LLT during hospitalization  
27  
28 and at discharge; the LLT compliance was 84.5% at 3 months, 75.6% at 6 months,  
29  
30 and 64.8% at 12 months. In addition, LDL-C goal achievement for 1.8mmol/L had  
31  
32 improved mildly, increasing from 27.4% to 35.4%, while LDL-C goal achievement  
33  
34 for 1.4mmol/L was 17.6% at 12 months. The non-ideal LLT compliance and LDL-C  
35  
36 control rate might be due to statin intolerance in Asian people, including statin-  
37  
38 associated myopathy and hemorrhagic stroke <sup>22,23</sup>. A meta-analysis indicated that  
39  
40 statins increase the risk of hemorrhagic stroke in a medication dose-dependent and  
41  
42 type of index brain vascular injury-dependent manner, while PCSK9 inhibitors do not  
43  
44 increase hemorrhagic stroke risk<sup>24</sup>. Thus, statins, rather than low-leveled LDL-C,  
45  
46 might closely relate to hemorrhagic stroke. PCSK9 inhibitors might be a more  
47  
48 promising lipid-lowering medication class in patients with an elevated risk of  
49  
50  
51  
52  
53  
54  
55  
56  
57  
58  
59  
60

1  
2  
3  
4 hemorrhagic stroke. In addition, our analysis revealed a significant association  
5  
6 between LLT at discharge and 3-month outcomes, indicating the importance of early  
7  
8 LLT.  
9

10  
11 Fourthly, we did not observe the correlation between the 3-month LDL-C decrease  
12  
13 amplitude and 12-month outcomes. To analyze the association of 3-month LDL-C  
14  
15 change with 12-month outcomes, we excluded subjects who reached the end point  
16  
17 within 3 months, which led to a limited sample size and loss of a considerable amount  
18  
19 of target events, for most stroke recurrences happened within 3 months<sup>25</sup>. Another  
20  
21 critical factor was that we could not adjust some risk factors in the model, such as IL-  
22  
23 6 level and relevant intracranial artery stenosis (ICAS). They were independent risk  
24  
25 factors of the residual risk. Although substantially reduced by secondary prevention  
26  
27 treatment, there was still 8.3% residual risk of 12-month recurrent stroke even in  
28  
29 patients with persistent adherence to guideline-based secondary stroke prevention<sup>26</sup>.  
30  
31

32  
33 Our study has several limitations. First, only LLT medication use at the follow-up  
34  
35 time point was recorded, not the details of use during the whole trial, such as  
36  
37 continuous use, intermittent use, and the change of dose; thus, lipid-lowering agents  
38  
39 use at 3 months and 12 months could not represent the actual situation. Second, statin  
40  
41 use before admission was not recorded in the trial and may confound the results.  
42  
43

44  
45 Details of medication use, such as class, dose, duration, and adherence of lipid-  
46  
47 lowering agents, did not enter the regression model. Third, there could be some  
48  
49 undetected confounding factors except for residual risk. Additionally, the trial was  
50  
51 conducted exclusively on Chinese patients. The finding in this study needs to be  
52  
53  
54  
55  
56  
57  
58  
59  
60

1  
2  
3  
4 further validated in studies with a larger sample size and non-Asian populations.  
5

## 6 **Conclusions**

7  
8  
9 The LDL-C goal achievement has increased mildly in the stroke and TIA population  
10  
11 in mainland China and improving of the LDL-C goal achievement is still an essential  
12  
13 task for secondary prevention of stroke. The lowered baseline LDL-C level was  
14  
15 significantly associated with a decreased short-and long-term risk of ischemic stroke  
16  
17 among stroke and TIA patients. LDL-C<1.4mmol/L could be a safe standard for this  
18  
19 population.  
20  
21  
22  
23

## 24 **Ethics Approval Statement**

25  
26  
27 The study protocol of the CNSR-III was approved by the ethics committee at Beijing  
28  
29 Tiantan Hospital (IRB approval number: KY2015-001-01) and all participating  
30  
31 centers. Every participant provided written informed consent before participation.  
32  
33  
34

## 35 **Acknowledgement**

36  
37 We thank Drs. Feng Sheng and Luan-Luan Sun for their important intellectual  
38  
39 contributions to the article. We thank all participating hospitals, their physicians, and  
40  
41 nurses. We appreciate all the patients who took part in the CNSR-III trial.  
42  
43  
44

## 45 **Competing Interests**

46  
47  
48 The authors have no conflicts of interest to declare.  
49  
50

## 51 **Funding Sources**

52  
53  
54 This work was supported by the National Key R&D Program of China (No.  
55  
56 2018YFC1312903), National Natural Science Foundation of China (No. 81870905,  
57  
58  
59  
60



1  
2  
3  
4 82071295, 81801139), and Beijing Hospitals Authority Innovation Studio of Young  
5  
6 Staff Funding Support (Code: 202113).  
7  
8

### 9 **Contributorship statement**

10  
11 (I) Conception and design: Drs. YY Xu and WQ Chen  
12  
13

14  
15 (II) Administrative support: Drs. X Meng  
16  
17

18 (III) Provision of study materials or patients: Drs. X Meng, ZX Li  
19  
20

21 (IV) Collection and assembly of data: Drs. X Meng, XQ Zhao, LP Liu, and YL Wang  
22  
23

24 (V) Data analysis and interpretation: Drs. MX Wang and YS Pan  
25  
26

27 (VI) Manuscript writing: All authors.  
28  
29

30 (VII) Final approval of manuscript: All authors.  
31  
32

### 33 **Data sharing statement**

34  
35 The datasets used in this study are not publicly available, but these can be provided on  
36  
37 reasonable request after the approval.  
38  
39  
40  
41  
42  
43  
44  
45  
46  
47  
48  
49  
50  
51  
52  
53  
54  
55  
56  
57  
58  
59  
60

## Reference

1. Wang Y-J, Li Z-X, Gu H-Q, Zhai Y, Jiang Y, Zhao X-Q, Wang Y-L, Yang X, Wang C-J, Meng X, et al. China Stroke Statistics 2019: A Report From the National Center for Healthcare Quality Management in Neurological Diseases, China National Clinical Research Center for Neurological Diseases, the Chinese Stroke Association, National Center for Chronic and Non-communicable Disease Control and Prevention, Chinese Center for Disease Control and Prevention and Institute for Global Neuroscience and Stroke Collaborations. *Stroke Vasc. Neurol.* 2020;5:211–239.
2. Amarenco P, Bogousslavsky J, Callahan A 3rd, Goldstein LB, Hennerici M, Rudolph AE, Sillesen H, Simunovic L, Szarek M, Welch KMA, et al. High-dose atorvastatin after stroke or transient ischemic attack. *N. Engl. J. Med.* 2006;355:549–559.
3. Amarenco P, Kim JS, Labreuche J, Charles H, Abtan J, Béjot Y, Cabrejo L, Cha J-K, Ducrocq G, Giroud M, et al. A Comparison of Two LDL Cholesterol Targets after Ischemic Stroke. *N. Engl. J. Med.* 2020;382:9.
4. Klijn CJ, Paciaroni M, Berge E, Korompoki E, Kõrv J, Lal A, Putaala J, Werring DJ. Antithrombotic treatment for secondary prevention of stroke and other thromboembolic events in patients with stroke or transient ischemic attack and non-valvular atrial fibrillation: A European Stroke Organisation guideline. *Eur. stroke J.* 2019;4:198–223.

- 1  
2  
3  
4 5. Kleindorfer DO, Towfighi A, Chaturvedi S, Cockcroft KM, Gutierrez J,  
5  
6 Lombardi-Hill D, Kamel H, Kernan WN, Kittner SJ, Leira EC, et al. 2021  
7  
8  
9 Guideline for the Prevention of Stroke in Patients with Stroke and Transient  
10  
11 Ischemic Attack: A Guideline From the American Heart Association/American  
12  
13 Stroke Association. *Stroke*. 2021;52:e364–e467.  
14  
15  
16
- 17 6. Amarenco P, Kim JS, Labreuche J, Giroud M, Lee BC, Mahagne MH,  
18  
19 Nighoghossian N, Simon T, Steg PG, Touboul PJ, et al. Treat stroke to target  
20  
21 trial design: First trial comparing two LDL targets in patients with  
22  
23 atherothrombotic strokes. *Eur. Stroke J*. 2019;4:271–280.  
24  
25  
26
- 27 7. Qureshi AI, Caplan LR. Intracranial atherosclerosis. *Lancet (London,*  
28  
29 *England)*. 2014;383:984–998.  
30  
31  
32
- 33 8. Wong LKS. Global burden of intracranial atherosclerosis. *Int. J. stroke Off. J.*  
34  
35 *Int. Stroke Soc*. 2006;1:158–159.  
36  
37  
38
- 39 9. Mok V, Srikanth V, Xiong Y, Phan TG, Moran C, Chu S, Zhao Q, Chu WWC,  
40  
41 Wong A, Hong Z, et al. Race-ethnicity and cerebral small vessel disease--  
42  
43 comparison between Chinese and White populations. *Int. J. stroke Off. J. Int.*  
44  
45 *Stroke Soc*. 2014;9 Suppl A1:36–42.  
46  
47  
48
- 49 10. Wolma J, Nederkoorn PJ, Goossens A, Vergouwen MDI, van Schaik IN,  
50  
51 Vermeulen M. Ethnicity a risk factor? The relation between ethnicity and large-  
52  
53 and small-vessel disease in White people, Black people, and Asians within a  
54  
55 hospital-based population. *Eur. J. Neurol*. 2009;16:522–527.  
56  
57  
58  
59  
60

- 1  
2  
3  
4 11. Collins R, Armitage J, Parish S, Sleight P, Peto R. Effects of cholesterol-  
5  
6 lowering with simvastatin on stroke and other major vascular events in 20536  
7  
8 people with cerebrovascular disease or other high-risk conditions. *Lancet*  
9  
10  
11  
12  
13  
14  
15 12. Oyama K, Giugliano RP, Blazing MA, Park J-G, Tershakovec AM, Sabatine  
16  
17 MS, Cannon CP, Braunwald E. Baseline Low-Density Lipoprotein Cholesterol  
18  
19 and Clinical Outcomes of Combining Ezetimibe with Statin Therapy in  
20  
21  
22 IMPROVE-IT. *J. Am. Coll. Cardiol.* 2021;78:1499–1507.  
23  
24  
25  
26 13. Sabatine MS, Giugliano RP, Keech AC, Honarpour N, Wiviott SD, Murphy  
27  
28 SA, Kuder JF, Wang H, Liu T, Wasserman SM, et al. Evolocumab and Clinical  
29  
30 Outcomes in Patients with Cardiovascular Disease. *N. Engl. J. Med.*  
31  
32  
33  
34 2017;376:1713–1722.  
35  
36  
37 14. McKenney JM, Koren MJ, Kereiakes DJ, Hanotin C, Ferrand A-C, Stein EA.  
38  
39 Safety and efficacy of a monoclonal antibody to proprotein convertase  
40  
41 subtilisin/kexin type 9 serine protease, SAR236553/REGN727, in patients with  
42  
43 primary hypercholesterolemia receiving ongoing stable atorvastatin therapy. *J.*  
44  
45  
46  
47  
48  
49  
50 15. Wang Y, Jing J, Meng X, Pan Y, Wang Y, Zhao X, Lin J, Li W, Jiang Y, Li Z,  
51  
52 et al. The Third China National Stroke Registry (CNSR-III) for patients with  
53  
54 acute ischaemic stroke or transient ischaemic attack: design, rationale and  
55  
56  
57  
58  
59  
60 baseline patient characteristics. *Stroke Vasc. Neurol.* 2019;4:158–164.

- 1  
2  
3  
4 16. Soran H, Adam S, Durrington PN. Optimising treatment of hyperlipidaemia:  
5  
6 Quantitative evaluation of UK, USA and European guidelines taking account  
7  
8 of both LDL cholesterol levels and cardiovascular disease risk. *Atherosclerosis*.  
9  
10 2018;278:135–142.  
11  
12  
13  
14  
15 17. (EAS) TTF for the management of dyslipidaemias of the ESC (ESC) and  
16  
17 EAS. 2019 ESC/EAS guidelines for the management of dyslipidaemias: Lipid  
18  
19 modification to reduce cardiovascular risk. *Atherosclerosis*. 2019;290:140–205.  
20  
21  
22  
23  
24 18. Zhang X, Liu J, Wang M, Qi Y, Sun J, Liu J, Wang Y, Hao Y, Li Y, Zhou M,  
25  
26 et al. Twenty-year epidemiologic study on LDL-C levels in relation to the risks  
27  
28 of atherosclerotic event, hemorrhagic stroke, and cancer death among young  
29  
30 and middle-aged population in China. *J. Clin. Lipidol.* 2018;12:1179-1189.e4.  
31  
32  
33  
34  
35 19. Giugliano RP, Pedersen TR, Saver JL, Sever PS, Keech AC, Bohula EA,  
36  
37 Murphy SA, Wasserman SM, Honarpour N, Wang H, et al. Stroke Prevention  
38  
39 With the PCSK9 (Proprotein Convertase Subtilisin-Kexin Type 9) Inhibitor  
40  
41 Evolocumab Added to Statin in High-Risk Patients With Stable  
42  
43 Atherosclerosis. *Stroke*. 2020;51:1546–1554.  
44  
45  
46  
47  
48 20. Wang X, Dong Y, Qi X, Huang C, Hou L. Cholesterol levels and risk of  
49  
50 hemorrhagic stroke: a systematic review and meta-analysis. *Stroke*.  
51  
52 2013;44:1833–1839.  
53  
54  
55  
56  
57  
58  
59  
60

- 1  
2  
3  
4 21. Wang C-J, Wang Y-L, Li Z-X, Wang Y-J. The Management of LDL  
5  
6 Cholesterol and Predictors of Goal Achievement in Stroke Patients in China: A  
7  
8 Cross-Sectional Study. *CNS Neurosci. Ther.* 2016;22:577–583.  
9  
10  
11  
12 22. Tomlinson B, Chan P, Liu Z-M. Statin Responses in Chinese Patients. *J.*  
13  
14 *Atheroscler. Thromb.* 2018;25:199–202.  
15  
16  
17  
18 23. Tomlinson B, Chan P, Liu Z-M. Statin Intolerance-An Asian Perspective. *J.*  
19  
20 *Atheroscler. Thromb.* 2020;27:485–488.  
21  
22  
23  
24 24. Sanz-Cuesta BE, Saver JL. Lipid-Lowering Therapy and Hemorrhagic Stroke  
25  
26 Risk: Comparative Meta-Analysis of Statins and PCSK9 Inhibitors. *Stroke.*  
27  
28 2021;52:3142–3150.  
29  
30  
31  
32 25. Coull AJ, Lovett JK, Rothwell PM. Population based study of early risk of  
33  
34 stroke after transient ischaemic attack or minor stroke: implications for public  
35  
36 education and organisation of services. *BMJ.* 2004;328:326.  
37  
38  
39  
40 26. Pan Y, Li Z, Li J, Jin A, Lin J, Jing J, Li H, Meng X, Wang Y, Wang Y.  
41  
42 Residual Risk and Its Risk Factors for Ischemic Stroke with Adherence to  
43  
44 Guideline-Based Secondary Stroke Prevention. *J. stroke.* 2021;23:51–60.  
45  
46  
47  
48  
49  
50  
51  
52  
53  
54  
55  
56  
57  
58  
59  
60

**Figure 1. Dose-response-relationship curves**

Adjusted odds ratio of events and MACE at 3 months and 12 months according to LDL-C at baseline in patients. (a) stroke at 3 months; (b) ischemic stroke at 3 months; (c) hemorrhagic stroke at 3 months; (d) MACE at 3 months; (e) stroke at 12 months; (f) ischemic stroke at 12 months; (g) hemorrhagic stroke at 12 months; (h) MACE at 12 months. The full line indicates the adjusted hazard ratio and the dashed lines the 95% confidence interval bands. Reference is LDL-C >2.6mmol/L. Data were fitted using a logistic regression model of restricted cubic spline with three knots (the 5th, 50th, 90th percentiles) for LDL-C level, adjusting for potential covariates.

1  
2  
3  
4  
5  
6  
7  
8  
9  
10  
11  
12  
13  
14  
15  
16  
17  
18  
19  
20  
21  
22  
23  
24  
25  
26  
27  
28  
29  
30  
31  
32  
33  
34  
35  
36  
37  
38  
39  
40  
41  
42  
43  
44  
45  
46  
47  
48  
49  
50  
51  
52  
53  
54  
55  
56  
57  
58  
59  
60

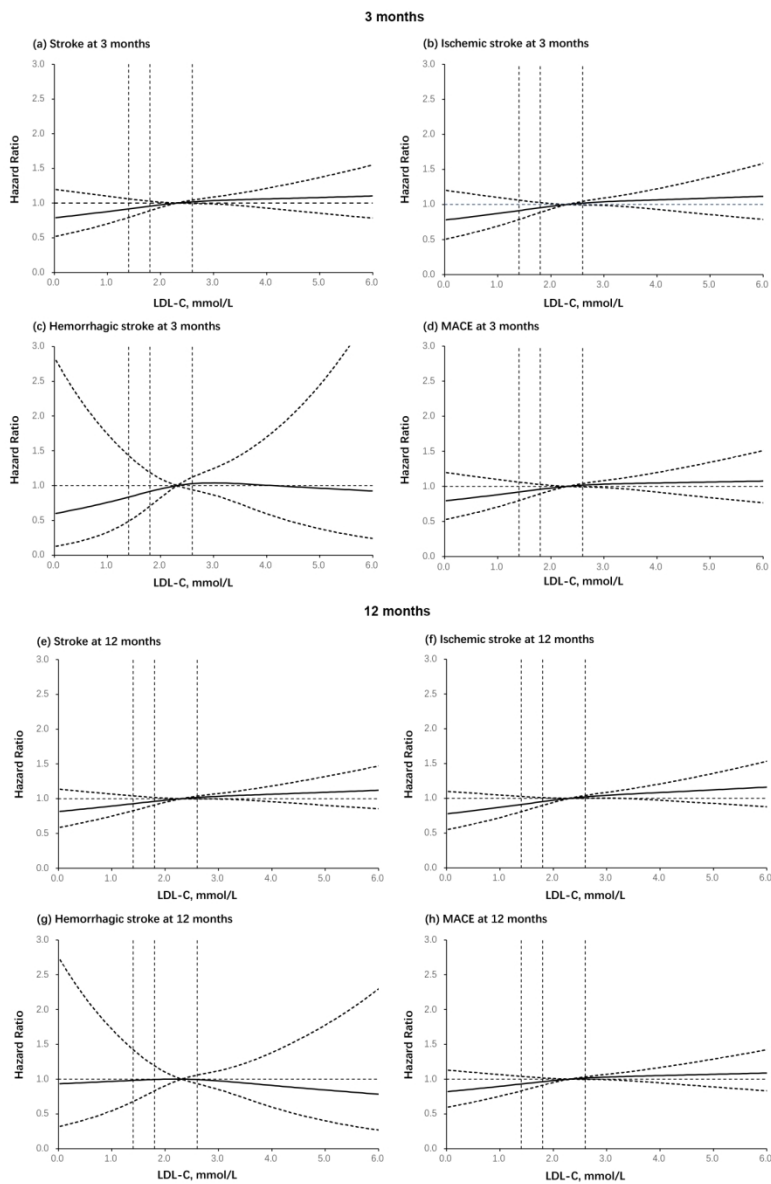

Dose-response-relationship curves



STROBE Statement—Checklist of items that should be included in reports of *cohort studies*

|                           | Item No | Recommendation                                                                                                                                                                                    | Page No |
|---------------------------|---------|---------------------------------------------------------------------------------------------------------------------------------------------------------------------------------------------------|---------|
| <b>Title and abstract</b> | 1       | (a) Indicate the study's design with a commonly used term in the title or the abstract                                                                                                            | 1       |
|                           |         | (b) Provide in the abstract an informative and balanced summary of what was done and what was found                                                                                               | 3       |
| <b>Introduction</b>       |         |                                                                                                                                                                                                   |         |
| Background/rationale      | 2       | Explain the scientific background and rationale for the investigation being reported                                                                                                              | 5       |
| Objectives                | 3       | State specific objectives, including any prespecified hypotheses                                                                                                                                  | 6       |
| <b>Methods</b>            |         |                                                                                                                                                                                                   |         |
| Study design              | 4       | Present key elements of study design early in the paper                                                                                                                                           | 7       |
| Setting                   | 5       | Describe the setting, locations, and relevant dates, including periods of recruitment, exposure, follow-up, and data collection                                                                   | 8       |
| Participants              | 6       | (a) Give the eligibility criteria, and the sources and methods of selection of participants. Describe methods of follow-up                                                                        | 7       |
|                           |         | (b) For matched studies, give matching criteria and number of exposed and unexposed                                                                                                               | N/A     |
| Variables                 | 7       | Clearly define all outcomes, exposures, predictors, potential confounders, and effect modifiers. Give diagnostic criteria, if applicable                                                          | 8       |
| Data sources/measurement  | 8*      | For each variable of interest, give sources of data and details of methods of assessment (measurement). Describe comparability of assessment methods if there is more than one group              | 8       |
| Bias                      | 9       | Describe any efforts to address potential sources of bias                                                                                                                                         | 9       |
| Study size                | 10      | Explain how the study size was arrived at                                                                                                                                                         | 8       |
| Quantitative variables    | 11      | Explain how quantitative variables were handled in the analyses. If applicable, describe which groupings were chosen and why                                                                      | 10      |
| Statistical methods       | 12      | (a) Describe all statistical methods, including those used to control for confounding                                                                                                             | 10      |
|                           |         | (b) Describe any methods used to examine subgroups and interactions                                                                                                                               | 10      |
|                           |         | (c) Explain how missing data were addressed                                                                                                                                                       | 10      |
|                           |         | (d) If applicable, explain how loss to follow-up was addressed                                                                                                                                    | 11      |
|                           |         | (e) Describe any sensitivity analyses                                                                                                                                                             | N/A     |
| <b>Results</b>            |         |                                                                                                                                                                                                   |         |
| Participants              | 13*     | (a) Report numbers of individuals at each stage of study—eg numbers potentially eligible, examined for eligibility, confirmed eligible, included in the study, completing follow-up, and analysed | 11      |
|                           |         | (b) Give reasons for non-participation at each stage                                                                                                                                              | N/A     |
|                           |         | (c) Consider use of a flow diagram                                                                                                                                                                | N/A     |
| Descriptive data          | 14*     | (a) Give characteristics of study participants (eg demographic, clinical, social) and information on exposures and potential confounders                                                          | 11      |
|                           |         | (b) Indicate number of participants with missing data for each variable of interest                                                                                                               | N/A     |
|                           |         | (c) Summarise follow-up time (eg, average and total amount)                                                                                                                                       | 12      |
| Outcome data              | 15*     | Report numbers of outcome events or summary measures over time                                                                                                                                    | 13      |

|    |                          |    |                                                                                                                                                                                                              |    |
|----|--------------------------|----|--------------------------------------------------------------------------------------------------------------------------------------------------------------------------------------------------------------|----|
| 1  | Main results             | 16 | (a) Give unadjusted estimates and, if applicable, confounder-adjusted estimates and their precision (eg, 95% confidence interval). Make clear which confounders were adjusted for and why they were included | 13 |
| 2  |                          |    | (b) Report category boundaries when continuous variables were categorized                                                                                                                                    | 13 |
| 3  |                          |    | (c) If relevant, consider translating estimates of relative risk into absolute risk for a meaningful time period                                                                                             | 14 |
| 4  |                          |    |                                                                                                                                                                                                              |    |
| 5  | Other analyses           | 17 | Report other analyses done—eg analyses of subgroups and interactions, and sensitivity analyses                                                                                                               | 14 |
| 6  |                          |    |                                                                                                                                                                                                              |    |
| 7  |                          |    |                                                                                                                                                                                                              |    |
| 8  |                          |    |                                                                                                                                                                                                              |    |
| 9  |                          |    |                                                                                                                                                                                                              |    |
| 10 |                          |    |                                                                                                                                                                                                              |    |
| 11 | <b>Discussion</b>        |    |                                                                                                                                                                                                              |    |
| 12 | Key results              | 18 | Summarise key results with reference to study objectives                                                                                                                                                     | 17 |
| 13 | Limitations              | 19 | Discuss limitations of the study, taking into account sources of potential bias or imprecision. Discuss both direction and magnitude of any potential bias                                                   | 20 |
| 14 |                          |    |                                                                                                                                                                                                              |    |
| 15 | Interpretation           | 20 | Give a cautious overall interpretation of results considering objectives, limitations, multiplicity of analyses, results from similar studies, and other relevant evidence                                   | 18 |
| 16 |                          |    |                                                                                                                                                                                                              |    |
| 17 | Generalisability         | 21 | Discuss the generalisability (external validity) of the study results                                                                                                                                        | 18 |
| 18 |                          |    |                                                                                                                                                                                                              |    |
| 19 |                          |    |                                                                                                                                                                                                              |    |
| 20 |                          |    |                                                                                                                                                                                                              |    |
| 21 | <b>Other information</b> |    |                                                                                                                                                                                                              |    |
| 22 | Funding                  | 22 | Give the source of funding and the role of the funders for the present study and, if applicable, for the original study on which the present article is based                                                | 21 |
| 23 |                          |    |                                                                                                                                                                                                              |    |
| 24 |                          |    |                                                                                                                                                                                                              |    |

\*Give information separately for exposed and unexposed groups.

**Note:** An Explanation and Elaboration article discusses each checklist item and gives methodological background and published examples of transparent reporting. The STROBE checklist is best used in conjunction with this article (freely available on the Web sites of PLoS Medicine at <http://www.plosmedicine.org/>, Annals of Internal Medicine at <http://www.annals.org/>, and Epidemiology at <http://www.epidem.com/>). Information on the STROBE Initiative is available at <http://www.strobe-statement.org>.

# BMJ Open

## Lipid Management in Ischemic Stroke or Transient Ischemic Attack in China: Result from China National Stroke Registry III

|                                 |                                                                                                                                                                                                                                                                                                                                                                                                                                                                                                                                                                                                                                                                                                                                                                                                         |
|---------------------------------|---------------------------------------------------------------------------------------------------------------------------------------------------------------------------------------------------------------------------------------------------------------------------------------------------------------------------------------------------------------------------------------------------------------------------------------------------------------------------------------------------------------------------------------------------------------------------------------------------------------------------------------------------------------------------------------------------------------------------------------------------------------------------------------------------------|
| Journal:                        | <i>BMJ Open</i>                                                                                                                                                                                                                                                                                                                                                                                                                                                                                                                                                                                                                                                                                                                                                                                         |
| Manuscript ID                   | bmjopen-2022-069465.R1                                                                                                                                                                                                                                                                                                                                                                                                                                                                                                                                                                                                                                                                                                                                                                                  |
| Article Type:                   | Original research                                                                                                                                                                                                                                                                                                                                                                                                                                                                                                                                                                                                                                                                                                                                                                                       |
| Date Submitted by the Author:   | 27-Dec-2022                                                                                                                                                                                                                                                                                                                                                                                                                                                                                                                                                                                                                                                                                                                                                                                             |
| Complete List of Authors:       | Xu, Yuyuan; Beijing Tiantan Hospital,<br>Chen, Weiqi; Beijing Tiantan Hospital<br>Wang, Mengxing; Beijing Tiantan Hospital<br>PAN, YUESONG; Beijing Tiantan Hospital, China National Clinical<br>Research Center for Neurological Diseases<br>Li, Zixiao; Beijing Tiantan Hospital, Neurology<br>Liu, Liping; Beijing Tiantan Hospital, Neurology; China National Clinical<br>Research Center for Neurological Diseases,<br>Zhao, Xingquan; Beijing Tiantan Hospital, Neurology<br>Wang, Yilong; Beijing Tiantan Hospital, Department of Neurology<br>Li, Hao; Beijing Tiantan Hospital<br>Wang, Yongjun; Beijing Tiantan Hospital, China National Clinical<br>Research Center for Neurological Diseases<br>Meng, Xia; Beijing Tiantan Hospital, Department of Neurology; Capital<br>Medical University |
| <b>Primary Subject Heading</b>: | Medical management                                                                                                                                                                                                                                                                                                                                                                                                                                                                                                                                                                                                                                                                                                                                                                                      |
| Secondary Subject Heading:      | Neurology, Medical management                                                                                                                                                                                                                                                                                                                                                                                                                                                                                                                                                                                                                                                                                                                                                                           |
| Keywords:                       | Neurology < INTERNAL MEDICINE, Lipid disorders < DIABETES & ENDOCRINOLOGY, Stroke medicine < INTERNAL MEDICINE, Stroke < NEUROLOGY                                                                                                                                                                                                                                                                                                                                                                                                                                                                                                                                                                                                                                                                      |
|                                 |                                                                                                                                                                                                                                                                                                                                                                                                                                                                                                                                                                                                                                                                                                                                                                                                         |

SCHOLARONE™  
Manuscripts



I, the Submitting Author has the right to grant and does grant on behalf of all authors of the Work (as defined in the below author licence), an exclusive licence and/or a non-exclusive licence for contributions from authors who are: i) UK Crown employees; ii) where BMJ has agreed a CC-BY licence shall apply, and/or iii) in accordance with the terms applicable for US Federal Government officers or employees acting as part of their official duties; on a worldwide, perpetual, irrevocable, royalty-free basis to BMJ Publishing Group Ltd ("BMJ") its licensees and where the relevant Journal is co-owned by BMJ to the co-owners of the Journal, to publish the Work in this journal and any other BMJ products and to exploit all rights, as set out in our [licence](#).

The Submitting Author accepts and understands that any supply made under these terms is made by BMJ to the Submitting Author unless you are acting as an employee on behalf of your employer or a postgraduate student of an affiliated institution which is paying any applicable article publishing charge ("APC") for Open Access articles. Where the Submitting Author wishes to make the Work available on an Open Access basis (and intends to pay the relevant APC), the terms of reuse of such Open Access shall be governed by a Creative Commons licence – details of these licences and which [Creative Commons](#) licence will apply to this Work are set out in our licence referred to above.

Other than as permitted in any relevant BMJ Author's Self Archiving Policies, I confirm this Work has not been accepted for publication elsewhere, is not being considered for publication elsewhere and does not duplicate material already published. I confirm all authors consent to publication of this Work and authorise the granting of this licence.

1  
2  
3  
4 **Lipid Management in Ischemic Stroke or Transient Ischemic Attack in China:**  
5  
6 **Result from China National Stroke Registry III**  
7  
8  
9

10  
11 Yu-Yuan Xu, MD<sup>a, b</sup>; Wei-Qi Chen, MD<sup>a, b</sup>; Meng-Xing Wang, PhD<sup>b</sup>; Yue-Song  
12 Pan, PhD<sup>b</sup>; Zi-Xiao Li, MD<sup>a, b</sup>; Li-Ping Liu, MD<sup>a, b</sup>; Xing-Quan Zhao, MD<sup>a, b</sup>; Yi-  
13 Long Wang, MD<sup>a, b</sup>; Hao Li, PhD<sup>b</sup>; Yong-Jun Wang, MD<sup>a, b, c, d</sup>; Xia Meng, MD<sup>a, b</sup>;  
14 on behalf of the CNSR-III Investigators  
15  
16  
17  
18  
19  
20  
21  
22  
23

24  
25 <sup>a</sup> Department of Neurology, Beijing Tiantan Hospital, Capital Medical University,  
26 Beijing, China  
27  
28

29  
30 <sup>b</sup> China National Clinical Research Center for Neurological Diseases, Beijing Tiantan  
31 Hospital, Capital Medical University, Beijing, China  
32  
33

34  
35 <sup>c</sup> Advanced Innovation Center for Human Brain Protection, Capital Medical  
36 University, Beijing, China  
37  
38

39  
40 <sup>d</sup> Research Unit of Artificial Intelligence in Cerebrovascular Disease, Chinese  
41 Academy of Medical Sciences, 2019RU018  
42  
43  
44  
45  
46  
47

48 **Running title:** Lipid management in Ischemic Stroke or TIA  
49

50 Correspondence to Dr. Xia Meng: No. 119 South 4th Ring West Road, Fengtai  
51 District, Beijing 100070, China. Email: mengxia45@163.com. Phone: +86 10  
52 59978245. Fax: +86 10 59973383.  
53  
54  
55  
56  
57

58 Number of Tables: 7  
59  
60

1  
2  
3  
4 Number of Figures: 1  
5

6  
7 Word count: 3469  
8  
9

10 **Keywords:** low-density lipoprotein cholesterol, lipid-lowering treatment, ischemic  
11  
12 stroke, second prevention  
13  
14  
15  
16  
17  
18  
19  
20  
21  
22  
23  
24  
25  
26  
27  
28  
29  
30  
31  
32  
33  
34  
35  
36  
37  
38  
39  
40  
41  
42  
43  
44  
45  
46  
47  
48  
49  
50  
51  
52  
53  
54  
55  
56  
57  
58  
59  
60

For peer review only

## Abstract

**Background and purpose:** Dyslipidaemia is a significant risk factor for ischemic stroke and transient ischemic attack (TIA). The aims of the study were to assess the management of low-density lipoprotein cholesterol (LDL-C) and the goal achievement, as well as to investigate the association between baseline LDL-C level, lipid-lowering treatment (LLT), and stroke recurrence in patients with ischemic stroke or TIA.

**Methods:** We derived data from the Third China National Stroke Registry (CNSR-III). The primary outcome was a new stroke, LDL-C goal (LDL-C<1.8mmol/L and LDL-C<1.4mmol/L, respectively) achievement rates, and LLT compliance within 3, 6, and 12 months. The associations among the baseline LDL-C level, LLT at discharge, and outcomes were also assessed.

**Results:** Among the 15,166 patients, over 90% of patients received LLT during hospitalization and 2 weeks after discharge; the LLT compliance was 84.5% at 3 months, 75.6% at 6 months, and 64.8% at 12 months. At 12 months, LDL-C goal achievement rate for 1.8mmol/L and 1.4mmol/L was 35.4% and 17.6%, respectively. LLT at discharge was associated with reduced risk of ischemic stroke recurrence (HR=0.687, 95% CI: 0.480-0.985, p=0.0411) at 3 months. The rate of LDL-C reduction from baseline to 3-month follow-up was not associated with a reduced risk of stroke recurrence or major adverse cardiovascular events (MACE) at 12 months. Patients with baseline LDL-C  $\leq$ 1.4mmol/L had a numerically lower risk of stroke, ischemic stroke and MACE at both 3 months and 12 months.

1  
2  
3  
4 **Conclusions:** The LDL-C goal achievement rate has increased mildly in the stroke  
5  
6 and TIA population in mainland China. Lowered baseline LDL-C level was  
7  
8 significantly associated with a decreased short- and long-term risk of ischemic stroke  
9  
10 among stroke and TIA patients. LDL-C<1.4mmol/L might be a safe standard for this  
11  
12 population.  
13  
14  
15  
16  
17  
18  
19

### 20 **Strengths and limitations of this study**

- 21  
22 1. This hospital-based study analyzed the low-density lipoprotein cholesterol (LDL-C)  
23  
24 levels and lipid-lowering therapy (LLT) in patients with ischemic stroke (IS)/transient  
25  
26 ischemic attack (TIA) in the general population of mainland China.  
27  
28
- 29  
30 2. The study included the largest sample of IS/TIA patients and recorded detailed  
31  
32 prognostic characteristics.  
33  
34
- 35  
36 3. The design of the cohort study did not allow for further detailed analysis of lipid-  
37  
38 lowering medication use, such as dose change and duration.  
39  
40
- 41  
42 4. Some undetected confounding factors, including residual risk, were not able to be  
43  
44 assessed in this study.  
45  
46  
47  
48  
49  
50  
51  
52  
53  
54  
55  
56  
57  
58  
59  
60



## Introduction

Low-density lipoprotein cholesterol (LDL-C) has been well established as an independent risk factor for ischemic stroke<sup>1</sup>. Intensive lipid-lowering treatment (LLT) has been proven to reduce cardiovascular event recurrence in ischemic stroke (IS)/transient ischemic attack (TIA) patients. The Stroke Prevention by Aggressive Reduction in Cholesterol Levels (SPARCL) study<sup>2</sup> showed that intensive atorvastatin treatment for five years reduced the risk of stroke recurrence up to 16% (HR 0.84, 95% CI 0.71-0.99; P<0.03) in IS/TIA. Recently, Treat Stroke to Target (TST) study<sup>3</sup> also demonstrated that IS/TIA patients who had a target LDL-C level of less than 70 mg/dl (1.8mmol/L) had a lower risk of subsequent cardiovascular events than those who had a target range of 90 to 110 mg/dl (HR 0.78, 95% CI 0.61-0.98; P=0.04). Therefore, European Stroke Organisation (ESO) and American Stroke Association (ASA) both updated the IS/TIA second prevention guideline with a recommendation of LDL-C target goal to be less than 70mg/dl (1.8mmol/L)<sup>4,5</sup>.

However, there are still clinical questions not thoroughly investigated. Firstly, SPARCL and TST trials are randomized controlled trials conducted mainly in the Caucasian population<sup>2,6</sup>, whereas studies focusing on the Asian population on lipid management in stroke patients are limited. Since there are more intracranial artery stenosis (ICAS)<sup>7,8</sup> and cerebral small vessel disease (CSVD) patients in Asia<sup>9,10</sup>, especially in east Asia, the applicability of the conclusions of these two trials to Asian people should be discreet. Secondly, there are inconsistencies and conflicts about whether the reduced LDL-C level, especially during the acute or subacute phase,

1  
2  
3  
4 could increase the risk of intracranial hemorrhage (ICH). In the SPARCL study,  
5  
6 subgroup analysis indicated that atorvastatin treatment might increase the risk of ICH,  
7  
8  
9 which led to a big concern for statin usage during the acute phase of IS/TIA <sup>11</sup>. In  
10  
11 contrast, the TST study showed that the incidence of ICH did not differ significantly  
12  
13 between the lower- and higher-target groups <sup>3</sup>. Thirdly, with emerging evidence from  
14  
15 non-statin therapies such as IMPROVE-IT <sup>12</sup>, FOURIER <sup>13</sup>, and ODYSSEY <sup>14</sup>, a lower  
16  
17 LDL-C target of less than 1.4mmol/L or even 1.0mmol/L has been recommended for  
18  
19 adoption as international guidelines. However, the benefits of a lower LDL-C target  
20  
21 lower than 1.8mmol/L have not been investigated.

22  
23  
24  
25  
26  
27 The Third China National Stroke Registry (CNSR-III) is one of the world's most  
28  
29 extensive IS/TIA cohort studies and it includes comprehensive medical histories,  
30  
31 centralized the Trial of Org 10172 in Acute Stroke Treatment (TOAST) classification  
32  
33 judication, and follow-up outcomes. We aimed to collect data from CNSR-III to  
34  
35 investigate the China's current lipid management practices and the associations  
36  
37 between LDL-C level, LLT, and stroke recurrence in ischemic stroke or TIA patients.  
38  
39  
40  
41

## 42 **Methods**

### 43 **Study design and participants**

44  
45  
46  
47  
48  
49  
50 The study was based on the CNSR-III database. The CNSR-III is a nationwide  
51  
52 clinical registry of ischemic stroke or transient ischemic attack (TIA) based on  
53  
54 etiology, imaging, and biological markers in China from August 2015 to March 2018  
55  
56  
57  
58 <sup>15</sup>. 201 participating hospitals were selected in China, and 15,166 patients were  
59  
60

1  
2  
3  
4 eligible and had complete information at baseline. The total 15,166 patients were  
5  
6 included in the analysis.  
7

8  
9 Among all the clinical centers included in CNSR-III, 169 centers voluntarily  
10  
11 participated in the prespecified blood biomarker substudy, with all the patients at  
12  
13 these centers participating in the biomarker substudy. Such patients provided a  
14  
15 separate written informed consent form that included their consent for blood sample  
16  
17 collection and further study of biomarkers.  
18  
19

20  
21 The study protocol of the CNSR-III was approved by the ethics committee at Beijing  
22  
23 Tiantan Hospital (IRB approval number: KY2015-001-01) and all participating  
24  
25 centres. Every participant provided written informed consent before participation.  
26  
27  
28

### 29 30 31 **Data Collection and Management** 32

33  
34 Patient information, including demographics, risk factors, comorbidities, medications,  
35  
36 selected laboratory tests, and hospital-level characteristics, were collected  
37  
38 systematically during hospitalization and at discharge by trained research coordinators  
39  
40 at each participating hospital. National Institutes of Health Stroke Scale (NIHSS)  
41  
42 score at admission, and ischemic stroke recurrence, composite vascular event, and  
43  
44 modified Rankin Scale (mRS) at 3 months and 1 year after stroke onset were also  
45  
46 collected.  
47  
48  
49

50  
51 Venous blood samples were collected from fasting patients within 24 hours from  
52  
53 admission. Serum specimens were extracted, aliquoted, and transported through the  
54  
55 cold chain to the central laboratory in Beijing Tiantan Hospital and stored at -80°C.  
56  
57  
58  
59  
60

1  
2  
3  
4 LDL-C measurements were centrally and blindly assayed by enzymatic method on the  
5  
6 Cobas 8000 analyzer c702 module (Roche Diagnostics, Mannheim, Germany).  
7  
8  
9

### 10 **Follow-Up and Clinical Outcome Evaluations**

11  
12  
13

14 Patients were followed up through face-to-face interviews at 3 months and by  
15  
16 telephone interviews at 6 and 12 months by trained research coordinators who  
17  
18 followed a standardized interview protocol. Information collected at each follow-up  
19  
20 included cardio- and cerebrovascular events, all causes of death, and medications use.  
21  
22 Vascular events were confirmed with the treating hospital, and death was either  
23  
24 confirmed based on a death certificate issued by the attended hospital or the local civil  
25  
26 registry.  
27  
28  
29  
30

31  
32 The primary outcome was a new stroke (defined as a new neurological deficit lasting  
33  
34 more than 24 hours or re-hospitalization with a diagnosis of ischemic stroke,  
35  
36 intracerebral hemorrhage, or subarachnoid hemorrhage), LDL-C goal (LDL-  
37  
38 C<1.4mmol/L, and LDL-C<1.8mmol/L, respectively) achievement rates and LLT  
39  
40 compliance in China within 3, 6, and 12 months. The secondary outcomes included  
41  
42 major adverse cardiovascular events (including stroke, myocardial infarction, or  
43  
44 vascular death) and all caused death at 3 months and 12 months.  
45  
46  
47  
48  
49

50 All reported efficacy and safety outcomes were verified by a central independent  
51  
52 adjudication committee blinded to study treatment assignments and baseline LDL-C  
53  
54 level.  
55  
56  
57  
58  
59  
60

1  
2  
3  
4 Patients were categorized into four groups according to the baseline LDL-C levels and  
5  
6 lipid-lowering treatment during hospitalization and after discharge: LDL-  
7  
8  $C \leq 1.4 \text{ mmol/L}$ ,  $1.4 \text{ mmol/L} < \text{LDL-C} \leq 1.8 \text{ mmol/L}$ ,  $1.8 \text{ mmol/L} < \text{LDL} \leq 2.6 \text{ mmol/L}$ ,  
9  
10  $\text{LDL} > 2.6 \text{ mmol/L}$ .  
11  
12

13  
14 LLT compliance was defined as the continuation of LLT medication from discharge  
15  
16 to 3, 6, or 12 months after the onset of symptoms. Patients assigned to LLT at  
17  
18 discharge but later discontinuing LLT at any follow-up point within 3, 6, or 12  
19  
20 months were considered “non-persistent”. Patients were considered persistent if they  
21  
22 discontinued one medication but replaced it with another statin medication that they  
23  
24 continued taking through 3, 6, or 12 months after enrollment.  
25  
26  
27  
28  
29

### 30 31 **Statistical analysis**

32  
33  
34 Baseline variables were presented as median with interquartile range (IQR) for  
35  
36 continuous variables and percentages for categorical variables.  
37  
38

39  
40 To analyze the association of baseline LDL-C levels and outcomes, we only included  
41  
42 those subjects who provided 3-month or 12-month bio-sample. Univariate and  
43  
44 multivariate Cox proportional hazard regression models were used. The model  
45  
46 included the following covariates: age, sex, education, current smoking, heavy  
47  
48 drinking, medical history, stroke severity on the NIHSS, history of stroke, history of  
49  
50 diabetes, and history of hypertension. Adjusted hazard ratios (HRs) with 95%  
51  
52 confidence intervals (CIs) were calculated. The dose-response-relationship curves  
53  
54  
55  
56  
57  
58 were also presented.  
59  
60

1  
2  
3  
4 To analyze the effect of discharge LLT on outcomes, we excluded subjects who  
5  
6 reached the end point (stroke recurrence or MACE, death, and loss to follow-up)  
7  
8 during hospitalization. We performed a univariate model and multivariate analysis by  
9  
10 adjusting for age, sex, education, current smoking, heavy drinking, medical history,  
11  
12 stroke severity on the NIHSS, history of stroke, history of diabetes, and history of  
13  
14 hypertension.  
15  
16  
17

18  
19 In addition, to analyze the association of 3-month LDL-C change with stroke  
20  
21 recurrence and MACE within 12 months, we excluded subjects who reached the end  
22  
23 point (stroke recurrence or MACE, death, and loss to follow-up) within 3 months.  
24  
25

26  
27 All statistical analyses in the study were performed by SAS 9.4 software. All  
28  
29 statistical analysis adopted a two-sided test which was performed at a 5% significance  
30  
31 level.  
32  
33  
34

### 35 36 **Patient and Public Involvement**

37  
38 This registry study was designed and conducted without patient and public  
39  
40 involvement. Our results will be disseminated to the public through publication in this  
41  
42 journal.  
43  
44  
45

### 46 47 48 **Results**

#### 49 50 51 52 **Characteristics of study participants**

53  
54  
55 From August 2015 to March 2018, a total of 15166 patients with acute stroke and TIA  
56  
57 were recruited to the CNSR-III trial and entered our final analysis. The average age of  
58  
59  
60

patients was  $62.2 \pm 11.3$  years, 31.7% of patients were women, 14,146 (93.3%) had an index event of stroke, and 1020 (6.7%) had a TIA<sup>15</sup>.

### Baseline LDL-C levels

There were 10,738 patients in LDL-C analysis set: 1,407 (13.1%), 1,636 (15.2%), 3,655 (34.0%), and 4,040 (37.6%) patients with the baseline LDL-C  $\leq 1.4$  mmol/L, 1.4–1.8 mmol/L, 1.8–2.6 mmol/L,  $\geq 2.6$  mmol/L, respectively (Table 1).

**Table 1. Baseline Characteristics for the LDL-C analysis set**

| Variables                             | LDL $\leq 1.4$ mmol/L<br>N=1407 | 1.4 <<br>LDL $\leq 1.8$ mmol/L<br>N=1636 | 1.8 <<br>LDL $\leq 2.6$ mmol/L<br>N=3655 | LDL $> 2.6$ mmol/L<br>N=4040 | P<br>Value* |
|---------------------------------------|---------------------------------|------------------------------------------|------------------------------------------|------------------------------|-------------|
| Women, n (%)                          | 378 (26.9)                      | 439 (26.8)                               | 1057 (28.9)                              | 1517 (37.6)                  | <0.001      |
| Mean age, years (SD)                  | 60.8 $\pm$ 11.9                 | 62.4 $\pm$ 11.3                          | 62.2 $\pm$ 11.3                          | 62.8 $\pm$ 11.1              | <0.001      |
| Ethnicity (non-Han), n (%)            | 30 (2.1)                        | 49 (3.0)                                 | 122 (3.3)                                | 104 (2.6)                    | 0.07        |
| Current smoker, n (%)                 | 435 (30.9)                      | 525 (32.1)                               | 1239 (33.9)                              | 1198 (29.7)                  | <0.001      |
| Heavy drinker, n (%)*                 | 185 (13.2)                      | 210 (12.8)                               | 545 (14.9)                               | 589 (14.6)                   | 0.12        |
| Triglycerides (IQR)                   | 1.3 (0.9-1.9)                   | 1.3 (1.0-1.8)                            | 1.3 (1.0-1.8)                            | 1.5 (1.1-2.0)                | <0.001      |
| TC, mmol/L                            | 2.7 (2.4-3.1)                   | 3.2 (3.0-3.5)                            | 3.8 (3.5-4.1)                            | 4.9 (4.5-5.5)                | <0.001      |
| HDL-C, mmol/L                         | 0.8 (0.7-1.0)                   | 0.9 (0.8-1.1)                            | 0.9 (0.8-1.1)                            | 1.0 (0.8-1.2)                | <0.001      |
| LDL-C, mmol/L                         | 1.2 (1.0-1.3)                   | 1.6 (1.5-1.7)                            | 2.2 (2.0-2.4)                            | 3.2 (2.9-3.8)                | <0.001      |
| BMI                                   | 24.4 (22.5-26.4)                | 24.5 (22.7-26.6)                         | 24.4 (22.5-26.4)                         | 24.5 (22.7-26.7)             | 0.06        |
| Systolic pressure, mmHg               | 145.0 (132.5-160.0)             | 146.5 (133.0-161.0)                      | 148.5 (135.0-163.5)                      | 150.0 (136.0-166.5)          | <0.001      |
| Medical history, n (%)                |                                 |                                          |                                          |                              |             |
| Ischemic stroke                       | 369 (26.2)                      | 429 (26.2)                               | 715 (19.6)                               | 748 (18.5)                   | <0.001      |
| TIA                                   | 44 (3.1)                        | 46 (2.8)                                 | 115 (3.6)                                | 102 (2.5)                    | 0.38        |
| Coronary heart diseases               | 147 (10.5)                      | 193 (11.8)                               | 366 (10.0)                               | 449 (11.1)                   | 0.20        |
| Atrial fibrillation                   | 93 (6.6)                        | 124 (7.6)                                | 272 (7.4)                                | 257 (6.4)                    | 0.19        |
| Hypertension                          | 897 (63.8)                      | 1045 (63.9)                              | 2295 (62.8)                              | 2516 (62.3)                  | 0.62        |
| Diabetes mellitus                     | 386 (27.4)                      | 394 (24.1)                               | 824 (22.5)                               | 960 (23.8)                   | 0.004       |
| Hypercholesterolemia                  | 119 (8.5)                       | 120 (7.3)                                | 302 (8.3)                                | 341 (8.4)                    | 0.56        |
| NIHSS at admission, median (IQR)      | 3.0 (1.0-6.0)                   | 3.0 (1.0-6.0)                            | 3.0 (1.0-6.0)                            | 3.0 (1.0-6.0)                | <0.001      |
| NIHSS 0–3                             | 743 (52.8)                      | 914 (55.9)                               | 1974 (54.0)                              | 2073 (51.3)                  | 0.009       |
| NIHSS $\geq 4$                        | 664 (47.2)                      | 722 (44.1)                               | 1681 (46.0)                              | 1967 (48.7)                  |             |
| mRS (IQR)                             | 0 (0-1.0)                       | 0 (0-1.0)                                | 0 (0-1.0)                                | 0 (0-0)                      | <0.001      |
| Stroke subtype, n (%)                 |                                 |                                          |                                          |                              |             |
| LAA                                   | 303 (21.5)                      | 390 (23.8)                               | 933 (25.5)                               | 1092 (27.0)                  | 0.0095      |
| CE                                    | 81 (5.8)                        | 96 (5.9)                                 | 251 (6.9)                                | 256 (6.3)                    |             |
| SAO                                   | 312 (22.2)                      | 359 (21.9)                               | 740 (20.3)                               | 819 (20.3)                   |             |
| Other                                 | 21 (1.5)                        | 16 (1.0)                                 | 38 (1.0)                                 | 47 (1.2)                     |             |
| Unknown                               | 690 (49.0)                      | 775 (47.4)                               | 1693 (46.3)                              | 1826 (45.2)                  |             |
| Prestroke antiplatelet therapy, n (%) | 1357 (97.4)                     | 1569 (97.1)                              | 3504 (96.7)                              | 3894 (97.0)                  | 0.57        |

|                      |             |             |             |             |      |
|----------------------|-------------|-------------|-------------|-------------|------|
| Prestroke LLT, n (%) | 1359 (97.6) | 1558 (96.4) | 3498 (96.5) | 3897 (97.1) | 0.15 |
| Statin, n (%)        | 1355 (97.3) | 1556 (96.3) | 3491 (96.3) | 3887 (96.9) | 0.27 |

TC: total cholesterol. HDL-C: high-density lipoprotein cholesterol. LDL-C: low-density lipoprotein cholesterol. BMI: body mass index. TIA: transient ischemic attack. NIHSS: National Institutes of Health Stroke Scale. mRS: modified Rankin Scale. LAA: large artery atherosclerosis. CE: cardiogenic embolism. SAO: small artery occlusion. LLT: lipid-lowering therapy.

Patients in the lower baseline LDL-C level group ( $\leq 1.4$  mmol/L) were more likely to be younger ( $p < 0.0001$ ) and had a greater prevalence of cardiovascular risk factors (previous stroke, hypertension, hypercholesterolemia, diabetes mellitus, and history of stroke) ( $p < 0.0001$ ) and lower levels of triglycerides, total cholesterol and high-density lipoprotein (HDL) ( $p < 0.0001$ ). About 97% of the patients had a history of antiplatelet and lipid-lowering therapy, and the rates showed no difference among the four baseline LDL-C groups.

### Association between baseline LDL-C levels and outcomes at 3 months and 12 months

There were 656 (6.11%) new stroke occurrences at 3 months and 1037 (9.66%) at 12 months (Table 2).

**Table 2. Association between baseline LDL-C levels and outcomes at 3 months and 12 months**

|                           | Total | Events (n%) | HR (95% CI) Unadjusted | P value | HR (95% CI) Adjusted | P value |
|---------------------------|-------|-------------|------------------------|---------|----------------------|---------|
| <b>3 months</b>           |       |             |                        |         |                      |         |
| <b>Stroke recurrence</b>  |       |             |                        |         |                      |         |
| LDL $\leq 1.4$ mmol/L     | 1407  | 69 (4.9)    | 0.72 (0.55-0.94)       | 0.01    | 0.74 (0.57-0.97)     | 0.03    |
| 1.4<LDL $\leq 1.8$ mmol/L | 1636  | 95 (5.8)    | 0.85 (0.68-1.08)       | 0.18    | 0.89 (0.70-1.12)     | 0.32    |
| 1.8<LDL $\leq 2.6$ mmol/L | 3655  | 219 (6.0)   | 0.88 (0.74-1.05)       | 0.17    | 0.91 (0.76-1.08)     | 0.28    |
| LDL>2.6mmol/L             | 4040  | 273 (6.8)   | Reference              | -       | Reference            | -       |
| <b>Ischemic stroke</b>    |       |             |                        |         |                      |         |
| LDL $\leq 1.4$ mmol/L     | 1407  | 65 (4.6)    | 0.72 (0.55-0.95)       | 0.02    | 0.74 (0.56-0.98)     | 0.03    |
| 1.4<LDL $\leq 1.8$ mmol/L | 1636  | 88 (5.4)    | 0.84 (0.66-1.07)       | 0.16    | 0.87 (0.68-1.11)     | 0.27    |
| 1.8<LDL $\leq 2.6$ mmol/L | 3655  | 201 (5.5)   | 0.86 (0.72-1.04)       | 0.11    | 0.89 (0.74-1.07)     | 0.22    |
| LDL>2.6mmol/L             | 4040  | 257 (6.4)   | Reference              | -       | Reference            | -       |
| <b>Hemorrhagic stroke</b> |       |             |                        |         |                      |         |
| LDL $\leq 1.4$ mmol/L     | 1407  | 4 (0.3)     | 0.52 (0.18-1.51)       | 0.23    | 0.55 (0.19-1.61)     | 0.28    |



|                           |      |            |                  |       |                  |       |
|---------------------------|------|------------|------------------|-------|------------------|-------|
| 1.4<LDL≤1.8mmol/L         | 1636 | 9 (0.6)    | 1.01 (0.46-2.19) | 0.98  | 1.03 (0.47-2.26) | 0.93  |
| 1.8<LDL≤2.6mmol/L         | 3655 | 20 (0.6)   | 1.00 (0.55-1.84) | 0.99  | 0.93 (0.50-1.73) | 0.82  |
| LDL>2.6mmol/L             | 4040 | 22 (0.5)   | Reference        | -     | Reference        | -     |
| <b>MACE</b>               |      |            |                  |       |                  |       |
| LDL≤1.4mmol/L             | 1407 | 71 (5.1)   | 0.72 (0.56-0.94) | 0.01  | 0.75 (0.57-0.97) | 0.03  |
| 1.4<LDL≤1.8mmol/L         | 1636 | 100 (6.1)  | 0.88 (0.70-1.10) | 0.27  | 0.91 (0.72-1.15) | 0.42  |
| 1.8<LDL≤2.6mmol/L         | 3655 | 231 (6.3)  | 0.91 (0.77-1.08) | 0.29  | 0.93 (0.78-1.11) | 0.43  |
| LDL>2.6mmol/L             | 4040 | 279 (6.9)  | Reference        | -     | Reference        | -     |
| <b>12 months</b>          |      |            |                  |       |                  |       |
| <b>Stroke recurrence</b>  |      |            |                  |       |                  |       |
| LDL≤1.4mmol/L             | 1407 | 114 (8.1)  | 0.76 (0.62-0.93) | 0.009 | 0.77 (0.62-0.95) | 0.01  |
| 1.4<LDL≤1.8mmol/L         | 1636 | 158 (9.7)  | 0.91 (0.76-1.08) | 0.30  | 0.92 (0.76-1.10) | 0.36  |
| 1.8<LDL≤2.6mmol/L         | 3655 | 339 (9.7)  | 0.87 (0.76-1.01) | 0.06  | 0.89 (0.77-1.03) | 0.12  |
| LDL>2.6mmol/L             | 4040 | 426 (10.5) | Reference        | -     | Reference        | -     |
| <b>Ischemic stroke</b>    |      |            |                  |       |                  |       |
| LDL≤1.4mmol/L             | 1407 | 102 (7.6)  | 0.72 (0.58-0.90) | 0.004 | 0.73 (0.59-0.91) | 0.005 |
| 1.4<LDL≤1.8mmol/L         | 1636 | 145 (8.9)  | 0.89 (0.73-1.07) | 0.22  | 0.90 (0.74-1.09) | 0.27  |
| 1.8<LDL≤2.6mmol/L         | 3655 | 304 (8.3)  | 0.83 (0.72-0.97) | 0.02  | 0.86 (0.74-1.00) | 0.04  |
| LDL>2.6mmol/L             | 4040 | 400 (9.9)  | Reference        | -     | Reference        | -     |
| <b>Hemorrhagic stroke</b> |      |            |                  |       |                  |       |
| LDL≤1.4mmol/L             | 1407 | 12 (0.9)   | 0.96 (0.50-1.84) | 0.89  | 0.97 (0.50-1.88) | 0.93  |
| 1.4<LDL≤1.8mmol/L         | 1636 | 15 (0.9)   | 1.03 (0.56-1.87) | 0.94  | 1.02 (0.56-1.88) | 0.95  |
| 1.8<LDL≤2.6mmol/L         | 3655 | 37 (1.0)   | 1.13 (0.72-1.80) | 0.59  | 1.10 (0.69-1.75) | 0.69  |
| LDL>2.6mmol/L             | 4040 | 36 (0.9)   | Reference        | -     | Reference        | -     |
| <b>MACE</b>               |      |            |                  |       |                  |       |
| LDL≤1.4mmol/L             | 1407 | 119 (8.5)  | 0.76 (0.62-0.93) | 0.008 | 0.77 (0.62-0.94) | 0.01  |
| 1.4<LDL≤1.8mmol/L         | 1636 | 170 (10.4) | 0.94 (0.79-1.12) | 0.47  | 0.94 (0.79-1.13) | 0.50  |
| 1.8<LDL≤2.6mmol/L         | 3655 | 363 (9.9)  | 0.90 (0.78-1.03) | 0.13  | 0.91 (0.79-1.05) | 0.20  |
| LDL>2.6mmol/L             | 4040 | 444 (11.0) | Reference        | -     | Reference        | -     |

LDL-C: low-density lipoprotein cholesterol. MACE: major adverse cardiovascular events.

Compared with patients with other LDL-C level subgroups, the patients with LDL-C ≤1.4mmol/L had a numerically lower risk of stroke (HR=0.742, 95% CI: 0.568-0.970, p=0.0291), ischaemic stroke (HR=0.741, 95% CI: 0.562-0.976, p=0.0329) and MACE (HR=0.746, 95% CI: 0.573-0.972, p=0.0297) at 3 months. Similar results were found for the outcome of stroke (HR=0.767, 95% CI: 0.622-0.946, p=0.0131), ischaemic stroke (HR=0.731, 95% CI: 0.587-0.911, p=0.0052) and MACE (HR=0.766, 95% CI: 0.624-0.940, p=0.0106) at 12 months after the initial event. Lower baseline LDL-C level was not associated with an increased risk of hemorrhagic stroke at either 3 months or 12 months (**Table 2**). Using a Cox regression model with restricted cubic

splines, a strong association was also found between baseline LDL-C level and risk of stroke, ischemic stroke, hemorrhagic stroke, and MACE (**Figure 1**).

### **Lipid-lowering management, LLT compliance, and association of discharge LLT and outcomes**

LLT management and compliance of the included patients during hospitalization, at discharge, 3 months, 6 months, and 12 months after the initial event were shown in

**Table 3.**

**Table 3. Lipid-lowering Treatment (LLT) and the compliance of patients in**

#### **CNSR-III**

|                   | Hospitalization | Discharge    | 3 months     | 6 months     | 12 months    |
|-------------------|-----------------|--------------|--------------|--------------|--------------|
| Non LLT           | 547 (3.6)       | 1300 (8.6)   | 2590 (17.4)  | 3007 (22.4)  | 3754 (26.0)  |
| LLT               | 14506 (96.4)    | 13831 (91.4) | 12271 (82.6) | 11726 (77.6) | 10682 (74.0) |
| <b>Compliance</b> |                 |              |              |              |              |
| Non-Persistent    | /               | /            | 2147 (15.5)  | 3382 (24.5)  | 4863 (35.2)  |
| Persistent        | /               | /            | 11684 (84.5) | 10449 (75.6) | 8968 (64.8)  |

Over 90% of patients received LLT during hospitalization and for 2 weeks after discharge. The LLT compliance was 84.5% at 3 months, 75.6% at 6 months, and 64.8% at 12 months. The drug regimens of LLT for the patients in CNSR-III at 3 months, 6 months, and 12 months were shown in **Table 4**.

**Table 4. Lipid-lowering Treatment of the included patients in CNSR-III at 3-month, 6-month, 12-month follow-up (n=15166)**

| Treatment    | Patients with statins, N (%) |              |              |              |              |
|--------------|------------------------------|--------------|--------------|--------------|--------------|
|              | Hospitalization              | Discharge    | 3 months     | 6 months     | 12 months    |
| Atorvastatin | 10527 (69.41)                | 9851 (64.95) | 8656 (57.08) | 8228 (54.25) | 7470 (49.25) |
| <40mg        | 7442 (70.71)                 | 8770 (89.03) | 8284 (95.7)  | 7963 (96.78) | 7269 (97.35) |
| ≥40mg        | 3083 (29.29)                 | 1081 (10.97) | 372 (4.3)    | 265 (3.22)   | 198 (2.65)   |
| Rosuvastatin | 3546 (23.38)                 | 3395 (22.39) | 2903 (19.14) | 2779 (18.32) | 2489 (16.41) |
| <20mg        | 2876 (81.15)                 | 2983 (87.86) | 2650 (91.38) | 2536 (91.29) | 2313 (92.93) |
| ≥20mg        | 668 (18.85)                  | 412 (12.14)  | 250 (8.62)   | 242 (8.71)   | 176 (7.07)   |
| Simvastatin  | 272 (1.79)                   | 239 (1.58)   | 390 (2.57)   | 411 (2.71)   | 444 (2.93)   |
| Pravastatin  | 166 (1.09)                   | 165 (1.09)   | 137 (0.9)    | 128 (0.84)   | 100 (0.66)   |

|             |           |           |           |           |           |
|-------------|-----------|-----------|-----------|-----------|-----------|
| lovastatin  | 25 (0.16) | 24 (0.16) | 33 (0.22) | 33 (0.22) | 30 (0.2)  |
| Fluvastatin | 54 (0.36) | 53 (0.35) | 52 (0.34) | 43 (0.28) | 47 (0.31) |
| Pravastatin | 61 (0.40) | 78 (0.51) | 70 (0.46) | 64 (0.42) | 61 (0.4)  |

Compared with the non-discharge LLT group, LLT at discharge was associated with reduced risk of ischemic stroke (HR=0.65, 95% CI: 0.45-0.94, p=0.02) and stroke recurrence (HR=0.69, 95% CI: 0.48-0.99, p=0.04) at 3 months (Table 5).

**Table 5. The association of Discharge Lipid Lowering Therapy (LLT) and outcomes**

|                           | Total | Events, (n%) | HR (95% CI) Unadjusted | P value | HR (95% CI) Adjusted | P value |
|---------------------------|-------|--------------|------------------------|---------|----------------------|---------|
| <b>3 months</b>           |       |              |                        |         |                      |         |
| <b>Stroke recurrence</b>  |       |              |                        |         |                      |         |
| Discharge LLT             | 13248 | 269 (2.0%)   | 0.68(0.48-0.96)        | 0.03    | 0.69(0.48-0.99)      | 0.04    |
| Non discharge LLT         | 1181  | 35 (3.0%)    | Reference              |         | Reference            |         |
| <b>Ischemic stroke</b>    |       |              |                        |         |                      |         |
| Discharge LLT             | 13263 | 245 (1.9%)   | 0.68(0.47-0.98)        | 0.04    | 0.65(0.45-0.94)      | 0.02    |
| Non discharge LLT         | 1188  | 32 (2.7%)    | Reference              |         | Reference            |         |
| <b>Hemorrhagic stroke</b> |       |              |                        |         |                      |         |
| Discharge LLT             | 13740 | 31 (0.2%)    | 0.71(0.25-2.01)        | 0.52    | 1.19(0.36-3.98)      | 0.78    |
| Non discharge LLT         | 1266  | 4 (0.3%)     | Reference              |         | Reference            |         |
| <b>MACE</b>               |       |              |                        |         |                      |         |
| Discharge LLT             | 13248 | 299 (2.3%)   | 0.71(0.51-1.003)       | 0.052   | 0.74(0.52-1.04)      | 0.08    |
| Non discharge LLT         | 1181  | 37 (3.1%)    | Reference              |         | Reference            |         |
| <b>12 months</b>          |       |              |                        |         |                      |         |
| <b>Stroke recurrence</b>  |       |              |                        |         |                      |         |
| Discharge LLT             | 13248 | 758 (5.7%)   | 0.88(0.7-1.12)         | 0.30    | 0.89(0.7-1.14)       | 0.36    |
| Non discharge LLT         | 1181  | 75 (6.4%)    | Reference              |         | Reference            |         |
| <b>Ischemic stroke</b>    |       |              |                        |         |                      |         |
| Discharge LLT             | 13263 | 683 (5.2%)   | 0.87(0.68-1.11)        | 0.26    | 0.86(0.67-1.10)      | 0.23    |
| Non discharge LLT         | 1188  | 69 (5.8%)    | Reference              |         | Reference            |         |
| <b>Hemorrhagic stroke</b> |       |              |                        |         |                      |         |
| Discharge LLT             | 13740 | 86 (0.6%)    | 0.97(0.47-2.00)        | 0.94    | 1.23(0.56-2.69)      | 0.60    |
| Non discharge LLT         | 1266  | 8 (0.6%)     | Reference              |         | Reference            |         |
| <b>MACE</b>               |       |              |                        |         |                      |         |
| Discharge LLT             | 13248 | 838 (6.3%)   | 0.94(0.75-1.19)        | 0.60    | 0.96(0.76-1.21)      | 0.72    |
| Non discharge LLT         | 1181  | 78(6.6%)     | Reference              |         | Reference            |         |

Patients who reached the end point (stroke recurrence or MACE, death, and loss to follow-up) during hospitalization were excluded.

**LDL-C goal achievement and the association of LDL-C changes (from baseline to 3 months) with outcomes at 12 months**

The overall blood lipid levels at baseline and at 3-month, and 12-month follow-up were shown in **Table 6**. LDL-C goal of 1.8mmol/L was achieved by 28.3% of patients at baseline, 46.7% at 3 months, and 35.4% at 12 months; LDL-C goal of 1.4mmol/L was achieved by 13.1% of patients at baseline, 25.6% at 3 months, and 17.6% at 12 months.

**Table 6. Blood Lipid Level of the included patients at baseline, 3 months and 1 year in CNSR-III**

| Lipids, mmol/L                     | Baseline<br>N=10738 | 3M<br>N=6034    | 12M<br>N=4899   |
|------------------------------------|---------------------|-----------------|-----------------|
| Median triglycerides (IQR), mmol/L | 1.37(1.03-1.87)     | 1.32(0.98-1.81) | 1.46(1.04-2.16) |
| Total cholesterol, mmol/L          | 3.97(3.31-4.72)     | 3.74(3.13-4.54) | 3.92(3.25-4.76) |
| HDL-C, mmol/L                      | 0.93(0.78-1.12)     | 1.02(0.86-1.21) | 0.99(0.79-1.2)  |
| LDL-C, mmol/L                      | 2.31(1.73-2.97)     | 1.87(1.39-2.55) | 2.14(1.57-2.87) |
| LDL <1.4mmol/L, n (%)              | 1407 (13.1)         | 1547 (25.6)     | 862 (17.6)      |
| 1.4 < LDL ≤1.8mmol/L, n (%)        | 1636 (15.2)         | 1272 (21.1)     | 872 (17.8)      |
| 1.8 < LDL ≤2.6mmol/L, n (%)        | 3655 (34.0)         | 1785 (29.6)     | 1533 (31.3)     |
| LDL >2.6mmol/L, n (%)              | 4040 (37.6)         | 1430 (23.7)     | 1632 (33.3)     |

HDL-C: high-density lipoprotein cholesterol. LDL-C: low-density lipoprotein cholesterol.

We did not find any significant association between the LDL-C reduction rate from baseline to 3-month follow-up and the risk of stroke and MACE at 12 months (**Table 7**).

**Table 7. Association of LDL-C changes (from baseline to 3 months) with outcomes at 12 months**

| Percentage of LDL level decrease (compared to baseline) | Total | Events, (n%) | HR (95% CI) unadjusted | P value | HR (95% CI) adjusted | P value |
|---------------------------------------------------------|-------|--------------|------------------------|---------|----------------------|---------|
| <b>12 months</b>                                        |       |              |                        |         |                      |         |
| <b>Stroke recurrence*</b>                               |       |              |                        |         |                      |         |
| <30%, n (%)                                             | 3526  | 137 (3.9)    | 1.48 (0.92-2.39)       | 0.11    | 1.42 (0.87-2.30)     | 0.16    |
| 30-50%, n (%)                                           | 1146  | 45 (3.9)     | 1.50 (0.88-2.56)       | 0.14    | 1.44 (0.84-2.47)     | 0.19    |
| >50%, n (%)                                             | 718   | 19 (2.7)     | Reference              |         | Reference            |         |
| <b>MACE‡</b>                                            |       |              |                        |         |                      |         |

|               |      |           |                  |      |                  |      |
|---------------|------|-----------|------------------|------|------------------|------|
| <30%, n (%)   | 3526 | 149 (4.2) | 1.46 (0.92-2.20) | 0.11 | 1.39 (0.88-2.21) | 0.16 |
| 30-50%, n (%) | 1146 | 47 (4.1)  | 1.41 (0.84-2.36) | 0.19 | 1.36 (0.81-2.28) | 0.24 |
| >50%, n (%)   | 718  | 21 (2.9)  | Reference        |      | Reference        |      |

\* Patients with stroke recurrence, death, and loss to follow-up within 3 months were excluded.

‡ Patients with MACE, death, and loss to follow-up within 3 months were excluded.

## Discussion

This national hospital-based study described the current LDL-C level and LLT of IS/TIA patients in the real world. We described the LLT management and LDL-C goal achievement. We also found that a lowered baseline LDL-C level was associated with a decreased risk of new ischemic stroke and MACE at both 3 months and 12 months after the initial event, without an increased risk of intracranial hemorrhage. In addition, LLT at discharge was associated with a reduced risk of CV events at 3 and 12 months. Given the large sample size of LDL-C levels of IS/TIA patients and comprehensive prognostic characteristics recorded, these findings may have important clinical implications.

Firstly, LDL-C of 1.4 mmol/l might be a reasonable target for the high-risk population. Our study indicated that the LDL  $\leq$  1.4 mmol/L group, with the highest risk factors, had the lowest stroke and MACE rates at 3 and 12 months. The paradox of high risk of stroke with low LDL-C level could be due to the previous intensive LLT and rigid LDL-C control. It is consistent with the previous study that fixed-dose statin regimens are less effective than targeting LDL-C levels of 1.8 or 1.4 mmol/l when pre-treatment LDL-C levels exceed 4 mmol/L<sup>16</sup>; and the target of 1.4 mmol/l recently advocated in particularly high-risk patients is most effective when pre-treatment LDL-C exceeds 3 mmol/l<sup>16</sup>. In addition, 2019 ESC/EAS Guidelines for the management of dyslipidaemias set the most aggressive target of less than 1.4 mmol/L

1  
2  
3  
4 and a reduction of more than 50% in LDL-C <sup>17</sup>.

5  
6 Secondly, our findings suggested that the safety of the LDL-C  $\leq 1.4$  mmol/L at least in  
7  
8 Chinese population, because this level was not associate with an increased risk of  
9  
10 hemorrhagic stroke. Studies of LDL-C and ICH have reported conflicting results. In a  
11  
12 twenty-year epidemiologic study, an excess risk of hemorrhagic stroke was observed  
13  
14 in patients with uncontrolled hypertension and LDL-C  $< 70$  mg/dL (1.8 mmol/L) <sup>18</sup>.  
15  
16 However, in a subgroup analysis of FOURIER trial <sup>19</sup>, among patients with prior  
17  
18 stroke, the risk of hemorrhagic stroke did not increase, even when the median LDL-C  
19  
20 decreased from 2.4 mmol/L at randomization to 0.8 (0.5–1.2) mmol/L at 48 weeks in  
21  
22 the evolocumab group. All stroke and ischemic stroke rates were reduced, and the rate  
23  
24 of hemorrhagic stroke was not significantly changed. Meanwhile, in a systematic  
25  
26 review and meta-analysis, the higher level of LDL-C tended to be associated with a  
27  
28 lower risk of hemorrhagic stroke <sup>20</sup>. Thus, our study indicated the efficacy and safety  
29  
30 of the baseline LDL-C of  $< 1.4$  mmol/L in IS/TIA patients, providing evidence for the  
31  
32 first and second prevention strategies.  
33  
34

35  
36 Thirdly, we described the epidemiological characteristics of Chinese IS/TIA patients  
37  
38 in relation to their LDL-C levels and LLT. Compared to the study conducted in 2013  
39  
40 <sup>21</sup>, our study indicated some progress in blood lipid management in mainland China.  
41  
42 Notably, about 97% of patients had LLT medication history prior to the entry into our  
43  
44 study. Also, compared to the LLT rate of 79.6% in 2013, over 90% of patients in our  
45  
46 cohort received LLT during hospitalization and at discharge; the LLT compliance was  
47  
48 84.5% at 3 months, 75.6% at 6 months, and 64.8% at 12 months. In addition, LDL-C  
49  
50  
51  
52  
53  
54  
55  
56  
57  
58  
59  
60

1  
2  
3  
4 goal achievement for 1.8mmol/L had improved mildly, from 27.4% to 35.4%, and  
5  
6 LDL-C goal achievement for 1.4mmol/L was 17.6% at 12 months. The less than  
7  
8 perfect LLT compliance and LDL-C control rate might be due to statin intolerance in  
9  
10 Asian people, including statin-associated myopathy and hemorrhagic stroke<sup>22,23</sup>. An  
11  
12 earlier meta-analysis indicated that statins increase the risk of hemorrhagic stroke in a  
13  
14 medication dose-dependent and type of index brain vascular injury-dependent  
15  
16 manner, while PCSK9 inhibitors do not increase hemorrhagic stroke risk<sup>24</sup>. Thus,  
17  
18 statins, rather than low-level of LDL-C, might closely relate to the risk of  
19  
20 hemorrhagic stroke. Accordingly, PCSK9 inhibitors might be a more promising lipid-  
21  
22 lowering medication class in patients with an elevated risk of hemorrhagic stroke. In  
23  
24 addition, our analysis revealed a significant association between LLT at discharge and  
25  
26 3-month outcomes, indicating the importance of early LLT implementation.  
27  
28 Fourthly, we did not observe the correlation between the 3-month LDL-C decrease  
29  
30 amplitude and 12-month outcomes. To analyze the association of 3-month LDL-C  
31  
32 change with 12-month outcomes, we excluded subjects who reached the end point  
33  
34 within 3 months, which led to a reduction of our sample size and a loss of a  
35  
36 considerable number of target events, for most stroke recurrences occurred within 3  
37  
38 months<sup>25</sup>. Another critical factor was that we could not adjust some risk factors in the  
39  
40 model, such as IL-6 level or the evidence of relevant intracranial artery stenosis  
41  
42 (ICAS), which were independent risk factors of the residual risk. Although  
43  
44 substantially reduced by secondary prevention treatment, there was still 8.3% residual  
45  
46  
47  
48  
49  
50  
51  
52  
53  
54  
55  
56  
57  
58  
59  
60

1  
2  
3  
4 risk of 12-month recurrent stroke even in patients with persistent adherence to  
5  
6 guideline-based secondary stroke prevention <sup>26</sup>.  
7  
8

9 Our study has several limitations. First, only LLT medication use at the follow-up  
10  
11 time points was recorded, whereas additional details of use during the whole trial,  
12  
13 such as continuous use, intermittent use, and the dose changes were not subjected to  
14  
15 specific analysis. Thus, lipid-lowering agents use at 3 months and 12 months provided  
16  
17 only a partial picture of the course of medication during the trial. Second, statin use  
18  
19 before admission was not recorded in the trial which may confound the results.  
20  
21 Furthermore, details of medication use, such as class, dose, duration, and adherence of  
22  
23 lipid-lowering agents, did not enter the regression model. Third, there could be some  
24  
25 undetected confounding factors in addition to those regarded as the residual risk.  
26  
27 Forth, the use of dual antiplatelet therapy may reduce the risk of a 3-month recurrence  
28  
29 of stroke for more than half of the patients presented with an initial NIHSS score of  
30  
31  $\leq 3$ . Fifth, the trial was conducted exclusively on Chinese patients. The finding in this  
32  
33 study needs to be further validated in studies with a larger sample size and non-Asian  
34  
35 populations.  
36  
37  
38  
39  
40  
41  
42  
43  
44

## 45 **Conclusions**

46  
47 The LDL-C goal achievement has increased mildly in the stroke and TIA population  
48  
49 in mainland China, and its further improvement is still an essential task for secondary  
50  
51 prevention of stroke. The lowered baseline LDL-C level was significantly associated  
52  
53 with a decreased short-and long-term risk of ischemic stroke among stroke and TIA  
54  
55 patients. LDL-C < 1.4 mmol/L could be a safe standard for this population.  
56  
57  
58  
59  
60



### **Ethics Approval Statement**

The study protocol of the CNSR-III was approved by the ethics committee at Beijing Tiantan Hospital (IRB approval number: KY2015-001-01) and all participating centers. Every participant provided written informed consent before participation.

### **Acknowledgement**

We thank Dr. Feng Sheng for his important intellectual contributions to the article.

We thank all participating hospitals, their physicians, and nurses. We appreciate all the patients who took part in the CNSR-III trial.

### **Competing Interests**

The authors have no conflicts of interest to declare.

### **Funding Sources**

This work was supported by the National Key R&D Program of China (No. 2018YFC1312903), National Natural Science Foundation of China (No. 81870905, 82071295, 81801139), and Beijing Hospitals Authority Innovation Studio of Young Staff Funding Support (Code: 202113).

### **Contributorship statement**

Drs. YY Xu and X Meng conceived and designed the study. Drs. X Meng and YJ Wang served as scientific advisors. Drs. X Meng, ZX Li, Hao Li, and YJ Wang critically reviewed the study proposal. Drs. X Meng, XQ Zhao, LP Liu, and YL Wang collected and assembled the data. Drs. MX Wang and YS Pan did statistical analyses. Drs. YY Xu and WQ Chen interpreted the data. Drs. YY Xu drafted the manuscript and did the language editing. Dr. X Meng is responsible for the overall content as

1  
2  
3  
4 guarantor. All the authors approved the final manuscript as submitted and agree to be  
5  
6 accountable for all aspects of the work.  
7  
8

9  
10 **Data sharing statement**  
11

12 The datasets used in this study are not publicly available, but these can be provided on  
13  
14 reasonable request after the approval.  
15  
16  
17  
18  
19  
20  
21  
22  
23  
24  
25  
26  
27  
28  
29  
30  
31  
32  
33  
34  
35  
36  
37  
38  
39  
40  
41  
42  
43  
44  
45  
46  
47  
48  
49  
50  
51  
52  
53  
54  
55  
56  
57  
58  
59  
60

For peer review only

## Reference

1. Wang Y-J, Li Z-X, Gu H-Q, Zhai Y, Jiang Y, Zhao X-Q, Wang Y-L, Yang X, Wang C-J, Meng X, et al. China Stroke Statistics 2019: A Report from the National Center for Healthcare Quality Management in Neurological Diseases, China National Clinical Research Center for Neurological Diseases, the Chinese Stroke Association, National Center for Chronic and Non-communicable Disease Control and Prevention, Chinese Center for Disease Control and Prevention and Institute for Global Neuroscience and Stroke Collaborations. *Stroke Vasc. Neurol.* 2020;5:211–239.
2. Amarenco P, Bogousslavsky J, Callahan A 3rd, Goldstein LB, Hennerici M, Rudolph AE, Sillesen H, Simunovic L, Szarek M, Welch KMA, et al. High-dose Atorvastatin after Stroke or Transient Ischemic Attack. *N. Engl. J. Med.* 2006;355:549–559.
3. Amarenco P, Kim JS, Labreuche J, Charles H, Abtan J, Béjot Y, Cabrejo L, Cha J-K, Ducrocq G, Giroud M, et al. A Comparison of Two LDL Cholesterol Targets after Ischemic Stroke. *N. Engl. J. Med.* 2020;382:9.
4. Klijn CJ, Paciaroni M, Berge E, Korompoki E, Kõrv J, Lal A, Putaala J, Werring DJ. Antithrombotic Treatment for Secondary Prevention of Stroke and Other Thromboembolic Events in Patients with Stroke or Transient Ischemic Attack and Non-valvular Atrial Fibrillation: A European Stroke Organisation guideline. *Eur. stroke J.* 2019;4:198–223.

- 1  
2  
3  
4 5. Kleindorfer DO, Towfighi A, Chaturvedi S, Cockcroft KM, Gutierrez J,  
5  
6 Lombardi-Hill D, Kamel H, Kernan WN, Kittner SJ, Leira EC, et al. 2021  
7  
8  
9 Guideline for the Prevention of Stroke in Patients with Stroke and Transient  
10  
11  
12 Ischemic Attack: A Guideline from the American Heart Association/American  
13  
14 Stroke Association. *Stroke*. 2021;52:e364–e467.  
15  
16
- 17 6. Amarenco P, Kim JS, Labreuche J, Giroud M, Lee BC, Mahagne MH,  
18  
19 Nighoghossian N, Simon T, Steg PG, Touboul PJ, et al. Treat Stroke to Target  
20  
21  
22 Trial Design: First Trial Comparing Two LDL Targets in Patients with  
23  
24  
25 Atherothrombotic Strokes. *Eur. Stroke J*. 2019;4:271–280.  
26  
27
- 28 7. Qureshi AI, Caplan LR. Intracranial Atherosclerosis. *Lancet (London,*  
29  
30  
31  
32  
33 *England)*. 2014;383:984–998.  
34
- 35 8. Wong LKS. Global Burden of Intracranial Atherosclerosis. *Int. J. stroke Off. J.*  
36  
37  
38  
39 *Int. Stroke Soc*. 2006;1:158–159.  
40
- 41 9. Mok V, Srikanth V, Xiong Y, Phan TG, Moran C, Chu S, Zhao Q, Chu WWC,  
42  
43  
44  
45  
46  
47  
48  
49  
50  
51  
52  
53  
54  
55  
56  
57  
58  
59  
60  
60 Wong A, Hong Z, et al. Race-ethnicity and Cerebral Small Vessel Disease--  
Comparison between Chinese and White Populations. *Int. J. stroke Off. J. Int.*  
*Stroke Soc*. 2014;9 Suppl A1:36–42.
10. Wolma J, Nederkoorn PJ, Goossens A, Vergouwen MDI, van Schaik IN,  
Vermeulen M. Ethnicity a Risk factor? The Relation between Ethnicity and  
Large- and Small-vessel Disease in White People, Black People, and Asians  
within a Hospital-based Population. *Eur. J. Neurol*. 2009;16:522–527.

- 1  
2  
3  
4 11. Collins R, Armitage J, Parish S, Sleight P, Peto R. Effects of Cholesterol-  
5  
6 lowering with Simvastatin on Stroke and Other Major Vascular Events in  
7  
8 20536 people with cerebrovascular disease or other high-risk conditions.  
9  
10 *Lancet (London, England)*. 2004;363:757–767.  
11  
12
- 13  
14  
15 12. Oyama K, Giugliano RP, Blazing MA, Park J-G, Tershakovec AM, Sabatine  
16  
17 MS, Cannon CP, Braunwald E. Baseline Low-Density Lipoprotein Cholesterol  
18  
19 and Clinical Outcomes of Combining Ezetimibe with Statin Therapy in  
20  
21 IMPROVE-IT. *J. Am. Coll. Cardiol.* 2021;78:1499–1507.  
22  
23
- 24  
25  
26 13. Sabatine MS, Giugliano RP, Keech AC, Honarpour N, Wiviott SD, Murphy  
27  
28 SA, Kuder JF, Wang H, Liu T, Wasserman SM, et al. Evolocumab and Clinical  
29  
30 Outcomes in Patients with Cardiovascular Disease. *N. Engl. J. Med.*  
31  
32 2017;376:1713–1722.  
33  
34
- 35  
36  
37 14. McKenney JM, Koren MJ, Kereiakes DJ, Hanotin C, Ferrand A-C, Stein EA.  
38  
39 Safety and Efficacy of a Monoclonal Antibody to Proprotein Convertase  
40  
41 Subtilisin/Kexin Type 9 Serine Protease, SAR236553/REGN727, in Patients  
42  
43 with Primary Hypercholesterolemia Receiving Ongoing Stable Atorvastatin  
44  
45 Therapy. *J. Am. Coll. Cardiol.* 2012;59:2344–2353.  
46  
47
- 48  
49  
50 15. Wang Y, Jing J, Meng X, Pan Y, Wang Y, Zhao X, Lin J, Li W, Jiang Y, Li Z,  
51  
52 et al. The Third China National Stroke Registry (CNSR-III) for Patients with  
53  
54 Acute Ischaemic Stroke or Transient Ischaemic Attack: Design, Rationale and  
55  
56 Baseline Patient Characteristics. *Stroke Vasc. Neurol.* 2019;4:158–164.  
57  
58  
59  
60

- 1  
2  
3  
4 16. Soran H, Adam S, Durrington PN. Optimising Treatment of Hyperlipidaemia:  
5  
6 Quantitative Evaluation of UK, USA and European Guidelines Taking Account  
7  
8 of Both LDL Cholesterol Levels and Cardiovascular Disease Risk.  
9  
10  
11 *Atherosclerosis*. 2018;278:135–142.  
12  
13  
14  
15 17. (EAS) TTF for the management of dyslipidaemias of the ESC of C (ESC) and  
16  
17 EAS. 2019 ESC/EAS Guidelines for the Management of Dyslipidaemias: Lipid  
18  
19 Modification to Reduce Cardiovascular Risk. *Atherosclerosis*. 2019;290:140–  
20  
21 205.  
22  
23  
24  
25  
26 18. Zhang X, Liu J, Wang M, Qi Y, Sun J, Liu J, Wang Y, Hao Y, Li Y, Zhou M,  
27  
28 et al. Twenty-year Epidemiologic Study on LDL-C Levels in Relation to the  
29  
30 Risks of Atherosclerotic Event, Hemorrhagic Stroke, and Cancer Death among  
31  
32 Young and Middle-aged Population in China. *J. Clin. Lipidol*. 2018;12:1179-  
33  
34 1189.e4.  
35  
36  
37  
38  
39 19. Giugliano RP, Pedersen TR, Saver JL, Sever PS, Keech AC, Bohula EA,  
40  
41 Murphy SA, Wasserman SM, Honarpour N, Wang H, et al. Stroke Prevention  
42  
43 with the PCSK9 (Proprotein Convertase Subtilisin-Kexin Type 9) Inhibitor  
44  
45 Evolocumab Added to Statin in High-Risk Patients With Stable  
46  
47 Atherosclerosis. *Stroke*. 2020;51:1546–1554.  
48  
49  
50  
51  
52  
53 20. Wang X, Dong Y, Qi X, Huang C, Hou L. Cholesterol Levels and Risk of  
54  
55 Hemorrhagic Stroke: a Systematic Review and Meta-analysis. *Stroke*.  
56  
57 2013;44:1833–1839.  
58  
59  
60

- 1  
2  
3  
4 21. Wang C-J, Wang Y-L, Li Z-X, Wang Y-J. The Management of LDL  
5  
6 Cholesterol and Predictors of Goal Achievement in Stroke Patients in China: A  
7  
8 Cross-Sectional Study. *CNS Neurosci. Ther.* 2016;22:577–583.  
9  
10  
11  
12 22. Tomlinson B, Chan P, Liu Z-M. Statin Responses in Chinese Patients. *J.*  
13  
14 *Atheroscler. Thromb.* 2018;25:199–202.  
15  
16  
17  
18 23. Tomlinson B, Chan P, Liu Z-M. Statin Intolerance-An Asian Perspective. *J.*  
19  
20 *Atheroscler. Thromb.* 2020;27:485–488.  
21  
22  
23  
24 24. Sanz-Cuesta BE, Saver JL. Lipid-Lowering Therapy and Hemorrhagic Stroke  
25  
26 Risk: Comparative Meta-Analysis of Statins and PCSK9 Inhibitors. *Stroke.*  
27  
28 2021;52:3142–3150.  
29  
30  
31  
32 25. Coull AJ, Lovett JK, Rothwell PM. Population Based Study of Early Risk of  
33  
34 Stroke after Transient Ischaemic Attack or Minor Stroke: Implications for  
35  
36 Public Education and Organisation of Services. *BMJ.* 2004;328:326.  
37  
38  
39  
40 26. Pan Y, Li Z, Li J, Jin A, Lin J, Jing J, Li H, Meng X, Wang Y, Wang Y.  
41  
42 Residual Risk and Its Risk Factors for Ischemic Stroke with Adherence to  
43  
44 Guideline-Based Secondary Stroke Prevention. *J. stroke.* 2021;23:51–60.  
45  
46  
47  
48  
49  
50  
51  
52  
53  
54  
55  
56  
57  
58  
59  
60

**Figure 1. Dose-response-relationship curves**

Adjusted odds ratio of events and MACE at 3 months and 12 months according to LDL-C at baseline in patients. (a) stroke at 3 months; (b) ischemic stroke at 3 months; (c) hemorrhagic stroke at 3 months; (d) MACE at 3 months; (e) stroke at 12 months; (f) ischemic stroke at 12 months; (g) hemorrhagic stroke at 12 months; (h) MACE at 12 months. The full line indicates the adjusted hazard ratio and the dashed lines the 95% confidence interval bands. Reference is LDL-C >2.6mmol/L. Data were fitted using a logistic regression model of restricted cubic spline with three knots (the 5th, 50th, 90th percentiles) for LDL-C level, adjusting for potential covariates.





Dose-response-relationship curves

STROBE Statement—Checklist of items that should be included in reports of *cohort studies*

|                              | Item No | Recommendation                                                                                                                                                                                                                                                                                                         | Page No                     |
|------------------------------|---------|------------------------------------------------------------------------------------------------------------------------------------------------------------------------------------------------------------------------------------------------------------------------------------------------------------------------|-----------------------------|
| <b>Title and abstract</b>    | 1       | (a) Indicate the study's design with a commonly used term in the title or the abstract<br>(b) Provide in the abstract an informative and balanced summary of what was done and what was found                                                                                                                          | 1<br>3                      |
| <b>Introduction</b>          |         |                                                                                                                                                                                                                                                                                                                        |                             |
| Background/rationale         | 2       | Explain the scientific background and rationale for the investigation being reported                                                                                                                                                                                                                                   | 5                           |
| Objectives                   | 3       | State specific objectives, including any prespecified hypotheses                                                                                                                                                                                                                                                       | 6                           |
| <b>Methods</b>               |         |                                                                                                                                                                                                                                                                                                                        |                             |
| Study design                 | 4       | Present key elements of study design early in the paper                                                                                                                                                                                                                                                                | 7                           |
| Setting                      | 5       | Describe the setting, locations, and relevant dates, including periods of recruitment, exposure, follow-up, and data collection                                                                                                                                                                                        | 8                           |
| Participants                 | 6       | (a) Give the eligibility criteria, and the sources and methods of selection of participants. Describe methods of follow-up<br>(b) For matched studies, give matching criteria and number of exposed and unexposed                                                                                                      | 7<br>N/A                    |
| Variables                    | 7       | Clearly define all outcomes, exposures, predictors, potential confounders, and effect modifiers. Give diagnostic criteria, if applicable                                                                                                                                                                               | 8                           |
| Data sources/<br>measurement | 8*      | For each variable of interest, give sources of data and details of methods of assessment (measurement). Describe comparability of assessment methods if there is more than one group                                                                                                                                   | 8                           |
| Bias                         | 9       | Describe any efforts to address potential sources of bias                                                                                                                                                                                                                                                              | 9                           |
| Study size                   | 10      | Explain how the study size was arrived at                                                                                                                                                                                                                                                                              | 8                           |
| Quantitative variables       | 11      | Explain how quantitative variables were handled in the analyses. If applicable, describe which groupings were chosen and why                                                                                                                                                                                           | 10                          |
| Statistical methods          | 12      | (a) Describe all statistical methods, including those used to control for confounding<br>(b) Describe any methods used to examine subgroups and interactions<br>(c) Explain how missing data were addressed<br>(d) If applicable, explain how loss to follow-up was addressed<br>(e) Describe any sensitivity analyses | 10<br>10<br>10<br>11<br>N/A |
| <b>Results</b>               |         |                                                                                                                                                                                                                                                                                                                        |                             |
| Participants                 | 13*     | (a) Report numbers of individuals at each stage of study—eg numbers potentially eligible, examined for eligibility, confirmed eligible, included in the study, completing follow-up, and analysed<br>(b) Give reasons for non-participation at each stage<br>(c) Consider use of a flow diagram                        | 11<br>N/A<br>N/A            |
| Descriptive data             | 14*     | (a) Give characteristics of study participants (eg demographic, clinical, social) and information on exposures and potential confounders<br>(b) Indicate number of participants with missing data for each variable of interest<br>(c) Summarise follow-up time (eg, average and total amount)                         | 11<br>N/A<br>12             |
| Outcome data                 | 15*     | Report numbers of outcome events or summary measures over time                                                                                                                                                                                                                                                         | 13                          |

|    |                          |    |                                                                                                                                                                                                              |    |
|----|--------------------------|----|--------------------------------------------------------------------------------------------------------------------------------------------------------------------------------------------------------------|----|
| 1  | Main results             | 16 | (a) Give unadjusted estimates and, if applicable, confounder-adjusted estimates and their precision (eg, 95% confidence interval). Make clear which confounders were adjusted for and why they were included | 13 |
| 2  |                          |    | (b) Report category boundaries when continuous variables were categorized                                                                                                                                    | 13 |
| 3  |                          |    | (c) If relevant, consider translating estimates of relative risk into absolute risk for a meaningful time period                                                                                             | 14 |
| 4  |                          |    |                                                                                                                                                                                                              |    |
| 5  | Other analyses           | 17 | Report other analyses done—eg analyses of subgroups and interactions, and sensitivity analyses                                                                                                               | 14 |
| 6  |                          |    |                                                                                                                                                                                                              |    |
| 7  |                          |    |                                                                                                                                                                                                              |    |
| 8  |                          |    |                                                                                                                                                                                                              |    |
| 9  |                          |    |                                                                                                                                                                                                              |    |
| 10 |                          |    |                                                                                                                                                                                                              |    |
| 11 | <b>Discussion</b>        |    |                                                                                                                                                                                                              |    |
| 12 | Key results              | 18 | Summarise key results with reference to study objectives                                                                                                                                                     | 17 |
| 13 | Limitations              | 19 | Discuss limitations of the study, taking into account sources of potential bias or imprecision. Discuss both direction and magnitude of any potential bias                                                   | 20 |
| 14 |                          |    |                                                                                                                                                                                                              |    |
| 15 | Interpretation           | 20 | Give a cautious overall interpretation of results considering objectives, limitations, multiplicity of analyses, results from similar studies, and other relevant evidence                                   | 18 |
| 16 |                          |    |                                                                                                                                                                                                              |    |
| 17 | Generalisability         | 21 | Discuss the generalisability (external validity) of the study results                                                                                                                                        | 18 |
| 18 |                          |    |                                                                                                                                                                                                              |    |
| 19 |                          |    |                                                                                                                                                                                                              |    |
| 20 |                          |    |                                                                                                                                                                                                              |    |
| 21 | <b>Other information</b> |    |                                                                                                                                                                                                              |    |
| 22 | Funding                  | 22 | Give the source of funding and the role of the funders for the present study and, if applicable, for the original study on which the present article is based                                                | 21 |
| 23 |                          |    |                                                                                                                                                                                                              |    |
| 24 |                          |    |                                                                                                                                                                                                              |    |

\*Give information separately for exposed and unexposed groups.

**Note:** An Explanation and Elaboration article discusses each checklist item and gives methodological background and published examples of transparent reporting. The STROBE checklist is best used in conjunction with this article (freely available on the Web sites of PLoS Medicine at <http://www.plosmedicine.org/>, Annals of Internal Medicine at <http://www.annals.org/>, and Epidemiology at <http://www.epidem.com/>). Information on the STROBE Initiative is available at <http://www.strobe-statement.org>.

# BMJ Open

## Lipid Management in Ischemic Stroke or Transient Ischemic Attack in China: Result from China National Stroke Registry III

|                                 |                                                                                                                                                                                                                                                                                                                                                                                                                                                                                                                                                                                                                                                                                                                                                                                                         |
|---------------------------------|---------------------------------------------------------------------------------------------------------------------------------------------------------------------------------------------------------------------------------------------------------------------------------------------------------------------------------------------------------------------------------------------------------------------------------------------------------------------------------------------------------------------------------------------------------------------------------------------------------------------------------------------------------------------------------------------------------------------------------------------------------------------------------------------------------|
| Journal:                        | <i>BMJ Open</i>                                                                                                                                                                                                                                                                                                                                                                                                                                                                                                                                                                                                                                                                                                                                                                                         |
| Manuscript ID                   | bmjopen-2022-069465.R2                                                                                                                                                                                                                                                                                                                                                                                                                                                                                                                                                                                                                                                                                                                                                                                  |
| Article Type:                   | Original research                                                                                                                                                                                                                                                                                                                                                                                                                                                                                                                                                                                                                                                                                                                                                                                       |
| Date Submitted by the Author:   | 16-Jan-2023                                                                                                                                                                                                                                                                                                                                                                                                                                                                                                                                                                                                                                                                                                                                                                                             |
| Complete List of Authors:       | Xu, Yuyuan; Beijing Tiantan Hospital,<br>Chen, Weiqi; Beijing Tiantan Hospital<br>Wang, Mengxing; Beijing Tiantan Hospital<br>PAN, YUESONG; Beijing Tiantan Hospital, China National Clinical<br>Research Center for Neurological Diseases<br>Li, Zixiao; Beijing Tiantan Hospital, Neurology<br>Liu, Liping; Beijing Tiantan Hospital, Neurology; China National Clinical<br>Research Center for Neurological Diseases,<br>Zhao, Xingquan; Beijing Tiantan Hospital, Neurology<br>Wang, Yilong; Beijing Tiantan Hospital, Department of Neurology<br>Li, Hao; Beijing Tiantan Hospital<br>Wang, Yongjun; Beijing Tiantan Hospital, China National Clinical<br>Research Center for Neurological Diseases<br>Meng, Xia; Beijing Tiantan Hospital, Department of Neurology; Capital<br>Medical University |
| <b>Primary Subject Heading</b>: | Medical management                                                                                                                                                                                                                                                                                                                                                                                                                                                                                                                                                                                                                                                                                                                                                                                      |
| Secondary Subject Heading:      | Neurology, Medical management                                                                                                                                                                                                                                                                                                                                                                                                                                                                                                                                                                                                                                                                                                                                                                           |
| Keywords:                       | Neurology < INTERNAL MEDICINE, Lipid disorders < DIABETES & ENDOCRINOLOGY, Stroke medicine < INTERNAL MEDICINE, Stroke < NEUROLOGY                                                                                                                                                                                                                                                                                                                                                                                                                                                                                                                                                                                                                                                                      |
|                                 |                                                                                                                                                                                                                                                                                                                                                                                                                                                                                                                                                                                                                                                                                                                                                                                                         |

SCHOLARONE™  
Manuscripts



I, the Submitting Author has the right to grant and does grant on behalf of all authors of the Work (as defined in the below author licence), an exclusive licence and/or a non-exclusive licence for contributions from authors who are: i) UK Crown employees; ii) where BMJ has agreed a CC-BY licence shall apply, and/or iii) in accordance with the terms applicable for US Federal Government officers or employees acting as part of their official duties; on a worldwide, perpetual, irrevocable, royalty-free basis to BMJ Publishing Group Ltd ("BMJ") its licensees and where the relevant Journal is co-owned by BMJ to the co-owners of the Journal, to publish the Work in this journal and any other BMJ products and to exploit all rights, as set out in our [licence](#).

The Submitting Author accepts and understands that any supply made under these terms is made by BMJ to the Submitting Author unless you are acting as an employee on behalf of your employer or a postgraduate student of an affiliated institution which is paying any applicable article publishing charge ("APC") for Open Access articles. Where the Submitting Author wishes to make the Work available on an Open Access basis (and intends to pay the relevant APC), the terms of reuse of such Open Access shall be governed by a Creative Commons licence – details of these licences and which [Creative Commons](#) licence will apply to this Work are set out in our licence referred to above.

Other than as permitted in any relevant BMJ Author's Self Archiving Policies, I confirm this Work has not been accepted for publication elsewhere, is not being considered for publication elsewhere and does not duplicate material already published. I confirm all authors consent to publication of this Work and authorise the granting of this licence.

1  
2  
3  
4 **Lipid Management in Ischemic Stroke or Transient Ischemic Attack in China:**  
5  
6  
7 **Result from China National Stroke Registry III**  
8  
9

10  
11 Yu-Yuan Xu, MD<sup>a, b</sup>; Wei-Qi Chen, MD<sup>a, b</sup>; Meng-Xing Wang, PhD<sup>b</sup>; Yue-Song  
12  
13 Pan, PhD<sup>b</sup>; Zi-Xiao Li, MD<sup>a, b</sup>; Li-Ping Liu, MD<sup>a, b</sup>; Xing-Quan Zhao, MD<sup>a, b</sup>; Yi-  
14  
15 Long Wang, MD<sup>a, b</sup>; Hao Li, PhD<sup>b</sup>; Yong-Jun Wang, MD<sup>a, b, c, d</sup>; Xia Meng, MD<sup>a, b</sup>;  
16  
17  
18 on behalf of the CNSR-III Investigators  
19  
20  
21

22  
23  
24  
25 <sup>a</sup> Department of Neurology, Beijing Tiantan Hospital, Capital Medical University,  
26  
27 Beijing, China  
28

29  
30 <sup>b</sup> China National Clinical Research Center for Neurological Diseases, Beijing Tiantan  
31  
32 Hospital, Capital Medical University, Beijing, China  
33

34  
35 <sup>c</sup> Advanced Innovation Center for Human Brain Protection, Capital Medical  
36  
37 University, Beijing, China  
38

39  
40 <sup>d</sup> Research Unit of Artificial Intelligence in Cerebrovascular Disease, Chinese  
41  
42 Academy of Medical Sciences, 2019RU018  
43  
44

45  
46  
47  
48 **Running title:** Lipid management in Ischemic Stroke or TIA  
49

50  
51 Correspondence to Dr. Xia Meng: No. 119 South 4th Ring West Road, Fengtai  
52  
53 District, Beijing 100070, China. Email: mengxia45@163.com. Phone: +86 10  
54  
55 59978245. Fax: +86 10 59973383.  
56

57  
58 Number of Tables: 7  
59  
60

1  
2  
3  
4 Number of Figures: 1  
5

6  
7 Word count: 3551  
8  
9

10 **Keywords:** low-density lipoprotein cholesterol, lipid-lowering treatment, ischemic  
11  
12 stroke, second prevention  
13  
14  
15  
16  
17  
18  
19  
20  
21  
22  
23  
24  
25  
26  
27  
28  
29  
30  
31  
32  
33  
34  
35  
36  
37  
38  
39  
40  
41  
42  
43  
44  
45  
46  
47  
48  
49  
50  
51  
52  
53  
54  
55  
56  
57  
58  
59  
60

For peer review only

## Abstract

**Background and purpose:** Dyslipidaemia is a significant risk factor for ischemic stroke and transient ischemic attack (TIA). The aims of the study were to assess the management of low-density lipoprotein cholesterol (LDL-C) and the goal achievement, as well as to investigate the association between baseline LDL-C level, lipid-lowering treatment (LLT), and stroke recurrence in patients with ischemic stroke or TIA.

**Methods:** We derived data from the Third China National Stroke Registry (CNSR-III). The primary outcome was a new stroke, LDL-C goal (LDL-C<1.8mmol/L and LDL-C<1.4mmol/L, respectively) achievement rates, and LLT compliance within 3, 6, and 12 months. The associations among the baseline LDL-C level, LLT at discharge, and outcomes were also assessed.

**Results:** Among the 15,166 patients, over 90% of patients received LLT during hospitalization and 2 weeks after discharge; the LLT compliance was 84.5% at 3 months, 75.6% at 6 months, and 64.8% at 12 months. At 12 months, LDL-C goal achievement rate for 1.8mmol/L and 1.4mmol/L was 35.4% and 17.6%, respectively. LLT at discharge was associated with reduced risk of ischemic stroke recurrence (HR=0.687, 95% CI: 0.480-0.985, p=0.0411) at 3 months. The rate of LDL-C reduction from baseline to 3-month follow-up was not associated with a reduced risk of stroke recurrence or major adverse cardiovascular events (MACE) at 12 months. Patients with baseline LDL-C  $\leq$ 1.4mmol/L had a numerically lower risk of stroke, ischemic stroke and MACE at both 3 months and 12 months.



1  
2  
3  
4 **Conclusions:** The LDL-C goal achievement rate has increased mildly in the stroke  
5  
6 and TIA population in mainland China. Lowered baseline LDL-C level was  
7  
8 significantly associated with a decreased short- and long-term risk of ischemic stroke  
9  
10 among stroke and TIA patients. LDL-C<1.4mmol/L might be a safe standard for this  
11  
12 population.  
13  
14  
15  
16  
17  
18  
19

### 20 **Strengths and limitations of this study**

- 21  
22 1. This hospital-based study analyzed the low-density lipoprotein cholesterol (LDL-C)  
23  
24 levels and lipid-lowering therapy (LLT) in patients with ischemic stroke (IS)/transient  
25  
26 ischemic attack (TIA) in the general population of mainland China.  
27  
28
- 29  
30 2. The study included the largest sample of IS/TIA patients and recorded detailed  
31  
32 prognostic characteristics.  
33  
34
- 35  
36 3. The design of the cohort study did not allow for further detailed analysis of lipid-  
37  
38 lowering medication use, such as dose change and duration.  
39  
40
- 41  
42 4. Some undetected confounding factors, including residual risk, were not able to be  
43  
44 assessed in this study.  
45  
46  
47  
48  
49  
50  
51  
52  
53  
54  
55  
56  
57  
58  
59  
60

## Introduction

Low-density lipoprotein cholesterol (LDL-C) has been well established as an independent risk factor for ischemic stroke <sup>1</sup>. Intensive lipid-lowering treatment (LLT) has been proven to reduce cardiovascular event recurrence in ischemic stroke (IS)/transient ischemic attack (TIA) patients. The Stroke Prevention by Aggressive Reduction in Cholesterol Levels (SPARCL) study <sup>2</sup> showed that intensive atorvastatin treatment for five years reduced the risk of stroke recurrence up to 16% (HR 0.84, 95% CI 0.71-0.99; P < 0.03) in IS/TIA. Recently, Treat Stroke to Target (TST) study <sup>3</sup> also demonstrated that IS/TIA patients who had a target LDL-C level of less than 70 mg/dl (1.8mmol/L) had a lower risk of subsequent cardiovascular events than those who had a target range of 90 to 110 mg/dl (HR 0.78, 95% CI 0.61-0.98; P=0.04). Therefore, European Stroke Organisation (ESO) and American Stroke Association (ASA) both updated the IS/TIA second prevention guideline with a recommendation of LDL-C target goal to be less than 70mg/dl (1.8mmol/L) <sup>4,5</sup>.

However, there are still clinical questions not thoroughly investigated. Firstly, SPARCL and TST trials are randomized controlled trials conducted mainly in the Caucasian population <sup>2,6</sup>, whereas studies focusing on the Asian population on lipid management in stroke patients are limited. Since there are more intracranial artery stenosis (ICAS) <sup>7,8</sup> and cerebral small vessel disease (CSVD) patients in Asia <sup>9,10</sup>, especially in east Asia, the applicability of the conclusions of these two trials to Asian people should be discreet. Secondly, there are inconsistencies and conflicts about whether the reduced LDL-C level, especially during the acute or subacute phase,

1  
2  
3  
4 could increase the risk of intracranial hemorrhage (ICH). In the SPARCL study,  
5  
6 subgroup analysis indicated that atorvastatin treatment might increase the risk of ICH,  
7  
8  
9 which led to a big concern for statin usage during the acute phase of IS/TIA <sup>11</sup>. In  
10  
11 contrast, the TST study showed that the incidence of ICH did not differ significantly  
12  
13 between the lower- and higher-target groups <sup>3</sup>. Thirdly, with emerging evidence from  
14  
15 non-statin therapies such as IMPROVE-IT <sup>12</sup>, FOURIER <sup>13</sup>, and ODYSSEY <sup>14</sup>, a lower  
16  
17 LDL-C target of less than 1.4mmol/L or even 1.0mmol/L has been recommended for  
18  
19 adoption as international guidelines. However, the benefits of a lower LDL-C target  
20  
21 lower than 1.8mmol/L have not been investigated.  
22  
23  
24  
25

26  
27 The Third China National Stroke Registry (CNSR-III) is one of the world's most  
28  
29 extensive IS/TIA cohort studies and it includes comprehensive medical histories,  
30  
31 centralized the Trial of Org 10172 in Acute Stroke Treatment (TOAST) classification  
32  
33 judication, and follow-up outcomes. We aimed to collect data from CNSR-III to  
34  
35 investigate the China's current lipid management practices and the associations  
36  
37 between LDL-C level, LLT, and stroke recurrence in ischemic stroke or TIA patients.  
38  
39  
40  
41

## 42 **Methods**

### 43 **Study design and participants**

44  
45  
46  
47 This study was based on the CNSR-III database. The CNSR-III is a nationwide  
48  
49 clinical registry of ischemic stroke or transient ischemic attack (TIA) based on  
50  
51 etiology, imaging, and biological markers in China from August 2015 to March 2018  
52  
53  
54  
55  
56  
57  
58  
59  
60  
15. 201 participating hospitals were selected in China, and 15,166 patients were

1  
2  
3  
4 eligible and had complete information at baseline. The total 15,166 patients were  
5  
6 included in the analysis. Among all the clinical centers included in CNSR-III, 169  
7  
8 centers voluntarily participated in the prespecified blood biomarker substudy, with all  
9  
10 the patients at these centers participating in the biomarker substudy. Such patients  
11  
12 provided a separate written informed consent form that included their consent for  
13  
14 blood sample collection and further study of biomarkers. The study protocol of the  
15  
16 CNSR-III was approved by the ethics committee at Beijing Tiantan Hospital (IRB  
17  
18 approval number: KY2015-001-01) and all participating centres. Every participant  
19  
20 provided written informed consent before participation.  
21  
22

23  
24 To eligible for this second analysis research, patients had to meet the following  
25  
26 criteria: (1) age 18 or older; (2) hospitalized with a primary diagnosis of acute  
27  
28 ischemic stroke or transient ischemic attack; (3) direct hospital admission from a  
29  
30 physician's clinic or an emergency department; and (4) informed consent provided by  
31  
32 the patient or legally authorized representative. Patients with intracranial hemorrhage,  
33  
34 subarachnoid hemorrhage, or undetermined stroke were not included in this study.  
35  
36

37  
38 This study was approved by ethics committee at Beijing Tiantan Hospital (KY2019-  
39  
40 109-01).  
41  
42

### 43 44 45 46 47 48 49 **Data Collection and Management**

50  
51  
52 Patient information, including demographics, risk factors, comorbidities, medications,  
53  
54 selected laboratory tests, and hospital-level characteristics, were collected  
55  
56 systematically during hospitalization and at discharge by trained research coordinators  
57  
58  
59  
60

1  
2  
3  
4 at each participating hospital. National Institutes of Health Stroke Scale (NIHSS)  
5  
6 score at admission, and ischemic stroke recurrence, composite vascular event, and  
7  
8 modified Rankin Scale (mRS) at 3 months and 1 year after stroke onset were also  
9  
10 collected.  
11  
12

13  
14 Venous blood samples were collected from fasting patients within 24 hours from  
15  
16 admission. Serum specimens were extracted, aliquoted, and transported through the  
17  
18 cold chain to the central laboratory in Beijing Tiantan Hospital and stored at -80°C.  
19  
20 LDL-C measurements were centrally and blindly assayed by enzymatic method on the  
21  
22 Cobas 8000 analyzer c702 module (Roche Diagnostics, Mannheim, Germany).  
23  
24  
25  
26  
27

### 28 **Follow-Up and Clinical Outcome Evaluations**

29  
30

31  
32 Patients were followed up through face-to-face interviews at 3 months and by  
33  
34 telephone interviews at 6 and 12 months by trained research coordinators who  
35  
36 followed a standardized interview protocol. Information collected at each follow-up  
37  
38 included cardio- and cerebrovascular events, all causes of death, and medications use.  
39  
40 Vascular events were confirmed with the treating hospital, and death was either  
41  
42 confirmed based on a death certificate issued by the attended hospital or the local civil  
43  
44 registry.  
45  
46  
47  
48  
49

50 The primary outcome was a new stroke (defined as a new neurological deficit lasting  
51  
52 more than 24 hours or re-hospitalization with a diagnosis of ischemic stroke,  
53  
54 intracerebral hemorrhage, or subarachnoid hemorrhage), LDL-C goal (LDL-  
55  
56 C<1.4mmol/L, and LDL-C<1.8mmol/L, respectively) achievement rates and LLT  
57  
58  
59  
60

1  
2  
3  
4 compliance in China within 3, 6, and 12 months. The secondary outcomes included  
5  
6 major adverse cardiovascular events (including stroke, myocardial infarction, or  
7  
8 vascular death) and all caused death at 3 months and 12 months.  
9

10  
11 All reported efficacy and safety outcomes were verified by a central independent  
12  
13 adjudication committee blinded to study treatment assignments and baseline LDL-C  
14  
15 level.  
16  
17

18  
19 Patients were categorized into four groups according to the baseline LDL-C levels and  
20  
21 lipid-lowering treatment during hospitalization and after discharge: LDL-  
22  
23  $C \leq 1.4 \text{ mmol/L}$ ,  $1.4 \text{ mmol/L} < \text{LDL-C} \leq 1.8 \text{ mmol/L}$ ,  $1.8 \text{ mmol/L} < \text{LDL} \leq 2.6 \text{ mmol/L}$ ,  
24  
25  $\text{LDL} > 2.6 \text{ mmol/L}$ .  
26  
27

28  
29 LLT compliance was defined as the continuation of LLT medication from discharge  
30  
31 to 3, 6, or 12 months after the onset of symptoms. Patients assigned to LLT at  
32  
33 discharge but later discontinuing LLT at any follow-up point within 3, 6, or 12  
34  
35 months were considered “non-persistent”. Patients were considered persistent if they  
36  
37 discontinued one medication but replaced it with another statin medication that they  
38  
39 continued taking through 3, 6, or 12 months after enrollment.  
40  
41  
42  
43  
44  
45

#### 46 **Statistical analysis**

47  
48  
49 Baseline variables were presented as median with interquartile range (IQR) for  
50  
51 continuous variables and percentages for categorical variables.  
52  
53

54  
55 To analyze the association of baseline LDL-C levels and outcomes, we only included  
56  
57 those subjects who provided 3-month or 12-month bio-sample. Univariate and  
58  
59  
60

1  
2  
3  
4 multivariate Cox proportional hazard regression models were used. The model  
5  
6 included the following covariates: age, sex, education, current smoking, heavy  
7  
8 drinking, medical history, stroke severity on the NIHSS, history of stroke, history of  
9  
10 diabetes, and history of hypertension. Adjusted hazard ratios (HRs) with 95%  
11  
12 confidence intervals (CIs) were calculated. The dose-response-relationship curves  
13  
14 were also presented.  
15  
16  
17

18  
19 To analyze the effect of discharge LLT on outcomes, we excluded subjects who  
20  
21 reached the end point (stroke recurrence or MACE, death, and loss to follow-up)  
22  
23 during hospitalization. We performed a univariate model and multivariate analysis by  
24  
25 adjusting for age, sex, education, current smoking, heavy drinking, medical history,  
26  
27 stroke severity on the NIHSS, history of stroke, history of diabetes, and history of  
28  
29 hypertension.  
30  
31  
32  
33

34  
35 In addition, to analyze the association of 3-month LDL-C change with stroke  
36  
37 recurrence and MACE within 12 months, we excluded subjects who reached the end  
38  
39 point (stroke recurrence or MACE, death, and loss to follow-up) within 3 months.  
40  
41  
42

43 All statistical analyses in the study were performed by SAS 9.4 software. All  
44  
45 statistical analysis adopted a two-sided test which was performed at a 5% significance  
46  
47 level.  
48  
49  
50

## 51 **Patient and Public Involvement**

52  
53  
54  
55  
56  
57  
58  
59  
60

This registry study was designed and conducted without patient and public involvement. Our results will be disseminated to the public through publication in this journal.

## Results

### Characteristics of study participants

From August 2015 to March 2018, a total of 15166 patients with acute stroke and TIA were recruited to the CNSR-III and entered our final analysis. The average age of patients was  $62.2 \pm 11.3$  years, 31.7% of patients were women, 14,146 (93.3%) had an index event of stroke, and 1020 (6.7%) had a TIA<sup>15</sup>.

### Baseline LDL-C levels

There were 10,738 patients in LDL-C analysis set: 1,407 (13.1%), 1,636 (15.2%), 3,655 (34.0%), and 4,040 (37.6%) patients with the baseline LDL-C  $\leq 1.4$  mmol/L, 1.4–1.8 mmol/L, 1.8–2.6 mmol/L,  $\geq 2.6$  mmol/L, respectively (Table 1).

**Table 1. Baseline Characteristics for the LDL-C analysis set**

| Variables                  | LDL $\leq$ 1.4mmol/L<br>N=1407 | 1.4 <<br>LDL $\leq$ 1.8mmol/L<br>N=1636 | 1.8 <<br>LDL $\leq$ 2.6mmol/L<br>N=3655 | LDL $>$ 2.6mmol/L<br>N=4040 | P<br>Value* |
|----------------------------|--------------------------------|-----------------------------------------|-----------------------------------------|-----------------------------|-------------|
| Women, n (%)               | 378 (26.9)                     | 439 (26.8)                              | 1057 (28.9)                             | 1517 (37.6)                 | <0.001      |
| Mean age, years (SD)       | 60.8 $\pm$ 11.9                | 62.4 $\pm$ 11.3                         | 62.2 $\pm$ 11.3                         | 62.8 $\pm$ 11.1             | <0.001      |
| Ethnicity (non-Han), n (%) | 30 (2.1)                       | 49 (3.0)                                | 122 (3.3)                               | 104 (2.6)                   | 0.07        |
| Current smoker, n (%)      | 435 (30.9)                     | 525 (32.1)                              | 1239 (33.9)                             | 1198 (29.7)                 | <0.001      |
| Heavy drinker, n (%)*      | 185 (13.2)                     | 210 (12.8)                              | 545 (14.9)                              | 589 (14.6)                  | 0.12        |
| Triglycerides (IQR)        | 1.3 (0.9-1.9)                  | 1.3 (1.0-1.8)                           | 1.3 (1.0-1.8)                           | 1.5 (1.1-2.0)               | <0.001      |
| TC, mmol/L                 | 2.7 (2.4-3.1)                  | 3.2 (3.0-3.5)                           | 3.8 (3.5-4.1)                           | 4.9 (4.5-5.5)               | <0.001      |
| HDL-C, mmol/L              | 0.8 (0.7-1.0)                  | 0.9 (0.8-1.1)                           | 0.9 (0.8-1.1)                           | 1.0 (0.8-1.2)               | <0.001      |
| LDL-C, mmol/L              | 1.2 (1.0-1.3)                  | 1.6 (1.5-1.7)                           | 2.2 (2.0-2.4)                           | 3.2 (2.9-3.8)               | <0.001      |
| BMI                        | 24.4 (22.5-26.4)               | 24.5 (22.7-26.6)                        | 24.4 (22.5-26.4)                        | 24.5 (22.7-26.7)            | 0.06        |
| Systolic pressure, mmHg    | 145.0 (132.5-160.0)            | 146.5 (133.0-161.0)                     | 148.5 (135.0-163.5)                     | 150.0 (136.0-166.5)         | <0.001      |
| Medical history, n (%)     |                                |                                         |                                         |                             |             |
| Ischemic stroke            | 369 (26.2)                     | 429 (26.2)                              | 715 (19.6)                              | 748 (18.5)                  | <0.001      |



|    |                         |               |               |               |               |        |
|----|-------------------------|---------------|---------------|---------------|---------------|--------|
| 1  |                         |               |               |               |               |        |
| 2  |                         |               |               |               |               |        |
| 3  | TIA                     | 44 (3.1)      | 46 (2.8)      | 115 (3.6)     | 102 (2.5)     | 0.38   |
| 4  | Coronary heart diseases | 147 (10.5)    | 193 (11.8)    | 366 (10.0)    | 449 (11.1)    | 0.20   |
| 5  | Atrial fibrillation     | 93 (6.6)      | 124 (7.6)     | 272 (7.4)     | 257 (6.4)     | 0.19   |
| 6  | Hypertension            | 897 (63.8)    | 1045 (63.9)   | 2295 (62.8)   | 2516 (62.3)   | 0.62   |
| 7  | Diabetes mellitus       | 386 (27.4)    | 394 (24.1)    | 824 (22.5)    | 960 (23.8)    | 0.004  |
| 8  | Hypercholesterolemia    | 119 (8.5)     | 120 (7.3)     | 302 (8.3)     | 341 (8.4)     | 0.56   |
| 9  | NIHSS at admission,     |               |               |               |               |        |
| 10 | median (IQR)            | 3.0 (1.0-6.0) | 3.0 (1.0-6.0) | 3.0 (1.0-6.0) | 3.0 (1.0-6.0) | <0.001 |
| 11 | NIHSS 0–3               | 743 (52.8)    | 914 (55.9)    | 1974 (54.0)   | 2073 (51.3)   | 0.009  |
| 12 | NIHSS≥4                 | 664 (47.2)    | 722 (44.1)    | 1681 (46.0)   | 1967 (48.7)   |        |
| 13 | mRS (IQR)               | 0 (0-1.0)     | 0 (0-1.0)     | 0 (0-1.0)     | 0 (0-0)       | <0.001 |
| 14 | Stroke subtype, n (%)   |               |               |               |               |        |
| 15 | LAA                     | 303 (21.5)    | 390 (23.8)    | 933 (25.5)    | 1092 (27.0)   | 0.0095 |
| 16 | CE                      | 81 (5.8)      | 96 (5.9)      | 251 (6.9)     | 256 (6.3)     |        |
| 17 | SAO                     | 312 (22.2)    | 359 (21.9)    | 740 (20.3)    | 819 (20.3)    |        |
| 18 | Other                   | 21 (1.5)      | 16 (1.0)      | 38 (1.0)      | 47 (1.2)      |        |
| 19 | Unknown                 | 690 (49.0)    | 775 (47.4)    | 1693 (46.3)   | 1826 (45.2)   |        |
| 20 | Prestroke antiplatelet  |               |               |               |               |        |
| 21 | therapy, n (%)          | 1357 (97.4)   | 1569 (97.1)   | 3504 (96.7)   | 3894 (97.0)   | 0.57   |
| 22 | Prestroke LLT, n (%)    | 1359 (97.6)   | 1558 (96.4)   | 3498 (96.5)   | 3897 (97.1)   | 0.15   |
| 23 | Statin, n (%)           | 1355 (97.3)   | 1556 (96.3)   | 3491 (96.3)   | 3887 (96.9)   | 0.27   |

TC: total cholesterol. HDL-C: high-density lipoprotein cholesterol. LDL-C: low-density lipoprotein cholesterol. BMI: body mass index. TIA: transient ischemic attack. NIHSS: National Institutes of Health Stroke Scale. mRS: modified Rankin Scale. LAA: large artery atherosclerosis. CE: cardiogenic embolism. SAO: small artery occlusion. LLT: lipid-lowering therapy.

Patients in the lower baseline LDL-C level group ( $\leq 1.4$  mmol/L) were more likely to be younger ( $p < 0.0001$ ) and had a greater prevalence of cardiovascular risk factors (previous stroke, hypertension, hypercholesterolemia, diabetes mellitus, and history of stroke) ( $p < 0.0001$ ) and lower levels of triglycerides, total cholesterol and high-density lipoprotein (HDL) ( $p < 0.0001$ ). About 97% of the patients had a history of antiplatelet and lipid-lowering therapy, and the rates showed no difference among the four baseline LDL-C groups.

### **Association between baseline LDL-C levels and outcomes at 3 months and 12 months**

There were 656 (6.11%) new stroke occurrences at 3 months and 1037 (9.66%) at 12 months (**Table 2**).

**Table 2. Association between baseline LDL-C levels and outcomes at 3 months and 12 months**

|                           | Total | Events (n%) | HR (95% CI) Unadjusted | <i>P</i> value | HR (95% CI) Adjusted | <i>P</i> value |
|---------------------------|-------|-------------|------------------------|----------------|----------------------|----------------|
| <b>3 months</b>           |       |             |                        |                |                      |                |
| <b>Stroke recurrence</b>  |       |             |                        |                |                      |                |
| LDL≤1.4mmol/L             | 1407  | 69 (4.9)    | 0.72 (0.55-0.94)       | 0.01           | 0.74 (0.57-0.97)     | 0.03           |
| 1.4<LDL≤1.8mmol/L         | 1636  | 95 (5.8)    | 0.85 (0.68-1.08)       | 0.18           | 0.89 (0.70-1.12)     | 0.32           |
| 1.8<LDL≤2.6mmol/L         | 3655  | 219 (6.0)   | 0.88 (0.74-1.05)       | 0.17           | 0.91 (0.76-1.08)     | 0.28           |
| LDL>2.6mmol/L             | 4040  | 273 (6.8)   | Reference              | -              | Reference            | -              |
| <b>Ischemic stroke</b>    |       |             |                        |                |                      |                |
| LDL≤1.4mmol/L             | 1407  | 65 (4.6)    | 0.72 (0.55-0.95)       | 0.02           | 0.74 (0.56-0.98)     | 0.03           |
| 1.4<LDL≤1.8mmol/L         | 1636  | 88 (5.4)    | 0.84 (0.66-1.07)       | 0.16           | 0.87 (0.68-1.11)     | 0.27           |
| 1.8<LDL≤2.6mmol/L         | 3655  | 201 (5.5)   | 0.86 (0.72-1.04)       | 0.11           | 0.89 (0.74-1.07)     | 0.22           |
| LDL>2.6mmol/L             | 4040  | 257 (6.4)   | Reference              | -              | Reference            | -              |
| <b>Hemorrhagic stroke</b> |       |             |                        |                |                      |                |
| LDL≤1.4mmol/L             | 1407  | 4 (0.3)     | 0.52 (0.18-1.51)       | 0.23           | 0.55 (0.19-1.61)     | 0.28           |
| 1.4<LDL≤1.8mmol/L         | 1636  | 9 (0.6)     | 1.01 (0.46-2.19)       | 0.98           | 1.03 (0.47-2.26)     | 0.93           |
| 1.8<LDL≤2.6mmol/L         | 3655  | 20 (0.6)    | 1.00 (0.55-1.84)       | 0.99           | 0.93 (0.50-1.73)     | 0.82           |
| LDL>2.6mmol/L             | 4040  | 22 (0.5)    | Reference              | -              | Reference            | -              |
| <b>MACE</b>               |       |             |                        |                |                      |                |
| LDL≤1.4mmol/L             | 1407  | 71 (5.1)    | 0.72 (0.56-0.94)       | 0.01           | 0.75 (0.57-0.97)     | 0.03           |
| 1.4<LDL≤1.8mmol/L         | 1636  | 100 (6.1)   | 0.88 (0.70-1.10)       | 0.27           | 0.91 (0.72-1.15)     | 0.42           |
| 1.8<LDL≤2.6mmol/L         | 3655  | 231 (6.3)   | 0.91 (0.77-1.08)       | 0.29           | 0.93 (0.78-1.11)     | 0.43           |
| LDL>2.6mmol/L             | 4040  | 279 (6.9)   | Reference              | -              | Reference            | -              |
| <b>12 months</b>          |       |             |                        |                |                      |                |
| <b>Stroke recurrence</b>  |       |             |                        |                |                      |                |
| LDL≤1.4mmol/L             | 1407  | 114 (8.1)   | 0.76 (0.62-0.93)       | 0.009          | 0.77 (0.62-0.95)     | 0.01           |
| 1.4<LDL≤1.8mmol/L         | 1636  | 158 (9.7)   | 0.91 (0.76-1.08)       | 0.30           | 0.92 (0.76-1.10)     | 0.36           |
| 1.8<LDL≤2.6mmol/L         | 3655  | 339 (9.7)   | 0.87 (0.76-1.01)       | 0.06           | 0.89 (0.77-1.03)     | 0.12           |
| LDL>2.6mmol/L             | 4040  | 426 (10.5)  | Reference              | -              | Reference            | -              |
| <b>Ischemic stroke</b>    |       |             |                        |                |                      |                |
| LDL≤1.4mmol/L             | 1407  | 102 (7.6)   | 0.72 (0.58-0.90)       | 0.004          | 0.73 (0.59-0.91)     | 0.005          |
| 1.4<LDL≤1.8mmol/L         | 1636  | 145 (8.9)   | 0.89 (0.73-1.07)       | 0.22           | 0.90 (0.74-1.09)     | 0.27           |
| 1.8<LDL≤2.6mmol/L         | 3655  | 304 (8.3)   | 0.83 (0.72-0.97)       | 0.02           | 0.86 (0.74-1.00)     | 0.04           |
| LDL>2.6mmol/L             | 4040  | 400 (9.9)   | Reference              | -              | Reference            | -              |
| <b>Hemorrhagic stroke</b> |       |             |                        |                |                      |                |
| LDL≤1.4mmol/L             | 1407  | 12 (0.9)    | 0.96 (0.50-1.84)       | 0.89           | 0.97 (0.50-1.88)     | 0.93           |
| 1.4<LDL≤1.8mmol/L         | 1636  | 15 (0.9)    | 1.03 (0.56-1.87)       | 0.94           | 1.02 (0.56-1.88)     | 0.95           |
| 1.8<LDL≤2.6mmol/L         | 3655  | 37 (1.0)    | 1.13 (0.72-1.80)       | 0.59           | 1.10 (0.69-1.75)     | 0.69           |
| LDL>2.6mmol/L             | 4040  | 36 (0.9)    | Reference              | -              | Reference            | -              |
| <b>MACE</b>               |       |             |                        |                |                      |                |
| LDL≤1.4mmol/L             | 1407  | 119 (8.5)   | 0.76 (0.62-0.93)       | 0.008          | 0.77 (0.62-0.94)     | 0.01           |
| 1.4<LDL≤1.8mmol/L         | 1636  | 170 (10.4)  | 0.94 (0.79-1.12)       | 0.47           | 0.94 (0.79-1.13)     | 0.50           |
| 1.8<LDL≤2.6mmol/L         | 3655  | 363 (9.9)   | 0.90 (0.78-1.03)       | 0.13           | 0.91 (0.79-1.05)     | 0.20           |
| LDL>2.6mmol/L             | 4040  | 444 (11.0)  | Reference              | -              | Reference            | -              |

LDL-C: low-density lipoprotein cholesterol. MACE: major adverse cardiovascular events.

1  
2  
3  
4 Compared with patients with other LDL-C level subgroups, the patients with LDL-C  
5  
6  $\leq 1.4$  mmol/L had a numerically lower risk of stroke (HR=0.742, 95% CI: 0.568-0.970,  
7  
8 p=0.0291), ischaemic stroke (HR=0.741, 95% CI: 0.562-0.976, p=0.0329) and MACE  
9  
10 (HR=0.746, 95% CI: 0.573-0.972, p=0.0297) at 3 months. Similar results were found  
11  
12 for the outcome of stroke (HR=0.767, 95% CI: 0.622-0.946, p=0.0131), ischaemic  
13  
14 stroke (HR=0.731, 95% CI: 0.587-0.911, p=0.0052) and MACE (HR=0.766, 95% CI:  
15  
16 0.624-0.940, p=0.0106) at 12 months after the initial event. Lower baseline LDL-C  
17  
18 level was not associated with an increased risk of hemorrhagic stroke at either 3  
19  
20 months or 12 months (**Table 2**). Using a Cox regression model with restricted cubic  
21  
22 splines, a strong association was also found between baseline LDL-C level and risk of  
23  
24 stroke, ischemic stroke, hemorrhagic stroke, and MACE (**Figure 1**).

### 25 26 27 28 29 30 31 32 **Lipid-lowering management, LLT compliance, and association of discharge LLT** 33 34 35 **and outcomes**

36  
37 LLT management and compliance of the included patients during hospitalization, at  
38  
39 discharge, 3 months, 6 months, and 12 months after the initial event were shown in

#### 40 41 42 43 **Table 3.**

44  
45  
46 **Table 3. Lipid-lowering Treatment (LLT) and the compliance of patients in**

#### 47 48 **CNSR-III**

|                   | Hospitalization | Discharge    | 3 months     | 6 months     | 12 months    |
|-------------------|-----------------|--------------|--------------|--------------|--------------|
| Non LLT           | 547 (3.6)       | 1300 (8.6)   | 2590 (17.4)  | 3007 (22.4)  | 3754 (26.0)  |
| LLT               | 14506 (96.4)    | 13831 (91.4) | 12271 (82.6) | 11726 (77.6) | 10682 (74.0) |
| <b>Compliance</b> |                 |              |              |              |              |
| Non-Persistent    | /               | /            | 2147 (15.5)  | 3382 (24.5)  | 4863 (35.2)  |
| Persistent        | /               | /            | 11684 (84.5) | 10449 (75.6) | 8968 (64.8)  |

Over 90% of patients received LLT during hospitalization and for 2 weeks after discharge. The LLT compliance was 84.5% at 3 months, 75.6% at 6 months, and 64.8% at 12 months. The drug regimens of LLT for the patients in CNSR-III at 3 months, 6 months, and 12 months were shown in **Table 4**.

**Table 4. Lipid-lowering Treatment of the included patients in CNSR-III at 3-month, 6-month, 12-month follow-up (n=15166)**

| Treatment    | Patients with statins, N (%) |              |              |              |              |
|--------------|------------------------------|--------------|--------------|--------------|--------------|
|              | Hospitalization              | Discharge    | 3 months     | 6 months     | 12 months    |
| Atorvastatin | 10527 (69.41)                | 9851 (64.95) | 8656 (57.08) | 8228 (54.25) | 7470 (49.25) |
| <40mg        | 7442 (70.71)                 | 8770 (89.03) | 8284 (95.7)  | 7963 (96.78) | 7269 (97.35) |
| ≥40mg        | 3083 (29.29)                 | 1081 (10.97) | 372 (4.3)    | 265 (3.22)   | 198 (2.65)   |
| Rosuvastatin | 3546 (23.38)                 | 3395 (22.39) | 2903 (19.14) | 2779 (18.32) | 2489 (16.41) |
| <20mg        | 2876 (81.15)                 | 2983 (87.86) | 2650 (91.38) | 2536 (91.29) | 2313 (92.93) |
| ≥20mg        | 668 (18.85)                  | 412 (12.14)  | 250 (8.62)   | 242 (8.71)   | 176 (7.07)   |
| Simvastatin  | 272 (1.79)                   | 239 (1.58)   | 390 (2.57)   | 411 (2.71)   | 444 (2.93)   |
| Pravastatin  | 166 (1.09)                   | 165 (1.09)   | 137 (0.9)    | 128 (0.84)   | 100 (0.66)   |
| lovastatin   | 25 (0.16)                    | 24 (0.16)    | 33 (0.22)    | 33 (0.22)    | 30 (0.2)     |
| Fluvastatin  | 54 (0.36)                    | 53 (0.35)    | 52 (0.34)    | 43 (0.28)    | 47 (0.31)    |
| Pravastatin  | 61 (0.40)                    | 78 (0.51)    | 70 (0.46)    | 64 (0.42)    | 61 (0.4)     |

Compared with the non-discharge LLT group, LLT at discharge was associated with reduced risk of ischemic stroke (HR=0.65, 95% CI: 0.45-0.94, p=0.02) and stroke recurrence (HR=0.69, 95% CI: 0.48-0.99, p=0.04) at 3 months (**Table 5**).

**Table 5. The association of Discharge Lipid Lowering Therapy (LLT) and outcomes**

|                           | Total | Events, (n%) | HR (95% CI) Unadjusted | P value | HR (95% CI) Adjusted | P value |
|---------------------------|-------|--------------|------------------------|---------|----------------------|---------|
| <b>3 months</b>           |       |              |                        |         |                      |         |
| <b>Stroke recurrence</b>  |       |              |                        |         |                      |         |
| Discharge LLT             | 13248 | 269 (2.0%)   | 0.68(0.48-0.96)        | 0.03    | 0.69(0.48-0.99)      | 0.04    |
| Non discharge LLT         | 1181  | 35 (3.0%)    | Reference              |         | Reference            |         |
| <b>Ischemic stroke</b>    |       |              |                        |         |                      |         |
| Discharge LLT             | 13263 | 245 (1.9%)   | 0.68(0.47-0.98)        | 0.04    | 0.65(0.45-0.94)      | 0.02    |
| Non discharge LLT         | 1188  | 32 (2.7%)    | Reference              |         | Reference            |         |
| <b>Hemorrhagic stroke</b> |       |              |                        |         |                      |         |
| Discharge LLT             | 13740 | 31 (0.2%)    | 0.71(0.25-2.01)        | 0.52    | 1.19(0.36-3.98)      | 0.78    |
| Non discharge LLT         | 1266  | 4 (0.3%)     | Reference              |         | Reference            |         |

|                           |       |            |                  |       |                 |      |  |
|---------------------------|-------|------------|------------------|-------|-----------------|------|--|
| <b>MACE</b>               |       |            |                  |       |                 |      |  |
| Discharge LLT             | 13248 | 299 (2.3%) | 0.71(0.51-1.003) | 0.052 | 0.74(0.52-1.04) | 0.08 |  |
| Non discharge LLT         | 1181  | 37 (3.1%)  | Reference        |       | Reference       |      |  |
| <b>12 months</b>          |       |            |                  |       |                 |      |  |
| <b>Stroke recurrence</b>  |       |            |                  |       |                 |      |  |
| Discharge LLT             | 13248 | 758 (5.7%) | 0.88(0.7-1.12)   | 0.30  | 0.89(0.7-1.14)  | 0.36 |  |
| Non discharge LLT         | 1181  | 75 (6.4%)  | Reference        |       | Reference       |      |  |
| <b>Ischemic stroke</b>    |       |            |                  |       |                 |      |  |
| Discharge LLT             | 13263 | 683 (5.2%) | 0.87(0.68-1.11)  | 0.26  | 0.86(0.67-1.10) | 0.23 |  |
| Non discharge LLT         | 1188  | 69 (5.8%)  | Reference        |       | Reference       |      |  |
| <b>Hemorrhagic stroke</b> |       |            |                  |       |                 |      |  |
| Discharge LLT             | 13740 | 86 (0.6%)  | 0.97(0.47-2.00)  | 0.94  | 1.23(0.56-2.69) | 0.60 |  |
| Non discharge LLT         | 1266  | 8 (0.6%)   | Reference        |       | Reference       |      |  |
| <b>MACE</b>               |       |            |                  |       |                 |      |  |
| Discharge LLT             | 13248 | 838 (6.3%) | 0.94(0.75-1.19)  | 0.60  | 0.96(0.76-1.21) | 0.72 |  |
| Non discharge LLT         | 1181  | 78(6.6%)   | Reference        |       | Reference       |      |  |

Patients who reached the end point (stroke recurrence or MACE, death, and loss to follow-up) during hospitalization were excluded.

### **LDL-C goal achievement and the association of LDL-C changes (from baseline to 3 months) with outcomes at 12 months**

The overall blood lipid levels at baseline and at 3-month, and 12-month follow-up were shown in **Table 6**. LDL-C goal of 1.8mmol/L was achieved by 28.3% of patients at baseline, 46.7% at 3 months, and 35.4% at 12 months; LDL-C goal of 1.4mmol/L was achieved by 13.1% of patients at baseline, 25.6% at 3 months, and 17.6% at 12 months.

**Table 6. Blood Lipid Level of the included patients at baseline, 3 months and 1 year in CNSR-III**

| Lipids, mmol/L                     | Baseline<br>N=10738 | 3M<br>N=6034    | 12M<br>N=4899   |
|------------------------------------|---------------------|-----------------|-----------------|
| Median triglycerides (IQR), mmol/L | 1.37(1.03-1.87)     | 1.32(0.98-1.81) | 1.46(1.04-2.16) |
| Total cholesterol, mmol/L          | 3.97(3.31-4.72)     | 3.74(3.13-4.54) | 3.92(3.25-4.76) |
| HDL-C, mmol/L                      | 0.93(0.78-1.12)     | 1.02(0.86-1.21) | 0.99(0.79-1.2)  |
| LDL-C, mmol/L                      | 2.31(1.73-2.97)     | 1.87(1.39-2.55) | 2.14(1.57-2.87) |
| LDL <1.4mmol/L, n (%)              | 1407 (13.1)         | 1547 (25.6)     | 862 (17.6)      |
| 1.4 < LDL ≤1.8mmol/L, n (%)        | 1636 (15.2)         | 1272 (21.1)     | 872 (17.8)      |
| 1.8 < LDL ≤2.6mmol/L, n (%)        | 3655 (34.0)         | 1785 (29.6)     | 1533 (31.3)     |
| LDL >2.6mmol/L, n (%)              | 4040 (37.6)         | 1430 (23.7)     | 1632 (33.3)     |

HDL-C: high-density lipoprotein cholesterol. LDL-C: low-density lipoprotein cholesterol.

We did not find any significant association between the LDL-C reduction rate from baseline to 3-month follow-up and the risk of stroke and MACE at 12 months (Table 7).

**Table 7. Association of LDL-C changes (from baseline to 3 months) with outcomes at 12 months**

| Percentage of LDL level decrease (compared to baseline) | Total | Events, (n%) | HR (95% CI) unadjusted | <i>P</i> value | HR (95% CI) adjusted | <i>P</i> value |
|---------------------------------------------------------|-------|--------------|------------------------|----------------|----------------------|----------------|
| <b>12 months</b>                                        |       |              |                        |                |                      |                |
| <b>Stroke recurrence*</b>                               |       |              |                        |                |                      |                |
| <30%, n (%)                                             | 3526  | 137 (3.9)    | 1.48 (0.92-2.39)       | 0.11           | 1.42 (0.87-2.30)     | 0.16           |
| 30-50%, n (%)                                           | 1146  | 45 (3.9)     | 1.50 (0.88-2.56)       | 0.14           | 1.44 (0.84-2.47)     | 0.19           |
| >50%, n (%)                                             | 718   | 19 (2.7)     | Reference              |                | Reference            |                |
| <b>MACE‡</b>                                            |       |              |                        |                |                      |                |
| <30%, n (%)                                             | 3526  | 149 (4.2)    | 1.46 (0.92-2.20)       | 0.11           | 1.39 (0.88-2.21)     | 0.16           |
| 30-50%, n (%)                                           | 1146  | 47 (4.1)     | 1.41 (0.84-2.36)       | 0.19           | 1.36 (0.81-2.28)     | 0.24           |
| >50%, n (%)                                             | 718   | 21 (2.9)     | Reference              |                | Reference            |                |

\* Patients with stroke recurrence, death, and loss to follow-up within 3 months were excluded.

‡ Patients with MACE, death, and loss to follow-up within 3 months were excluded.

## Discussion

This national hospital-based study described the current LDL-C level and LLT of IS/TIA patients in the real world. We described the LLT management and LDL-C goal achievement. We also found that a lowered baseline LDL-C level was associated with a decreased risk of new ischemic stroke and MACE at both 3 months and 12 months after the initial event, without an increased risk of intracranial hemorrhage. In addition, LLT at discharge was associated with a reduced risk of CV events at 3 and 12 months. Given the large sample size of LDL-C levels of IS/TIA patients and comprehensive prognostic characteristics recorded, these findings may have important clinical implications.

1  
2  
3  
4 Firstly, LDL-C of 1.4 mmol/l might be a reasonable target for the high-risk  
5  
6 population. Our study indicated that the LDL  $\leq$  1.4 mmol/L group, with the highest  
7  
8 risk factors, had the lowest stroke and MACE rates at 3 and 12 months. The paradox  
9  
10 of high risk of stroke with low LDL-C level could be due to the previous intensive  
11  
12 LLT and rigid LDL-C control. It is consistent with the previous study that fixed-dose  
13  
14 statin regimens are less effective than targeting LDL-C levels of 1.8 or 1.4 mmol/l  
15  
16 when pre-treatment LDL-C levels exceed 4 mmol/L<sup>16</sup>; and the target of 1.4 mmol/l  
17  
18 recently advocated in particularly high-risk patients is most effective when pre-  
19  
20 treatment LDL-C exceeds 3 mmol/l<sup>16</sup>. In addition, 2019 ESC/EAS Guidelines for the  
21  
22 management of dyslipidaemias set the most aggressive target of less than 1.4 mmol/L  
23  
24 and a reduction of more than 50% in LDL-C<sup>17</sup>.

25  
26  
27 Secondly, our findings suggested that the safety of the LDL-C  $\leq$  1.4mmol/L at least in  
28  
29 Chinese population, because this level was not associate with an increased risk of  
30  
31 hemorrhagic stroke. Studies of LDL-C and ICH have reported conflicting results. In a  
32  
33 twenty-year epidemiologic study, an excess risk of hemorrhagic stroke was observed  
34  
35 in patients with uncontrolled hypertension and LDL-C <70 mg/dL (1.8mmol/L)<sup>18</sup>.  
36  
37 However, in a subgroup analysis of FOURIER trial<sup>19</sup>, among patients with prior  
38  
39 stroke, the risk of hemorrhagic stroke did not increase, even when the median LDL-C  
40  
41 decreased from 2.4 mmol/L at randomization to 0.8 (0.5–1.2) mmol/L at 48 weeks in  
42  
43 the evolocumab group. All stroke and ischemic stroke rates were reduced, and the rate  
44  
45 of hemorrhagic stroke was not significantly changed. Meanwhile, in a systematic  
46  
47 review and meta-analysis, the higher level of LDL-C tended to be associated with a  
48  
49  
50  
51  
52  
53  
54  
55  
56  
57  
58  
59  
60

1  
2  
3  
4 lower risk of hemorrhagic stroke<sup>20</sup>. Thus, our study indicated the efficacy and safety  
5  
6 of the baseline LDL-C of <1.4 mmol/L in IS/TIA patients, providing evidence for the  
7  
8 first and second prevention strategies.  
9

10  
11 Thirdly, we described the epidemiological characteristics of Chinese IS/TIA patients  
12  
13 in relation to their LDL-C levels and LLT. Compared to the study conducted in 2013  
14  
15  
16  
17<sup>21</sup>, our study indicated some progress in blood lipid management in mainland China.  
18  
19 Notably, about 97% of patients had LLT medication history prior to the entry into our  
20  
21 study. Also, compared to the LLT rate of 79.6% in 2013, over 90% of patients in our  
22  
23 cohort received LLT during hospitalization and at discharge; the LLT compliance was  
24  
25  
26  
27  
28  
29  
30  
31  
32  
33  
34  
35  
36  
37  
38  
39  
40  
41  
42  
43  
44  
45  
46  
47  
48  
49  
50  
51  
52  
53  
54  
55  
56  
57  
58  
59  
60  
61  
62  
63  
64  
65  
66  
67  
68  
69  
70  
71  
72  
73  
74  
75  
76  
77  
78  
79  
80  
81  
82  
83  
84  
85  
86  
87  
88  
89  
90  
91  
92  
93  
94  
95  
96  
97  
98  
99  
100  
101  
102  
103  
104  
105  
106  
107  
108  
109  
110  
111  
112  
113  
114  
115  
116  
117  
118  
119  
120  
121  
122  
123  
124  
125  
126  
127  
128  
129  
130  
131  
132  
133  
134  
135  
136  
137  
138  
139  
140  
141  
142  
143  
144  
145  
146  
147  
148  
149  
150  
151  
152  
153  
154  
155  
156  
157  
158  
159  
160  
161  
162  
163  
164  
165  
166  
167  
168  
169  
170  
171  
172  
173  
174  
175  
176  
177  
178  
179  
180  
181  
182  
183  
184  
185  
186  
187  
188  
189  
190  
191  
192  
193  
194  
195  
196  
197  
198  
199  
200  
201  
202  
203  
204  
205  
206  
207  
208  
209  
210  
211  
212  
213  
214  
215  
216  
217  
218  
219  
220  
221  
222  
223  
224  
225  
226  
227  
228  
229  
230  
231  
232  
233  
234  
235  
236  
237  
238  
239  
240  
241  
242  
243  
244  
245  
246  
247  
248  
249  
250  
251  
252  
253  
254  
255  
256  
257  
258  
259  
260  
261  
262  
263  
264  
265  
266  
267  
268  
269  
270  
271  
272  
273  
274  
275  
276  
277  
278  
279  
280  
281  
282  
283  
284  
285  
286  
287  
288  
289  
290  
291  
292  
293  
294  
295  
296  
297  
298  
299  
300  
301  
302  
303  
304  
305  
306  
307  
308  
309  
310  
311  
312  
313  
314  
315  
316  
317  
318  
319  
320  
321  
322  
323  
324  
325  
326  
327  
328  
329  
330  
331  
332  
333  
334  
335  
336  
337  
338  
339  
340  
341  
342  
343  
344  
345  
346  
347  
348  
349  
350  
351  
352  
353  
354  
355  
356  
357  
358  
359  
360  
361  
362  
363  
364  
365  
366  
367  
368  
369  
370  
371  
372  
373  
374  
375  
376  
377  
378  
379  
380  
381  
382  
383  
384  
385  
386  
387  
388  
389  
390  
391  
392  
393  
394  
395  
396  
397  
398  
399  
400  
401  
402  
403  
404  
405  
406  
407  
408  
409  
410  
411  
412  
413  
414  
415  
416  
417  
418  
419  
420  
421  
422  
423  
424  
425  
426  
427  
428  
429  
430  
431  
432  
433  
434  
435  
436  
437  
438  
439  
440  
441  
442  
443  
444  
445  
446  
447  
448  
449  
450  
451  
452  
453  
454  
455  
456  
457  
458  
459  
460  
461  
462  
463  
464  
465  
466  
467  
468  
469  
470  
471  
472  
473  
474  
475  
476  
477  
478  
479  
480  
481  
482  
483  
484  
485  
486  
487  
488  
489  
490  
491  
492  
493  
494  
495  
496  
497  
498  
499  
500  
501  
502  
503  
504  
505  
506  
507  
508  
509  
510  
511  
512  
513  
514  
515  
516  
517  
518  
519  
520  
521  
522  
523  
524  
525  
526  
527  
528  
529  
530  
531  
532  
533  
534  
535  
536  
537  
538  
539  
540  
541  
542  
543  
544  
545  
546  
547  
548  
549  
550  
551  
552  
553  
554  
555  
556  
557  
558  
559  
560  
561  
562  
563  
564  
565  
566  
567  
568  
569  
570  
571  
572  
573  
574  
575  
576  
577  
578  
579  
580  
581  
582  
583  
584  
585  
586  
587  
588  
589  
590  
591  
592  
593  
594  
595  
596  
597  
598  
599  
600  
601  
602  
603  
604  
605  
606  
607  
608  
609  
610  
611  
612  
613  
614  
615  
616  
617  
618  
619  
620  
621  
622  
623  
624  
625  
626  
627  
628  
629  
630  
631  
632  
633  
634  
635  
636  
637  
638  
639  
640  
641  
642  
643  
644  
645  
646  
647  
648  
649  
650  
651  
652  
653  
654  
655  
656  
657  
658  
659  
660  
661  
662  
663  
664  
665  
666  
667  
668  
669  
670  
671  
672  
673  
674  
675  
676  
677  
678  
679  
680  
681  
682  
683  
684  
685  
686  
687  
688  
689  
690  
691  
692  
693  
694  
695  
696  
697  
698  
699  
700  
701  
702  
703  
704  
705  
706  
707  
708  
709  
710  
711  
712  
713  
714  
715  
716  
717  
718  
719  
720  
721  
722  
723  
724  
725  
726  
727  
728  
729  
730  
731  
732  
733  
734  
735  
736  
737  
738  
739  
740  
741  
742  
743  
744  
745  
746  
747  
748  
749  
750  
751  
752  
753  
754  
755  
756  
757  
758  
759  
760  
761  
762  
763  
764  
765  
766  
767  
768  
769  
770  
771  
772  
773  
774  
775  
776  
777  
778  
779  
780  
781  
782  
783  
784  
785  
786  
787  
788  
789  
790  
791  
792  
793  
794  
795  
796  
797  
798  
799  
800  
801  
802  
803  
804  
805  
806  
807  
808  
809  
810  
811  
812  
813  
814  
815  
816  
817  
818  
819  
820  
821  
822  
823  
824  
825  
826  
827  
828  
829  
830  
831  
832  
833  
834  
835  
836  
837  
838  
839  
840  
841  
842  
843  
844  
845  
846  
847  
848  
849  
850  
851  
852  
853  
854  
855  
856  
857  
858  
859  
860  
861  
862  
863  
864  
865  
866  
867  
868  
869  
870  
871  
872  
873  
874  
875  
876  
877  
878  
879  
880  
881  
882  
883  
884  
885  
886  
887  
888  
889  
890  
891  
892  
893  
894  
895  
896  
897  
898  
899  
900  
901  
902  
903  
904  
905  
906  
907  
908  
909  
910  
911  
912  
913  
914  
915  
916  
917  
918  
919  
920  
921  
922  
923  
924  
925  
926  
927  
928  
929  
930  
931  
932  
933  
934  
935  
936  
937  
938  
939  
940  
941  
942  
943  
944  
945  
946  
947  
948  
949  
950  
951  
952  
953  
954  
955  
956  
957  
958  
959  
960  
961  
962  
963  
964  
965  
966  
967  
968  
969  
970  
971  
972  
973  
974  
975  
976  
977  
978  
979  
980  
981  
982  
983  
984  
985  
986  
987  
988  
989  
990  
991  
992  
993  
994  
995  
996  
997  
998  
999  
1000

Thirdly, we described the epidemiological characteristics of Chinese IS/TIA patients in relation to their LDL-C levels and LLT. Compared to the study conducted in 2013<sup>21</sup>, our study indicated some progress in blood lipid management in mainland China. Notably, about 97% of patients had LLT medication history prior to the entry into our study. Also, compared to the LLT rate of 79.6% in 2013, over 90% of patients in our cohort received LLT during hospitalization and at discharge; the LLT compliance was 84.5% at 3 months, 75.6% at 6 months, and 64.8% at 12 months. In addition, LDL-C goal achievement for 1.8mmol/L had improved mildly, from 27.4% to 35.4%, and LDL-C goal achievement for 1.4mmol/L was 17.6% at 12 months. The less than perfect LLT compliance and LDL-C control rate might be due to statin intolerance in Asian people, including statin-associated myopathy and hemorrhagic stroke<sup>22,23</sup>. An earlier meta-analysis indicated that statins increase the risk of hemorrhagic stroke in a medication dose-dependent and type of index brain vascular injury-dependent manner, while PCSK9 inhibitors do not increase hemorrhagic stroke risk<sup>24</sup>. Thus, statins, rather than low-level of LDL-C, might closely relate to the risk of hemorrhagic stroke. Accordingly, PCSK9 inhibitors might be a more promising lipid-lowering medication class in patients with an elevated risk of hemorrhagic stroke. In addition, our analysis revealed a significant association between LLT at discharge and 3-month outcomes, indicating the importance of early LLT implementation.



1  
2  
3  
4 Fourthly, we did not observe the correlation between the 3-month LDL-C decrease  
5  
6 amplitude and 12-month outcomes. To analyze the association of 3-month LDL-C  
7  
8 change with 12-month outcomes, we excluded subjects who reached the end point  
9  
10 within 3 months, which led to a reduction of our sample size and a loss of a  
11  
12 considerable number of target events, for most stroke recurrences occurred within 3  
13  
14 months<sup>25</sup>. Another critical factor was that we could not adjust some risk factors in the  
15  
16 model, such as IL-6 level or the evidence of relevant intracranial artery stenosis  
17  
18 (ICAS), which were independent risk factors of the residual risk. Although  
19  
20 substantially reduced by secondary prevention treatment, there was still 8.3% residual  
21  
22 risk of 12-month recurrent stroke even in patients with persistent adherence to  
23  
24 guideline-based secondary stroke prevention<sup>26</sup>.

25  
26  
27  
28  
29  
30  
31  
32 Our study has several limitations. First, only LLT medication use at the follow-up  
33  
34 time points was recorded, whereas additional details of use during the whole study,  
35  
36 such as continuous use, intermittent use, and the dose changes were not subjected to  
37  
38 specific analysis. Thus, lipid-lowering agents use at 3 months and 12 months provided  
39  
40 only a partial picture of the course of medication during the study. Second, statin use  
41  
42 before admission was not recorded in the study which may confound the results.

43  
44  
45  
46  
47  
48 Furthermore, details of medication use, such as class, dose, duration, and adherence of  
49  
50 lipid-lowering agents, did not enter the regression model. Third, there could be some  
51  
52 undetected confounding factors in addition to those regarded as the residual risk.

53  
54  
55  
56 Forth, the use of dual antiplatelet therapy may reduce the risk of a 3-month recurrence  
57  
58 of stroke for more than half of the patients presented with an initial NIHSS score of  
59  
60

1  
2  
3  
4 ≤3. Fifth, the study was conducted exclusively on Chinese patients. The finding in this  
5  
6 study needs to be further validated in studies with a larger sample size and non-Asian  
7  
8 populations.  
9

## 10 11 **Conclusions**

12  
13  
14 The LDL-C goal achievement has increased mildly in the stroke and TIA population  
15  
16 in mainland China, and its further improvement is still an essential task for secondary  
17  
18 prevention of stroke. The lowered baseline LDL-C level was significantly associated  
19  
20 with a decreased short-and long-term risk of ischemic stroke among stroke and TIA  
21  
22 patients. LDL-C<1.4mmol/L could be a safe standard for this population.  
23  
24  
25

## 26 27 **Ethics Approval Statement**

28  
29  
30 The study protocol of the CNSR-III was approved by the ethics committee at Beijing  
31  
32 Tiantan Hospital (IRB approval number: KY2015-001-01) and all participating  
33  
34 centers. Every participant provided written informed consent before participation.  
35  
36

## 37 38 **Acknowledgement**

39  
40 We thank Dr. Feng Sheng for his important intellectual contributions to the article.  
41  
42 We thank all participating hospitals, their physicians, and nurses. We appreciate all  
43  
44 the patients who took part in the CNSR-III.  
45  
46  
47

## 48 49 **Competing Interests**

50  
51 The authors have no conflicts of interest to declare.  
52

## 53 54 **Funding Sources**

55  
56  
57 This work was supported by the National Key R&D Program of China (No.  
58  
59 2018YFC1312903), National Natural Science Foundation of China (No. 81870905,  
60

1  
2  
3  
4 82071295, 81801139), and Beijing Hospitals Authority Innovation Studio of Young  
5  
6 Staff Funding Support (Code: 202113).  
7  
8

### 9 **Contributorship statement**

10  
11 Drs. YY Xu and X Meng conceived and designed the study. Drs. X Meng and YJ  
12  
13 Wang served as scientific advisors. Drs. X Meng, ZX Li, Hao Li, and YJ Wang  
14  
15 critically reviewed the study proposal. Drs. X Meng, XQ Zhao, LP Liu, and YL Wang  
16  
17 collected and assembled the data. Drs. MX Wang and YS Pan did statistical analyses.  
18  
19 Drs. YY Xu and WQ Chen interpreted the data. Drs. YY Xu drafted the manuscript  
20  
21 and did the language editing. Dr. X Meng is responsible for the overall content as  
22  
23 guarantor. All the authors approved the final manuscript as submitted and agree to be  
24  
25 accountable for all aspects of the work.  
26  
27  
28  
29  
30  
31  
32

### 33 **Data sharing statement**

34  
35 The datasets used in this study are not publicly available, but these can be provided on  
36  
37 reasonable request after the approval.  
38  
39  
40  
41  
42  
43  
44  
45  
46  
47  
48  
49  
50  
51  
52  
53  
54  
55  
56  
57  
58  
59  
60

## Reference

1. Wang Y-J, Li Z-X, Gu H-Q, Zhai Y, Jiang Y, Zhao X-Q, Wang Y-L, Yang X, Wang C-J, Meng X, et al. China Stroke Statistics 2019: A Report from the National Center for Healthcare Quality Management in Neurological Diseases, China National Clinical Research Center for Neurological Diseases, the Chinese Stroke Association, National Center for Chronic and Non-communicable Disease Control and Prevention, Chinese Center for Disease Control and Prevention and Institute for Global Neuroscience and Stroke Collaborations. *Stroke Vasc. Neurol.* 2020;5:211–239.
2. Amarenco P, Bogousslavsky J, Callahan A 3rd, Goldstein LB, Hennerici M, Rudolph AE, Sillesen H, Simunovic L, Szarek M, Welch KMA, et al. High-dose Atorvastatin after Stroke or Transient Ischemic Attack. *N. Engl. J. Med.* 2006;355:549–559.
3. Amarenco P, Kim JS, Labreuche J, Charles H, Abtan J, Béjot Y, Cabrejo L, Cha J-K, Ducrocq G, Giroud M, et al. A Comparison of Two LDL Cholesterol Targets after Ischemic Stroke. *N. Engl. J. Med.* 2020;382:9.
4. Klijn CJ, Paciaroni M, Berge E, Korompoki E, Kõrv J, Lal A, Putaala J, Werring DJ. Antithrombotic Treatment for Secondary Prevention of Stroke and Other Thromboembolic Events in Patients with Stroke or Transient Ischemic Attack and Non-valvular Atrial Fibrillation: A European Stroke Organisation guideline. *Eur. stroke J.* 2019;4:198–223.

- 1  
2  
3  
4 5. Kleindorfer DO, Towfighi A, Chaturvedi S, Cockcroft KM, Gutierrez J,  
5  
6 Lombardi-Hill D, Kamel H, Kernan WN, Kittner SJ, Leira EC, et al. 2021  
7  
8  
9 Guideline for the Prevention of Stroke in Patients with Stroke and Transient  
10  
11  
12 Ischemic Attack: A Guideline from the American Heart Association/American  
13  
14 Stroke Association. *Stroke*. 2021;52:e364–e467.  
15  
16
- 17 6. Amarenco P, Kim JS, Labreuche J, Giroud M, Lee BC, Mahagne MH,  
18  
19 Nighoghossian N, Simon T, Steg PG, Touboul PJ, et al. Treat Stroke to Target  
20  
21  
22 Trial Design: First Trial Comparing Two LDL Targets in Patients with  
23  
24  
25 Atherothrombotic Strokes. *Eur. Stroke J*. 2019;4:271–280.  
26  
27
- 28 7. Qureshi AI, Caplan LR. Intracranial Atherosclerosis. *Lancet (London,*  
29  
30  
31  
32  
33 *England)*. 2014;383:984–998.  
34
- 35 8. Wong LKS. Global Burden of Intracranial Atherosclerosis. *Int. J. stroke Off. J.*  
36  
37  
38  
39 *Int. Stroke Soc*. 2006;1:158–159.  
40
- 41 9. Mok V, Srikanth V, Xiong Y, Phan TG, Moran C, Chu S, Zhao Q, Chu WWC,  
42  
43  
44  
45  
46  
47  
48  
49  
50  
51  
52  
53  
54  
55  
56  
57  
58  
59  
60  
60 Wong A, Hong Z, et al. Race-ethnicity and Cerebral Small Vessel Disease--  
Comparison between Chinese and White Populations. *Int. J. stroke Off. J. Int.*  
*Stroke Soc*. 2014;9 Suppl A1:36–42.
10. Wolma J, Nederkoorn PJ, Goossens A, Vergouwen MDI, van Schaik IN,  
Vermeulen M. Ethnicity a Risk factor? The Relation between Ethnicity and  
Large- and Small-vessel Disease in White People, Black People, and Asians  
within a Hospital-based Population. *Eur. J. Neurol*. 2009;16:522–527.

- 1  
2  
3  
4 11. Collins R, Armitage J, Parish S, Sleight P, Peto R. Effects of Cholesterol-  
5  
6 lowering with Simvastatin on Stroke and Other Major Vascular Events in  
7  
8 20536 people with cerebrovascular disease or other high-risk conditions.  
9  
10  
11  
12 *Lancet (London, England)*. 2004;363:757–767.
- 13  
14  
15 12. Oyama K, Giugliano RP, Blazing MA, Park J-G, Tershakovec AM, Sabatine  
16  
17 MS, Cannon CP, Braunwald E. Baseline Low-Density Lipoprotein Cholesterol  
18  
19 and Clinical Outcomes of Combining Ezetimibe with Statin Therapy in  
20  
21 IMPROVE-IT. *J. Am. Coll. Cardiol.* 2021;78:1499–1507.
- 22  
23  
24  
25  
26 13. Sabatine MS, Giugliano RP, Keech AC, Honarpour N, Wiviott SD, Murphy  
27  
28 SA, Kuder JF, Wang H, Liu T, Wasserman SM, et al. Evolocumab and Clinical  
29  
30 Outcomes in Patients with Cardiovascular Disease. *N. Engl. J. Med.*  
31  
32 2017;376:1713–1722.
- 33  
34  
35  
36  
37 14. McKenney JM, Koren MJ, Kereiakes DJ, Hanotin C, Ferrand A-C, Stein EA.  
38  
39 Safety and Efficacy of a Monoclonal Antibody to Proprotein Convertase  
40  
41 Subtilisin/Kexin Type 9 Serine Protease, SAR236553/REGN727, in Patients  
42  
43 with Primary Hypercholesterolemia Receiving Ongoing Stable Atorvastatin  
44  
45 Therapy. *J. Am. Coll. Cardiol.* 2012;59:2344–2353.
- 46  
47  
48  
49  
50 15. Wang Y, Jing J, Meng X, Pan Y, Wang Y, Zhao X, Lin J, Li W, Jiang Y, Li Z,  
51  
52 et al. The Third China National Stroke Registry (CNSR-III) for Patients with  
53  
54 Acute Ischaemic Stroke or Transient Ischaemic Attack: Design, Rationale and  
55  
56 Baseline Patient Characteristics. *Stroke Vasc. Neurol.* 2019;4:158–164.  
57  
58  
59  
60

- 1  
2  
3  
4 16. Soran H, Adam S, Durrington PN. Optimising Treatment of Hyperlipidaemia:  
5  
6 Quantitative Evaluation of UK, USA and European Guidelines Taking Account  
7  
8 of Both LDL Cholesterol Levels and Cardiovascular Disease Risk.  
9  
10  
11 *Atherosclerosis*. 2018;278:135–142.  
12  
13  
14  
15 17. (EAS) TTF for the management of dyslipidaemias of the ESC of C (ESC) and  
16  
17 EAS. 2019 ESC/EAS Guidelines for the Management of Dyslipidaemias: Lipid  
18  
19 Modification to Reduce Cardiovascular Risk. *Atherosclerosis*. 2019;290:140–  
20  
21 205.  
22  
23  
24  
25  
26 18. Zhang X, Liu J, Wang M, Qi Y, Sun J, Liu J, Wang Y, Hao Y, Li Y, Zhou M,  
27  
28 et al. Twenty-year Epidemiologic Study on LDL-C Levels in Relation to the  
29  
30 Risks of Atherosclerotic Event, Hemorrhagic Stroke, and Cancer Death among  
31  
32 Young and Middle-aged Population in China. *J. Clin. Lipidol*. 2018;12:1179-  
33  
34 1189.e4.  
35  
36  
37  
38  
39 19. Giugliano RP, Pedersen TR, Saver JL, Sever PS, Keech AC, Bohula EA,  
40  
41 Murphy SA, Wasserman SM, Honarpour N, Wang H, et al. Stroke Prevention  
42  
43 with the PCSK9 (Proprotein Convertase Subtilisin-Kexin Type 9) Inhibitor  
44  
45 Evolocumab Added to Statin in High-Risk Patients With Stable  
46  
47 Atherosclerosis. *Stroke*. 2020;51:1546–1554.  
48  
49  
50  
51  
52  
53 20. Wang X, Dong Y, Qi X, Huang C, Hou L. Cholesterol Levels and Risk of  
54  
55 Hemorrhagic Stroke: a Systematic Review and Meta-analysis. *Stroke*.  
56  
57 2013;44:1833–1839.  
58  
59  
60

- 1  
2  
3  
4 21. Wang C-J, Wang Y-L, Li Z-X, Wang Y-J. The Management of LDL  
5  
6 Cholesterol and Predictors of Goal Achievement in Stroke Patients in China: A  
7  
8 Cross-Sectional Study. *CNS Neurosci. Ther.* 2016;22:577–583.  
9  
10  
11  
12 22. Tomlinson B, Chan P, Liu Z-M. Statin Responses in Chinese Patients. *J.*  
13  
14 *Atheroscler. Thromb.* 2018;25:199–202.  
15  
16  
17 23. Tomlinson B, Chan P, Liu Z-M. Statin Intolerance-An Asian Perspective. *J.*  
18  
19 *Atheroscler. Thromb.* 2020;27:485–488.  
20  
21  
22  
23 24. Sanz-Cuesta BE, Saver JL. Lipid-Lowering Therapy and Hemorrhagic Stroke  
24  
25 Risk: Comparative Meta-Analysis of Statins and PCSK9 Inhibitors. *Stroke.*  
26  
27 2021;52:3142–3150.  
28  
29  
30  
31 25. Coull AJ, Lovett JK, Rothwell PM. Population Based Study of Early Risk of  
32  
33 Stroke after Transient Ischaemic Attack or Minor Stroke: Implications for  
34  
35 Public Education and Organisation of Services. *BMJ.* 2004;328:326.  
36  
37  
38  
39 26. Pan Y, Li Z, Li J, Jin A, Lin J, Jing J, Li H, Meng X, Wang Y, Wang Y.  
40  
41 Residual Risk and Its Risk Factors for Ischemic Stroke with Adherence to  
42  
43 Guideline-Based Secondary Stroke Prevention. *J. stroke.* 2021;23:51–60.  
44  
45  
46  
47  
48  
49  
50  
51  
52  
53  
54  
55  
56  
57  
58  
59  
60



**Figure 1. Dose-response-relationship curves**

Adjusted odds ratio of events and MACE at 3 months and 12 months according to LDL-C at baseline in patients. (a) stroke at 3 months; (b) ischemic stroke at 3 months; (c) hemorrhagic stroke at 3 months; (d) MACE at 3 months; (e) stroke at 12 months; (f) ischemic stroke at 12 months; (g) hemorrhagic stroke at 12 months; (h) MACE at 12 months. The full line indicates the adjusted hazard ratio and the dashed lines the 95% confidence interval bands. Reference is LDL-C >2.6mmol/L. Data were fitted using a logistic regression model of restricted cubic spline with three knots (the 5th, 50th, 90th percentiles) for LDL-C level, adjusting for potential covariates.



Dose-response-relationship curves

STROBE Statement—Checklist of items that should be included in reports of *cohort studies*

|                           | Item No | Recommendation                                                                                                                                                                                                                                                                                                         | Page No                     |
|---------------------------|---------|------------------------------------------------------------------------------------------------------------------------------------------------------------------------------------------------------------------------------------------------------------------------------------------------------------------------|-----------------------------|
| <b>Title and abstract</b> | 1       | (a) Indicate the study's design with a commonly used term in the title or the abstract<br>(b) Provide in the abstract an informative and balanced summary of what was done and what was found                                                                                                                          | 1<br>3                      |
| <b>Introduction</b>       |         |                                                                                                                                                                                                                                                                                                                        |                             |
| Background/rationale      | 2       | Explain the scientific background and rationale for the investigation being reported                                                                                                                                                                                                                                   | 5                           |
| Objectives                | 3       | State specific objectives, including any prespecified hypotheses                                                                                                                                                                                                                                                       | 6                           |
| <b>Methods</b>            |         |                                                                                                                                                                                                                                                                                                                        |                             |
| Study design              | 4       | Present key elements of study design early in the paper                                                                                                                                                                                                                                                                | 7                           |
| Setting                   | 5       | Describe the setting, locations, and relevant dates, including periods of recruitment, exposure, follow-up, and data collection                                                                                                                                                                                        | 8                           |
| Participants              | 6       | (a) Give the eligibility criteria, and the sources and methods of selection of participants. Describe methods of follow-up<br>(b) For matched studies, give matching criteria and number of exposed and unexposed                                                                                                      | 7<br>N/A                    |
| Variables                 | 7       | Clearly define all outcomes, exposures, predictors, potential confounders, and effect modifiers. Give diagnostic criteria, if applicable                                                                                                                                                                               | 8                           |
| Data sources/measurement  | 8*      | For each variable of interest, give sources of data and details of methods of assessment (measurement). Describe comparability of assessment methods if there is more than one group                                                                                                                                   | 8                           |
| Bias                      | 9       | Describe any efforts to address potential sources of bias                                                                                                                                                                                                                                                              | 9                           |
| Study size                | 10      | Explain how the study size was arrived at                                                                                                                                                                                                                                                                              | 8                           |
| Quantitative variables    | 11      | Explain how quantitative variables were handled in the analyses. If applicable, describe which groupings were chosen and why                                                                                                                                                                                           | 10                          |
| Statistical methods       | 12      | (a) Describe all statistical methods, including those used to control for confounding<br>(b) Describe any methods used to examine subgroups and interactions<br>(c) Explain how missing data were addressed<br>(d) If applicable, explain how loss to follow-up was addressed<br>(e) Describe any sensitivity analyses | 10<br>10<br>10<br>11<br>N/A |
| <b>Results</b>            |         |                                                                                                                                                                                                                                                                                                                        |                             |
| Participants              | 13*     | (a) Report numbers of individuals at each stage of study—eg numbers potentially eligible, examined for eligibility, confirmed eligible, included in the study, completing follow-up, and analysed<br>(b) Give reasons for non-participation at each stage<br>(c) Consider use of a flow diagram                        | 11<br>N/A<br>N/A            |
| Descriptive data          | 14*     | (a) Give characteristics of study participants (eg demographic, clinical, social) and information on exposures and potential confounders<br>(b) Indicate number of participants with missing data for each variable of interest<br>(c) Summarise follow-up time (eg, average and total amount)                         | 11<br>N/A<br>12             |
| Outcome data              | 15*     | Report numbers of outcome events or summary measures over time                                                                                                                                                                                                                                                         | 13                          |

|    |                          |    |                                                                                                                                                                                                              |    |
|----|--------------------------|----|--------------------------------------------------------------------------------------------------------------------------------------------------------------------------------------------------------------|----|
| 1  | Main results             | 16 | (a) Give unadjusted estimates and, if applicable, confounder-adjusted estimates and their precision (eg, 95% confidence interval). Make clear which confounders were adjusted for and why they were included | 13 |
| 2  |                          |    | (b) Report category boundaries when continuous variables were categorized                                                                                                                                    | 13 |
| 3  |                          |    | (c) If relevant, consider translating estimates of relative risk into absolute risk for a meaningful time period                                                                                             | 14 |
| 4  |                          |    |                                                                                                                                                                                                              |    |
| 5  | Other analyses           | 17 | Report other analyses done—eg analyses of subgroups and interactions, and sensitivity analyses                                                                                                               | 14 |
| 6  |                          |    |                                                                                                                                                                                                              |    |
| 7  |                          |    |                                                                                                                                                                                                              |    |
| 8  |                          |    |                                                                                                                                                                                                              |    |
| 9  |                          |    |                                                                                                                                                                                                              |    |
| 10 |                          |    |                                                                                                                                                                                                              |    |
| 11 | <b>Discussion</b>        |    |                                                                                                                                                                                                              |    |
| 12 | Key results              | 18 | Summarise key results with reference to study objectives                                                                                                                                                     | 17 |
| 13 | Limitations              | 19 | Discuss limitations of the study, taking into account sources of potential bias or imprecision. Discuss both direction and magnitude of any potential bias                                                   | 20 |
| 14 |                          |    |                                                                                                                                                                                                              |    |
| 15 | Interpretation           | 20 | Give a cautious overall interpretation of results considering objectives, limitations, multiplicity of analyses, results from similar studies, and other relevant evidence                                   | 18 |
| 16 |                          |    |                                                                                                                                                                                                              |    |
| 17 | Generalisability         | 21 | Discuss the generalisability (external validity) of the study results                                                                                                                                        | 18 |
| 18 |                          |    |                                                                                                                                                                                                              |    |
| 19 |                          |    |                                                                                                                                                                                                              |    |
| 20 |                          |    |                                                                                                                                                                                                              |    |
| 21 | <b>Other information</b> |    |                                                                                                                                                                                                              |    |
| 22 | Funding                  | 22 | Give the source of funding and the role of the funders for the present study and, if applicable, for the original study on which the present article is based                                                | 21 |
| 23 |                          |    |                                                                                                                                                                                                              |    |
| 24 |                          |    |                                                                                                                                                                                                              |    |

\*Give information separately for exposed and unexposed groups.

**Note:** An Explanation and Elaboration article discusses each checklist item and gives methodological background and published examples of transparent reporting. The STROBE checklist is best used in conjunction with this article (freely available on the Web sites of PLoS Medicine at <http://www.plosmedicine.org/>, Annals of Internal Medicine at <http://www.annals.org/>, and Epidemiology at <http://www.epidem.com/>). Information on the STROBE Initiative is available at <http://www.strobe-statement.org>.
